# Supplementary material for: Identifying Selected Regions from Heterozygosity and Divergence Using a Light-Coverage Genomic Dataset from Two Human Populations
Source: PubMed Central journal article supplement (PMC2248624; doi:10.1371/journal.pone.0001712), 2008-03-05

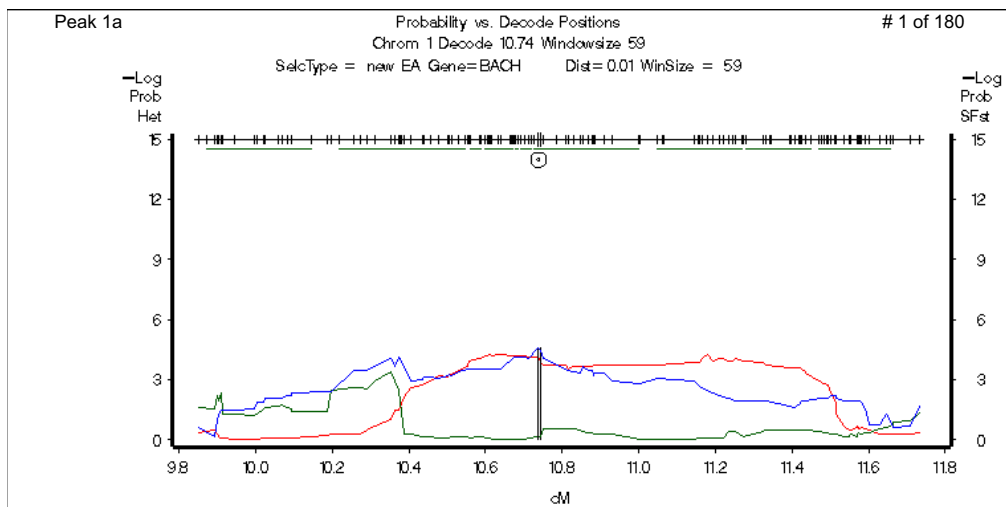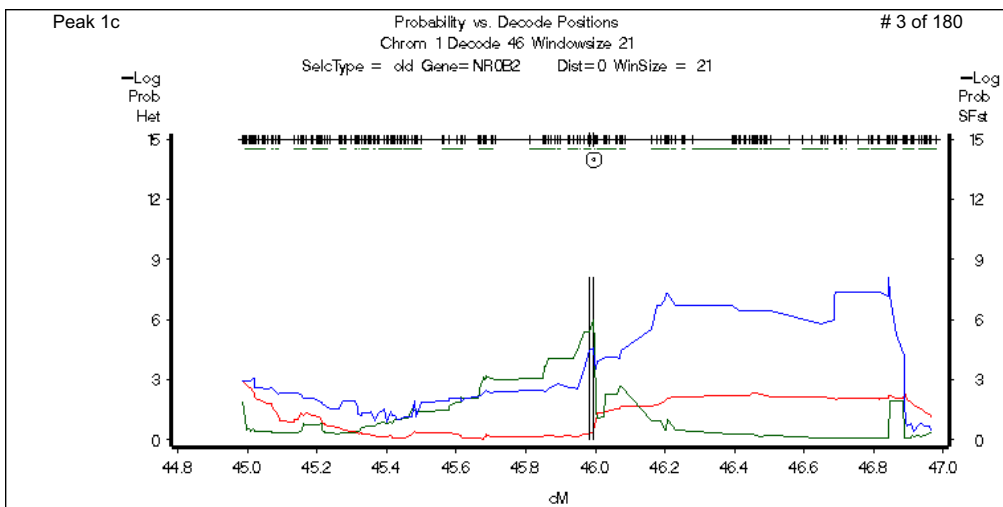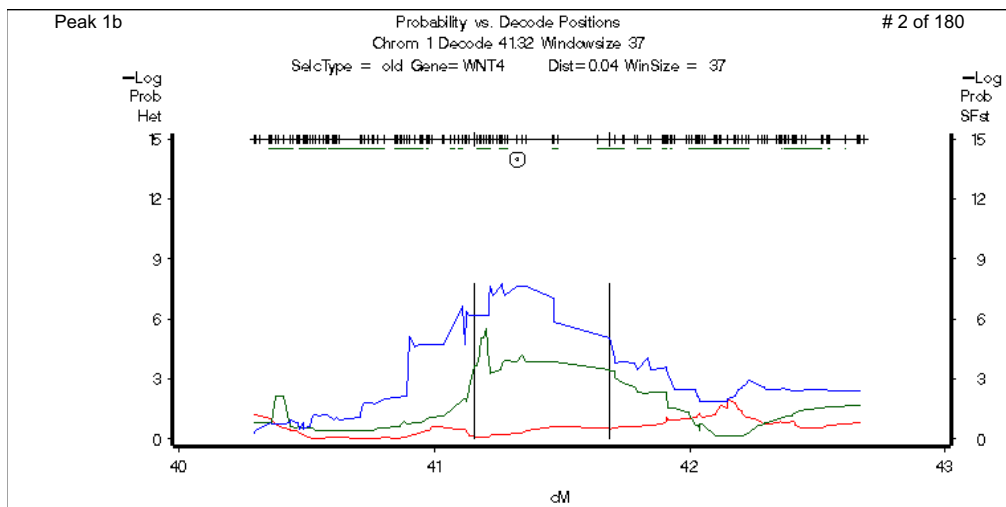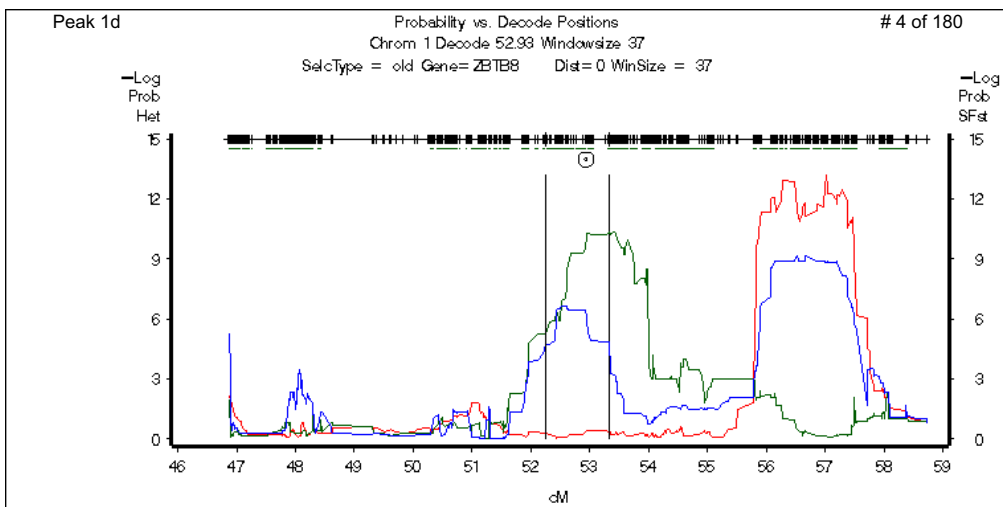

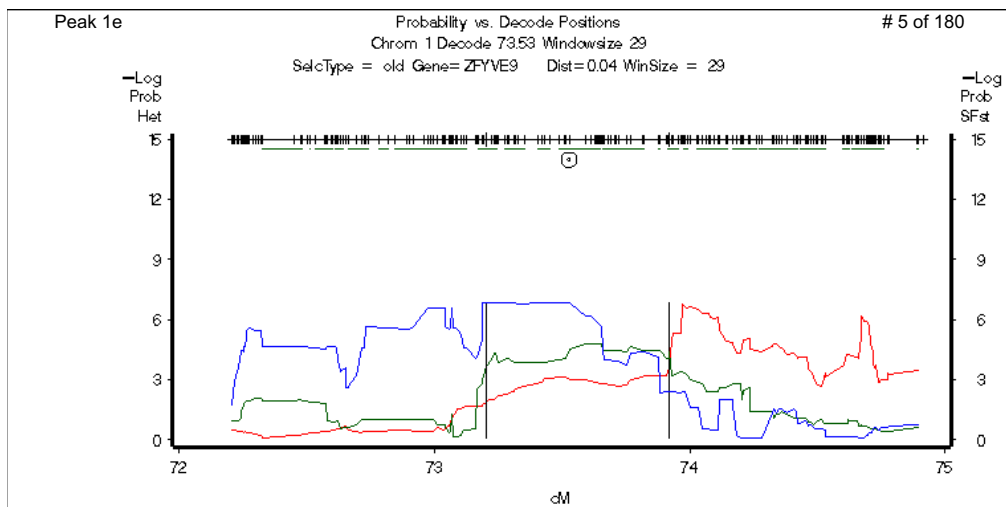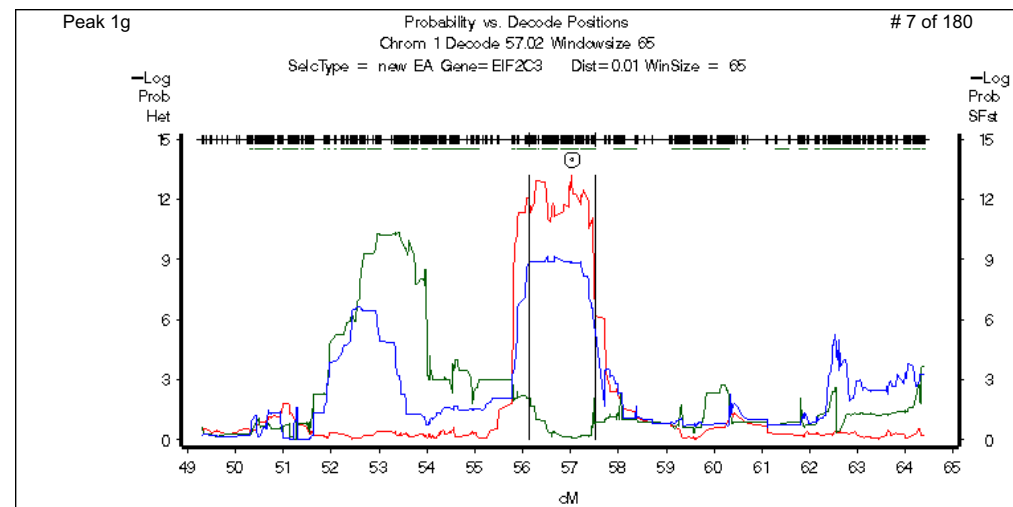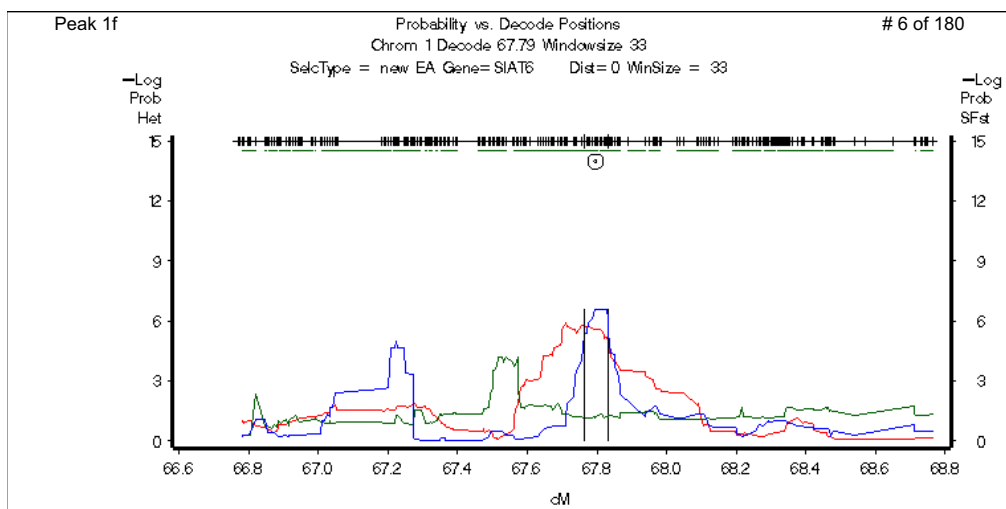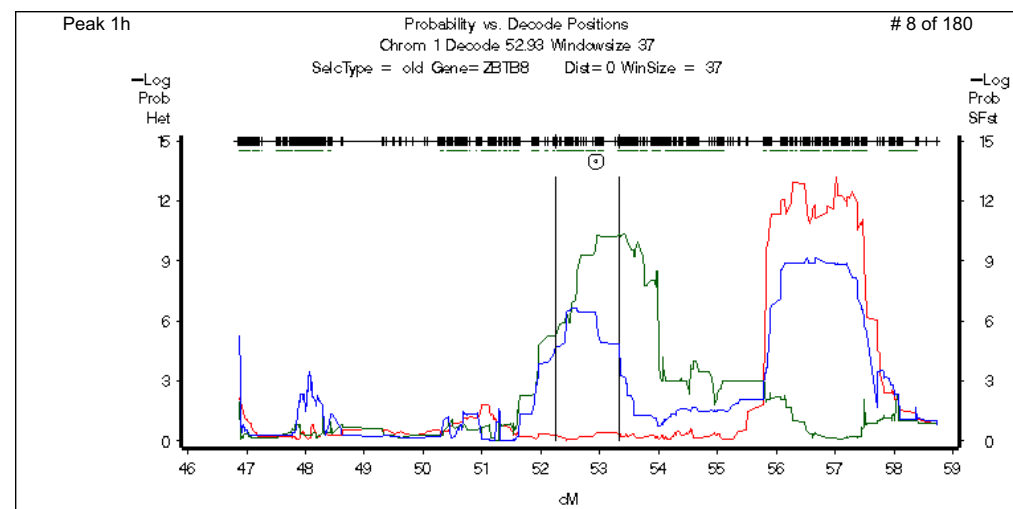

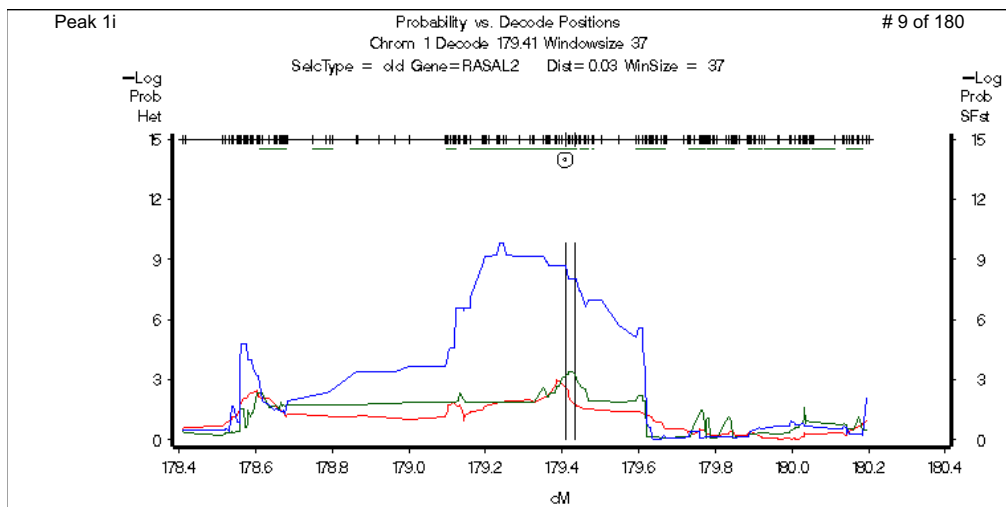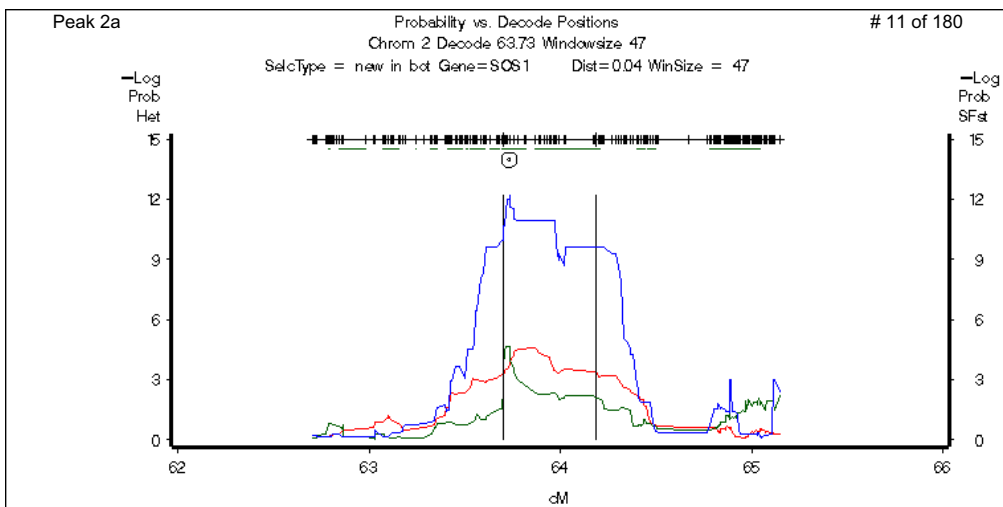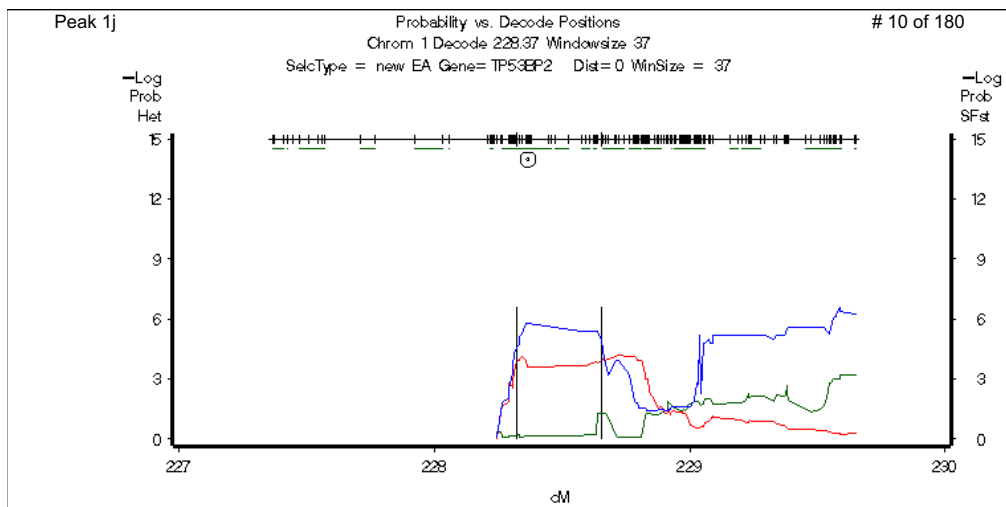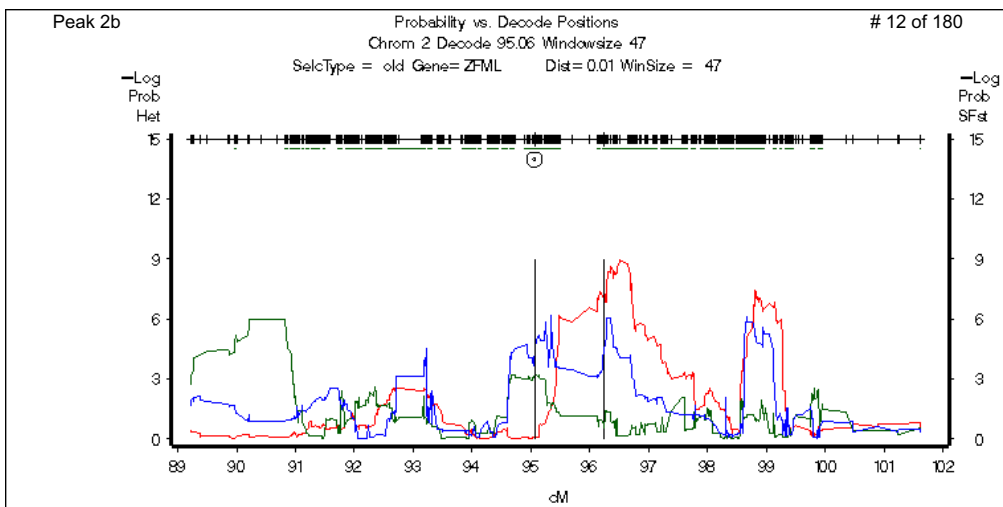

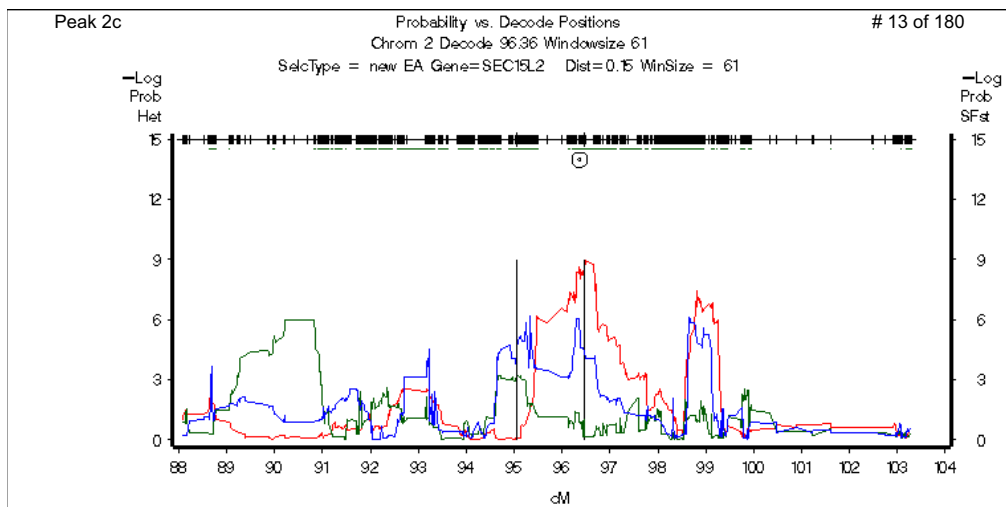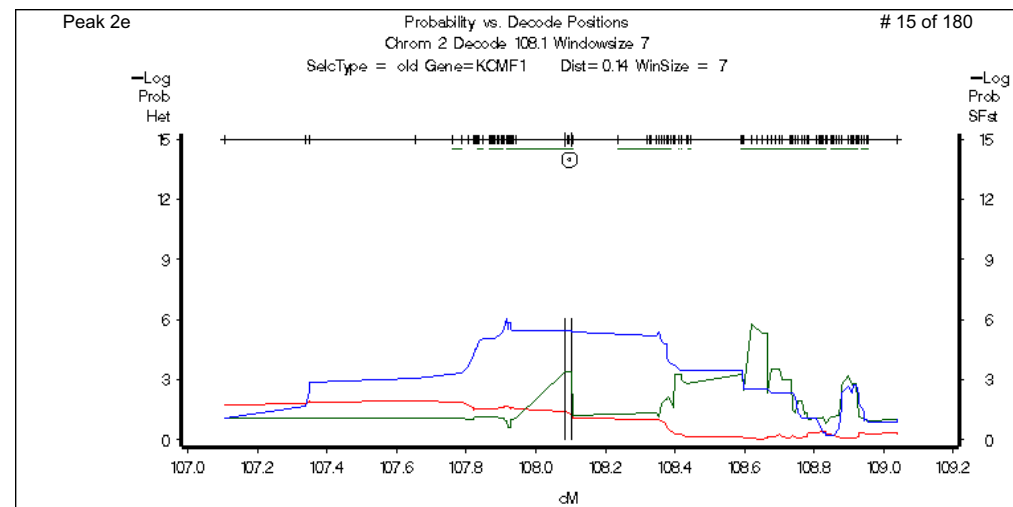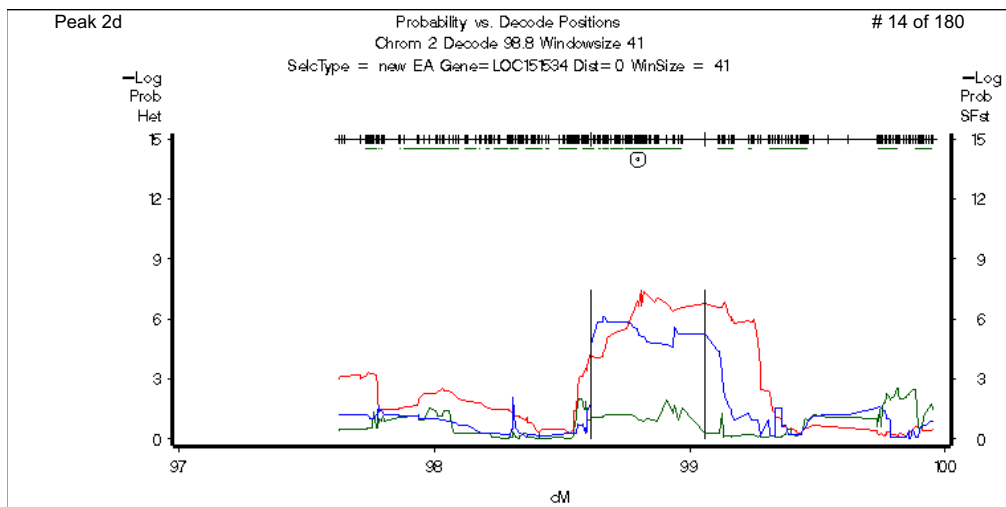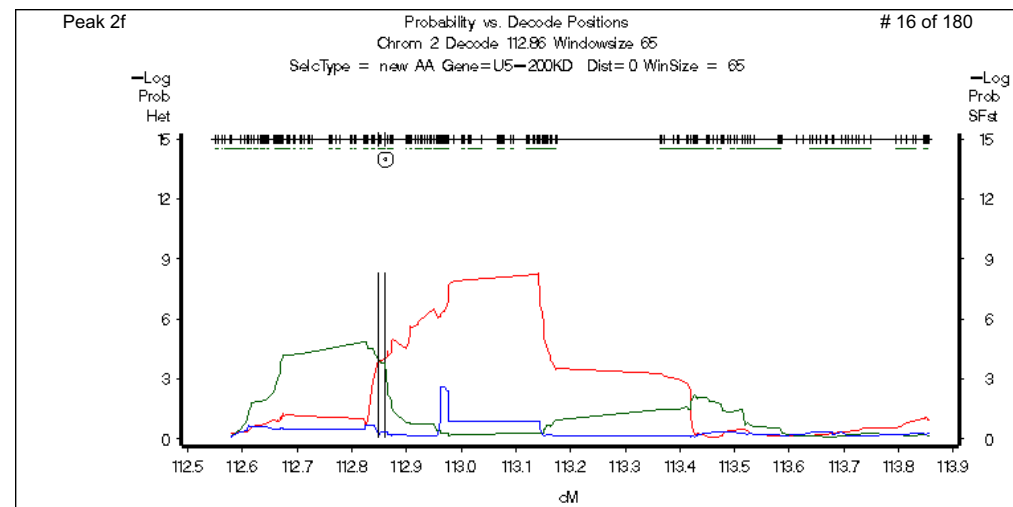

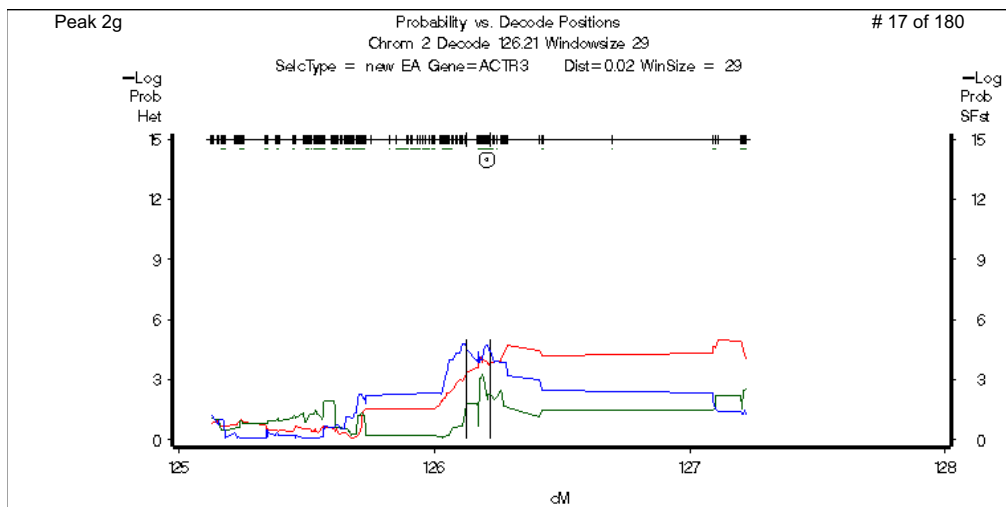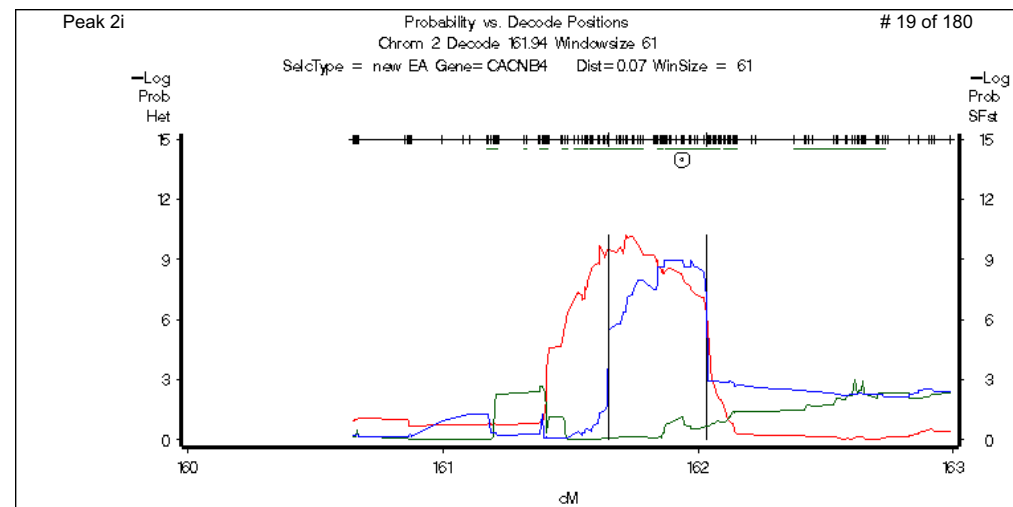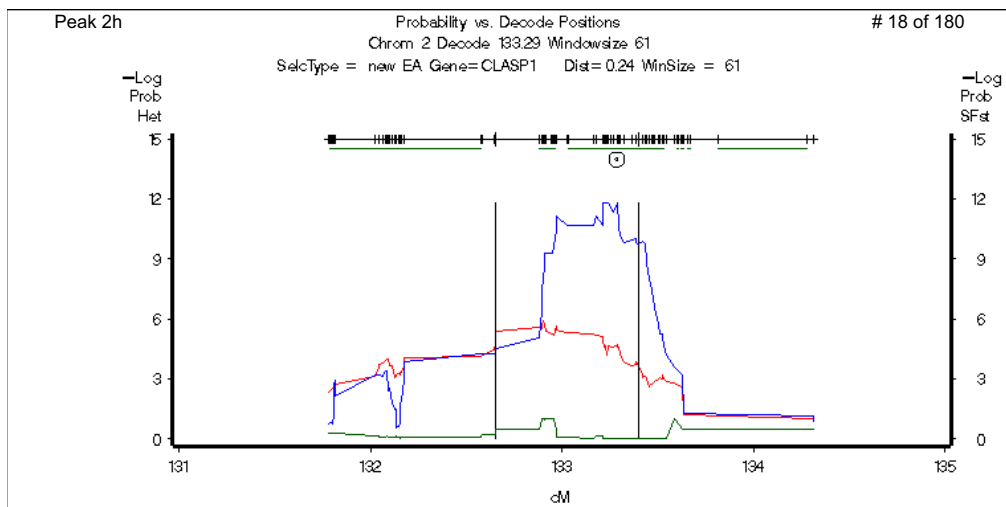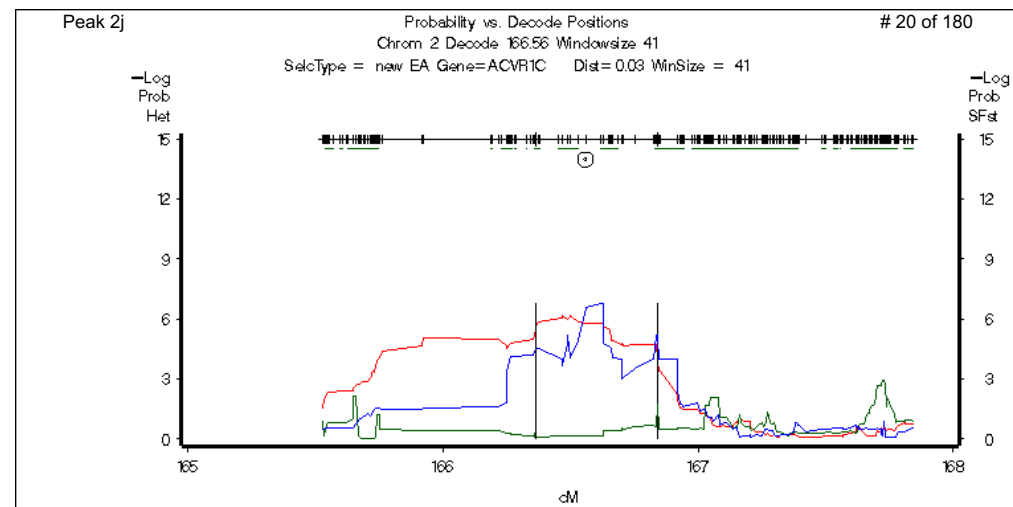

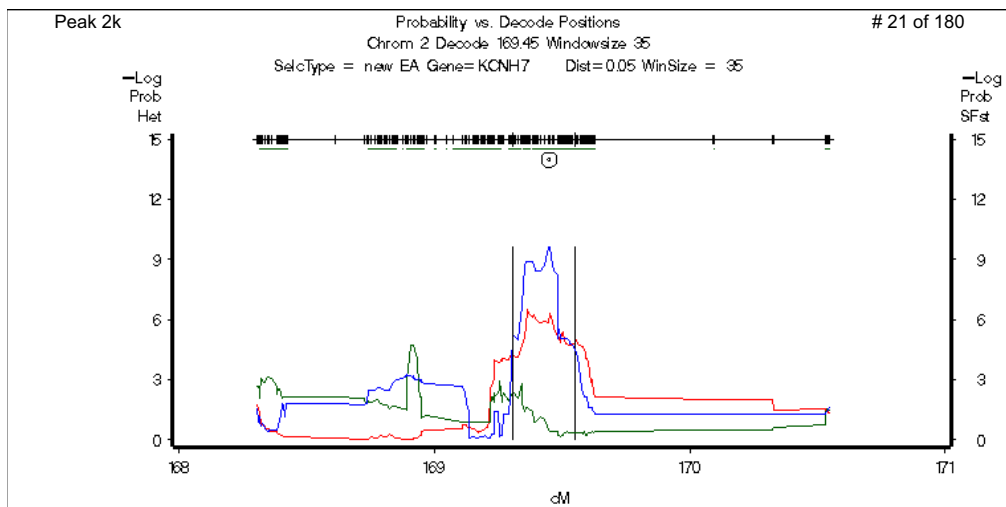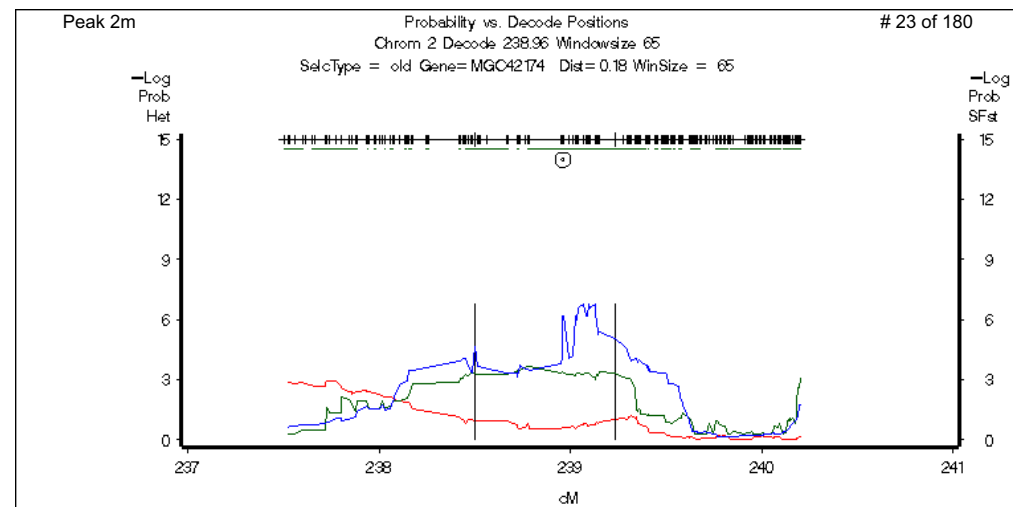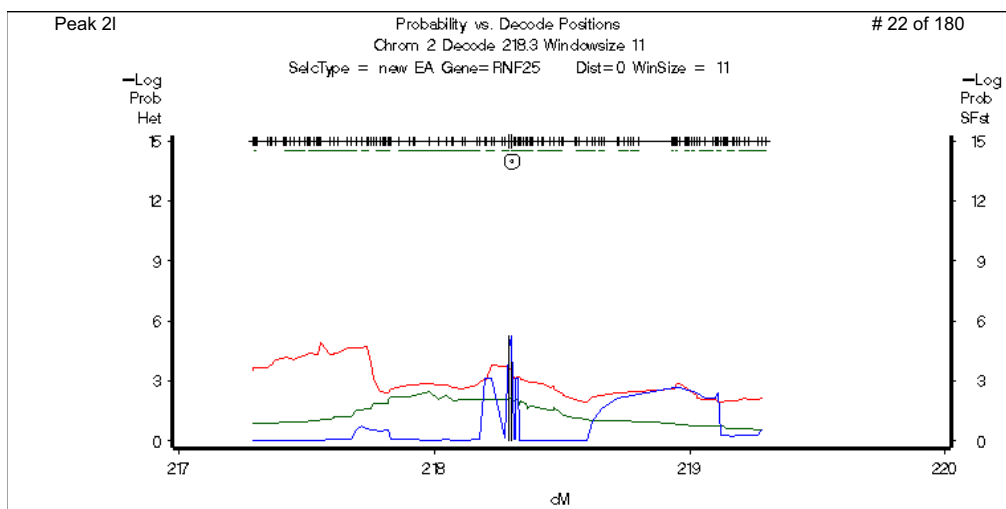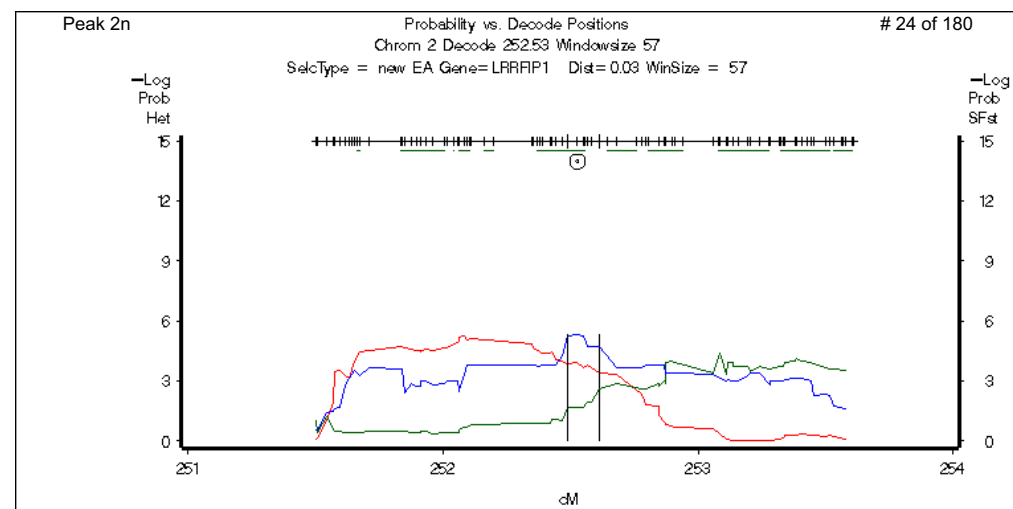

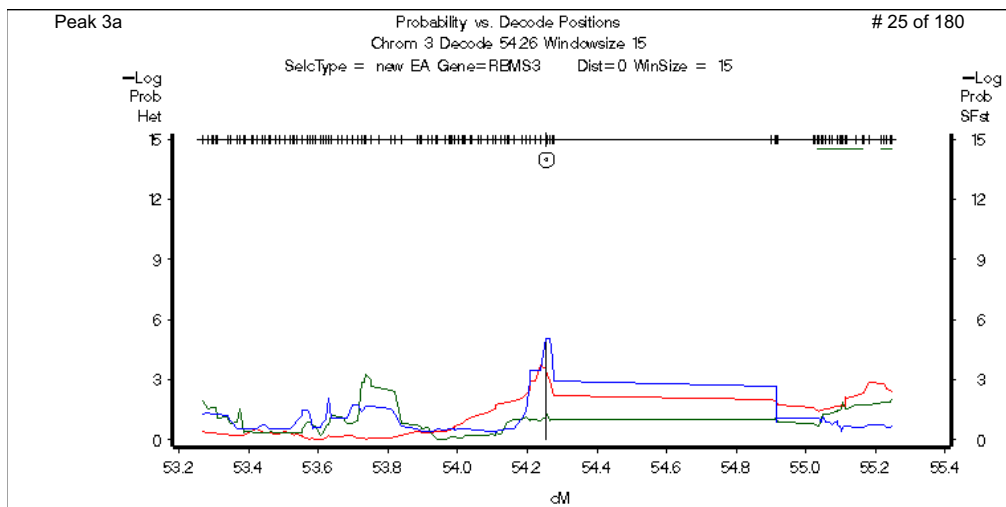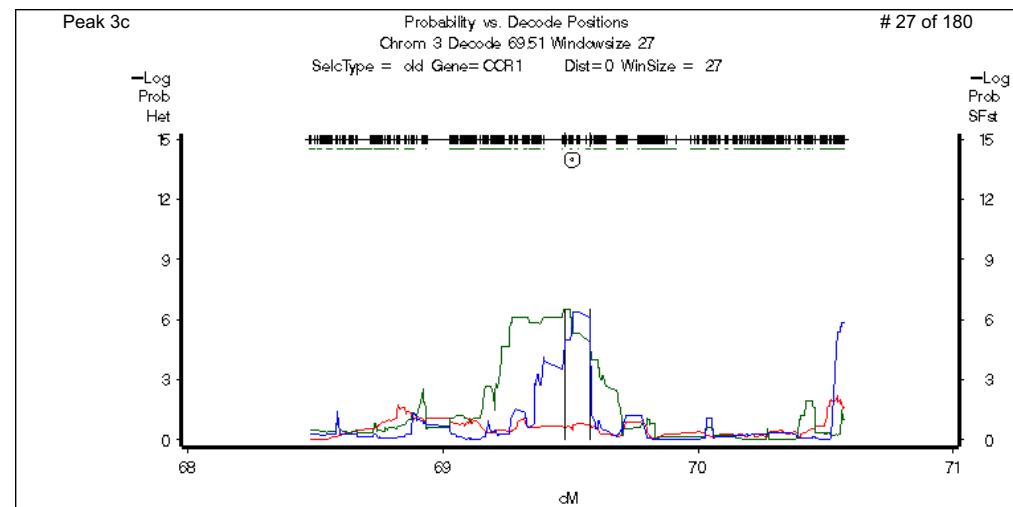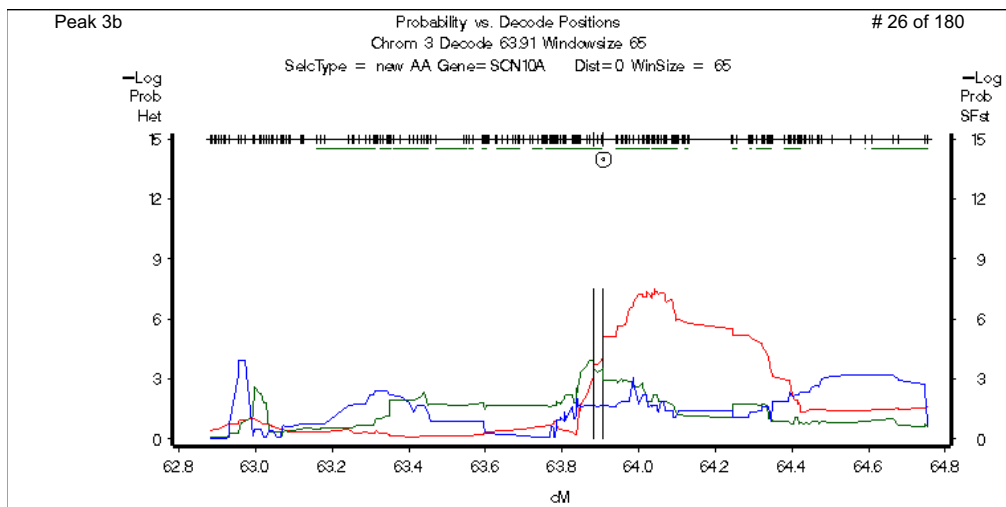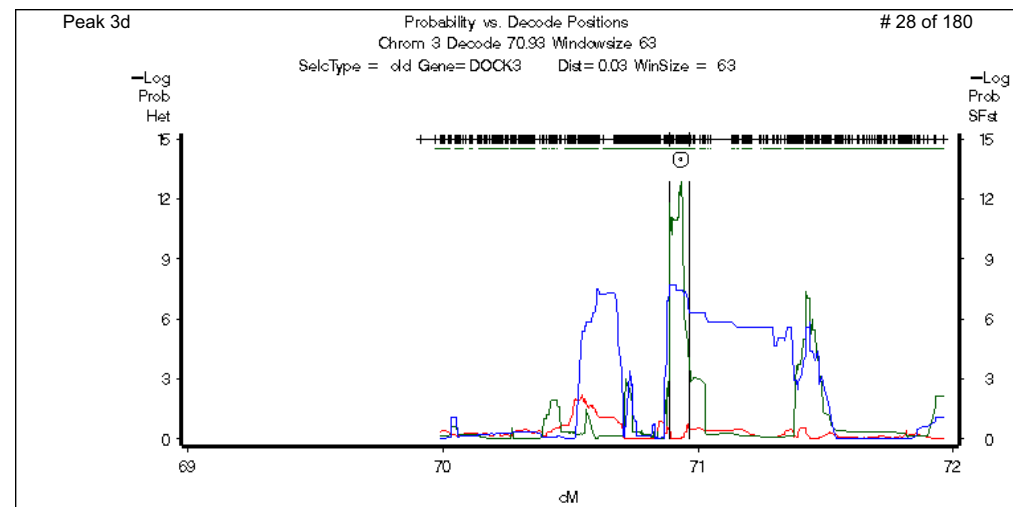

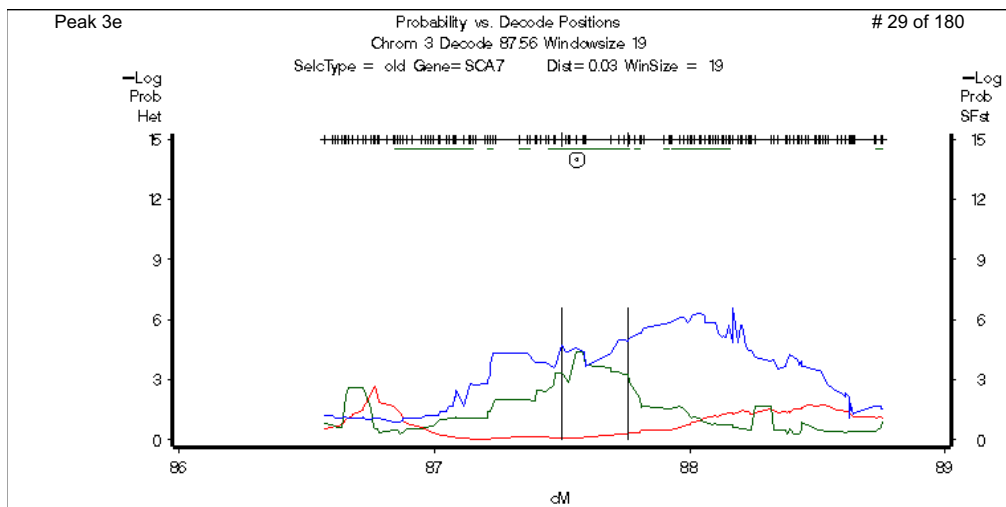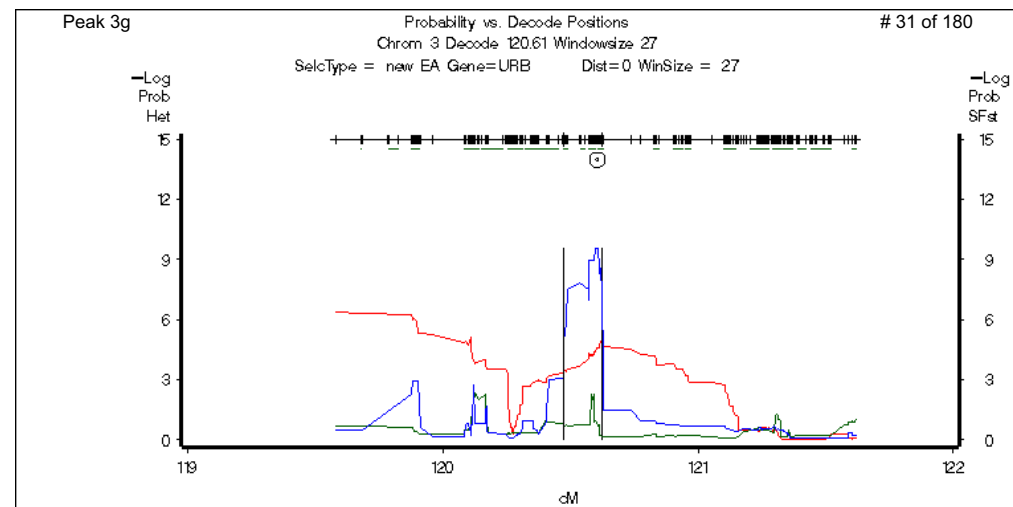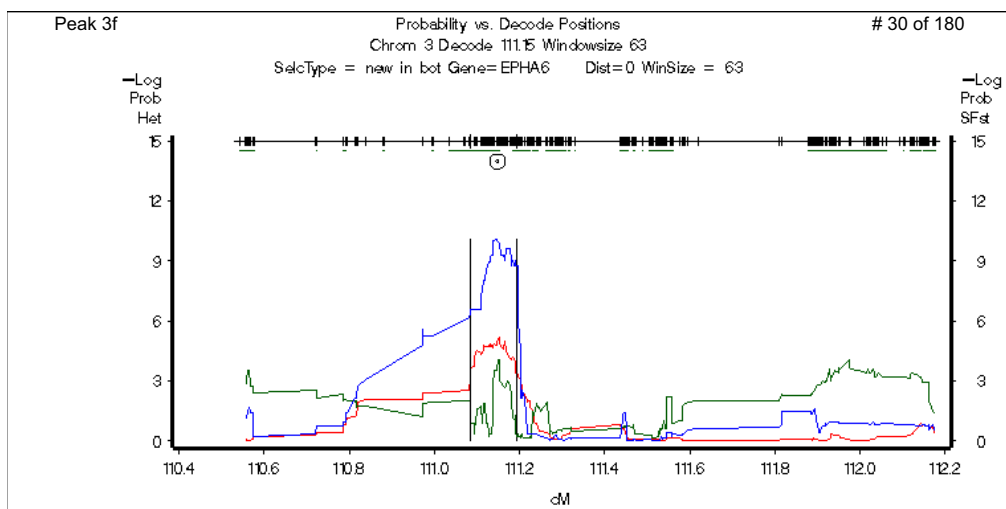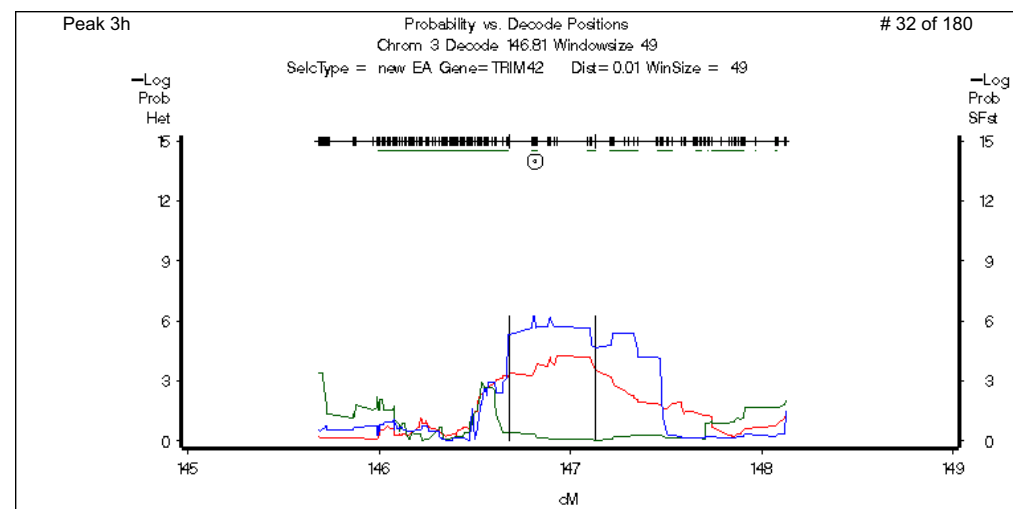



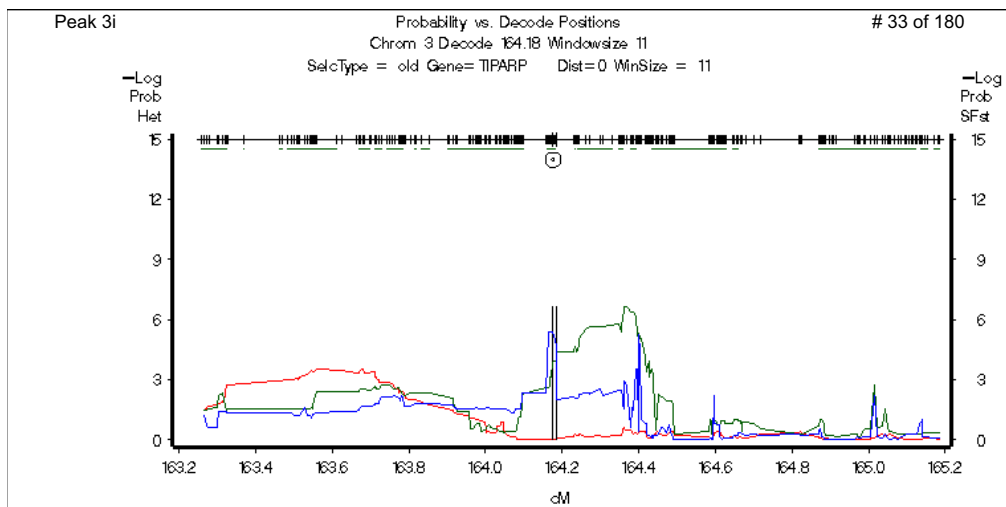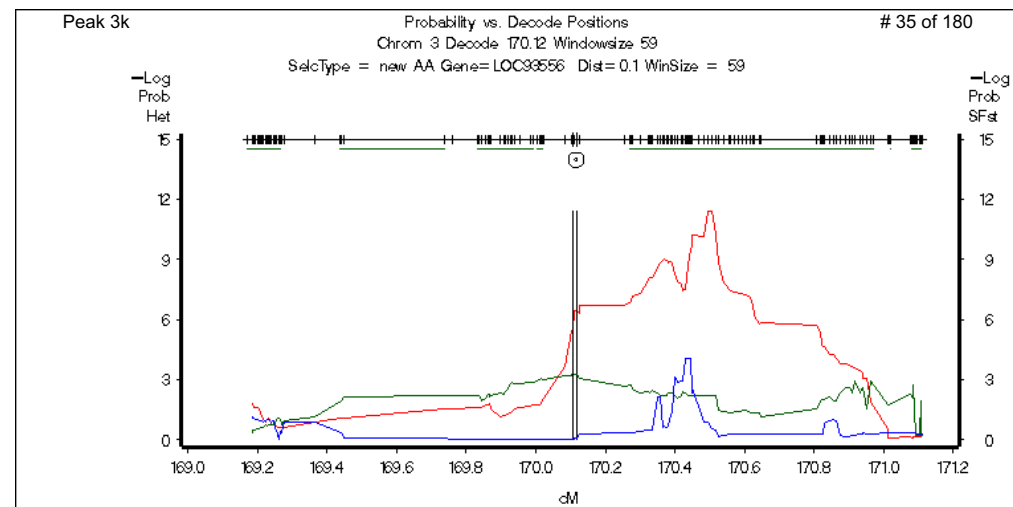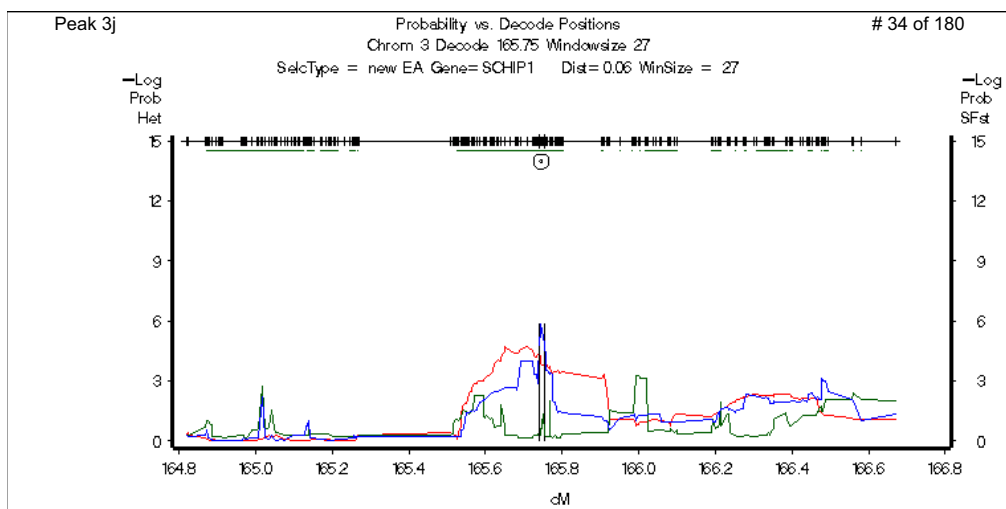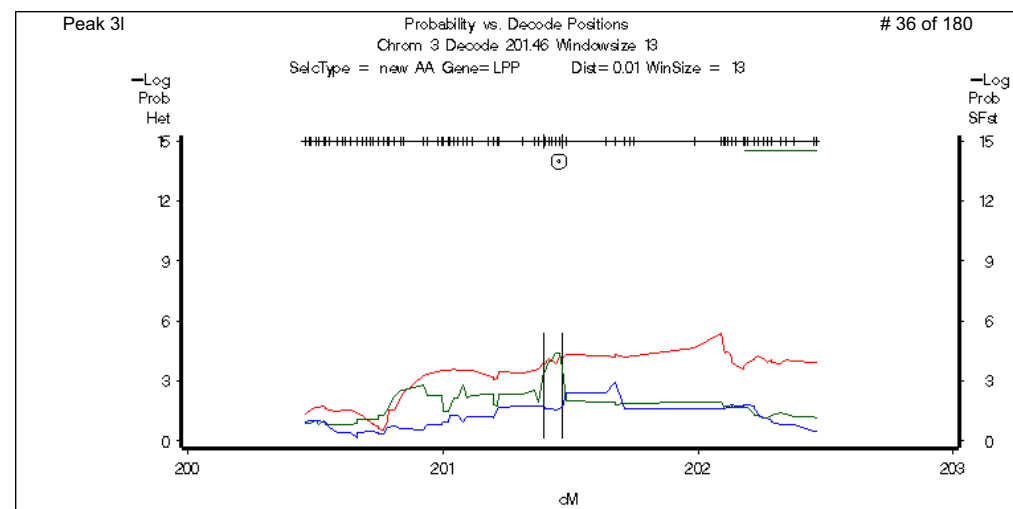

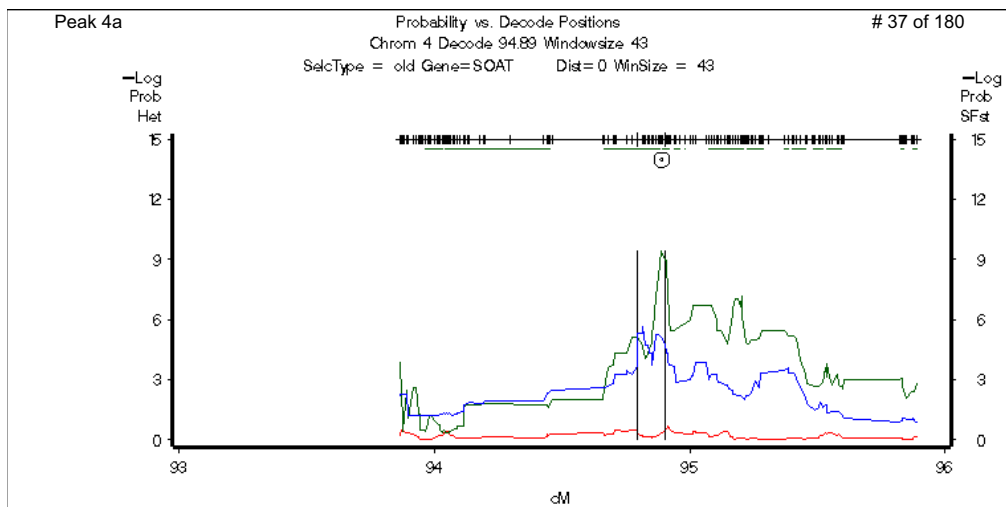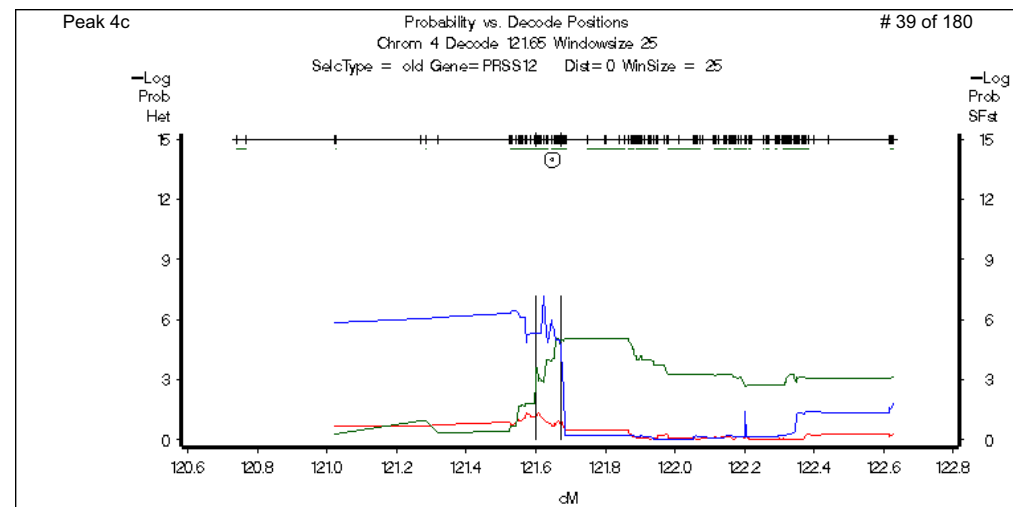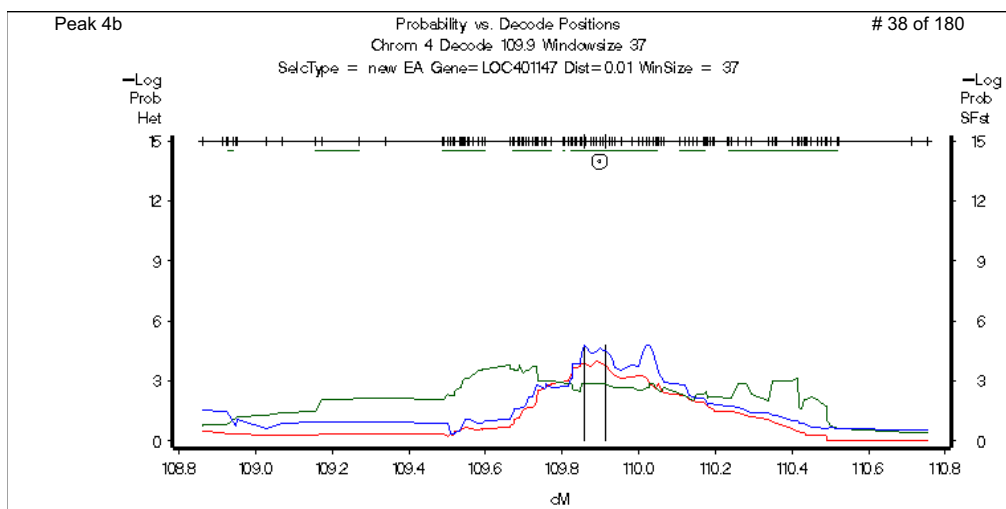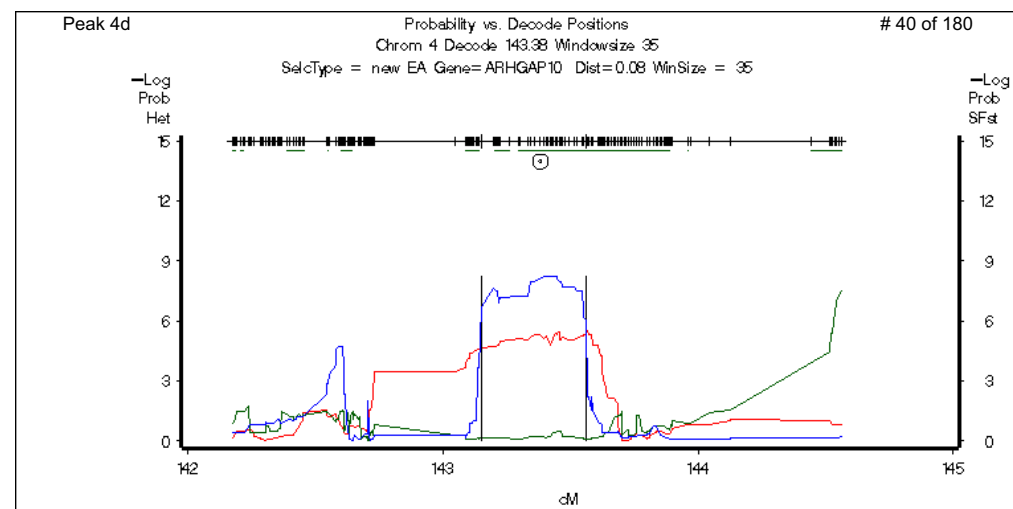

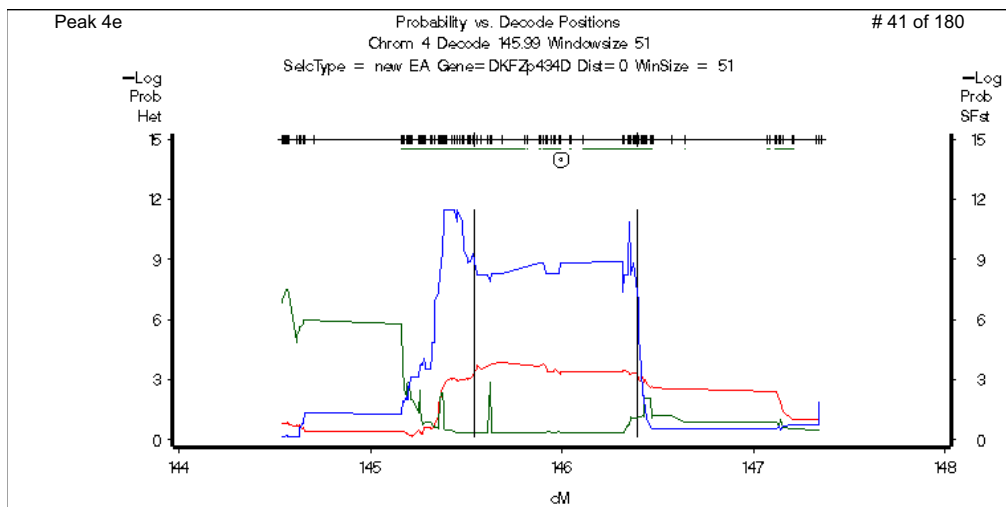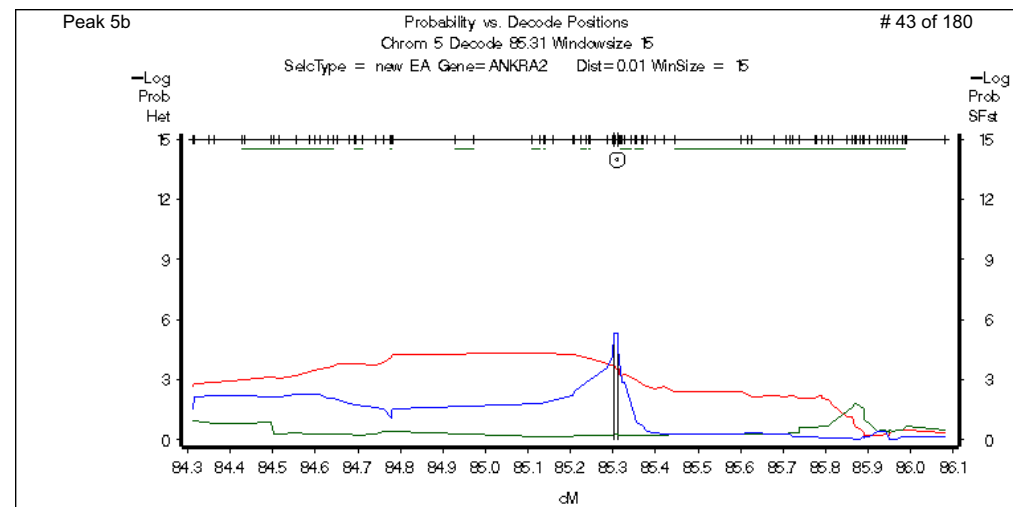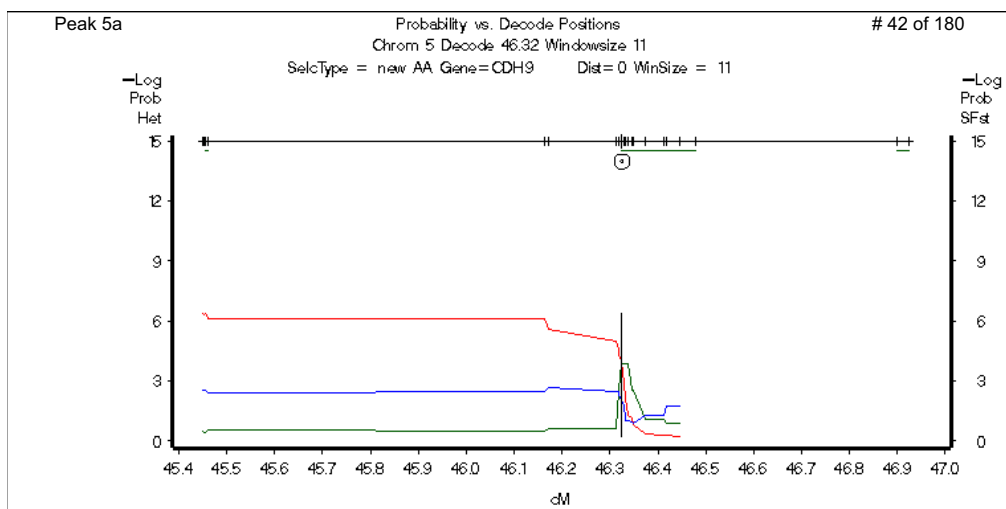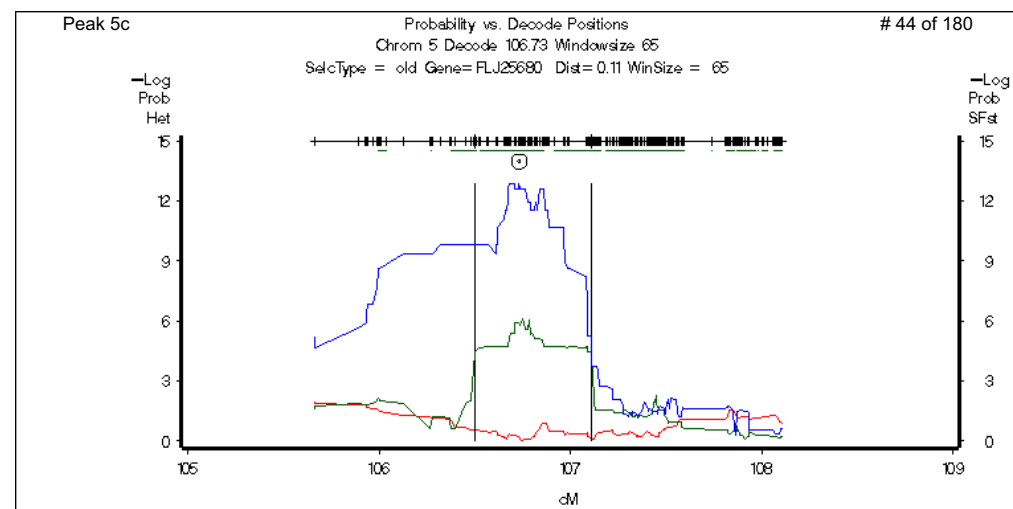

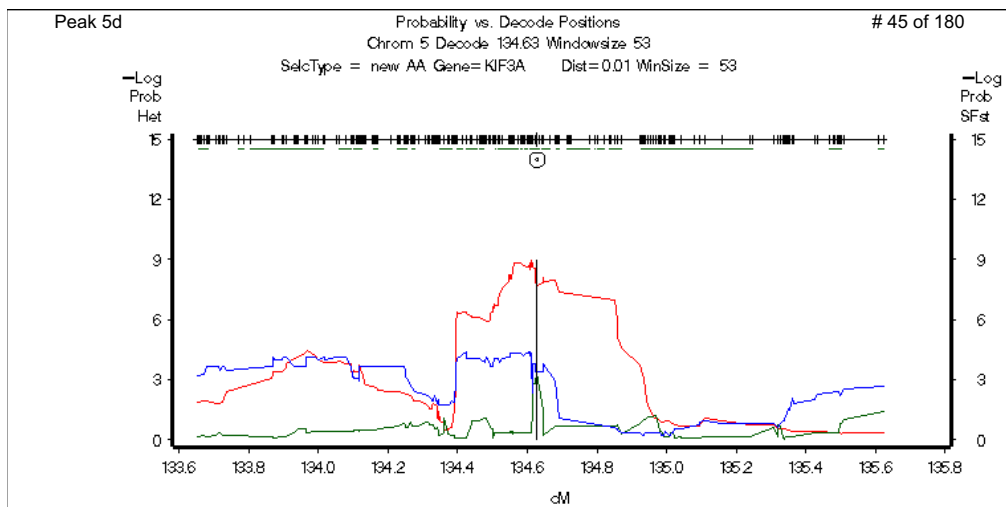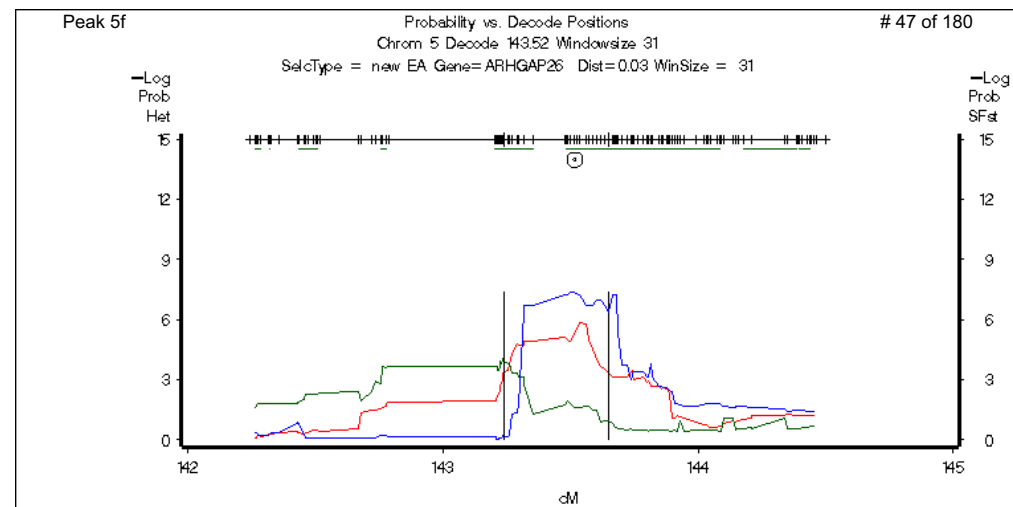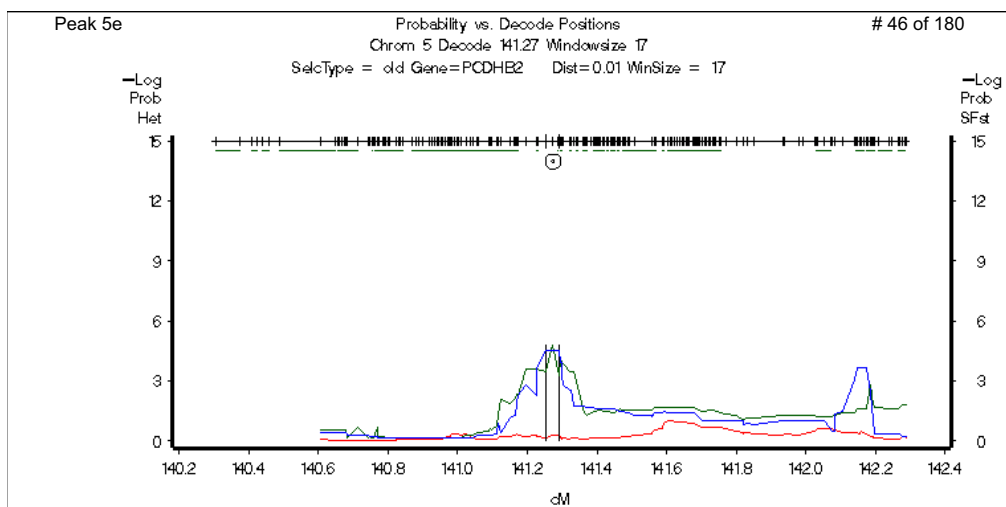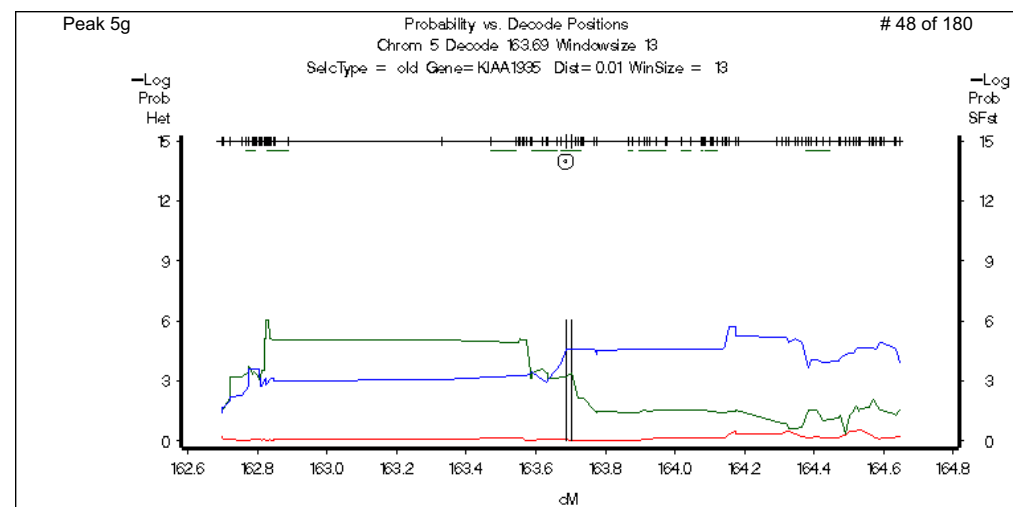

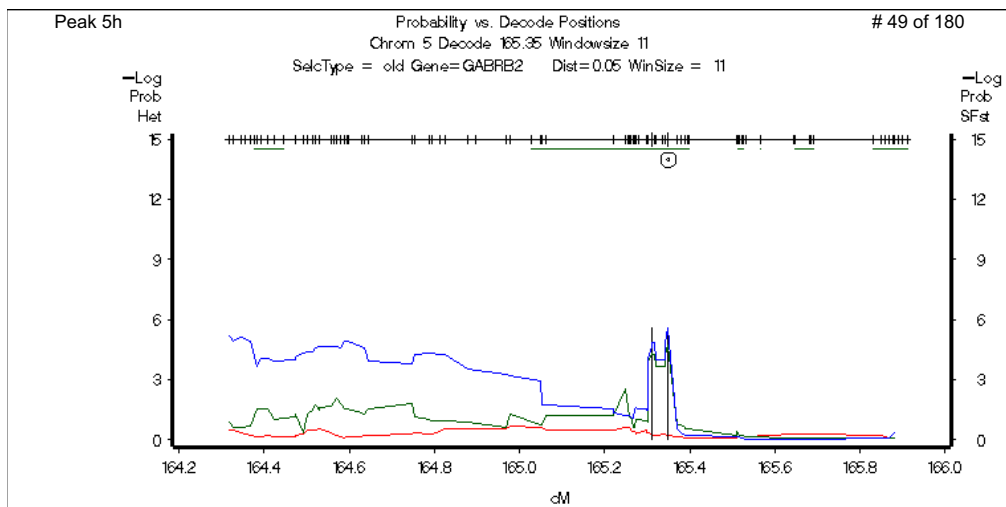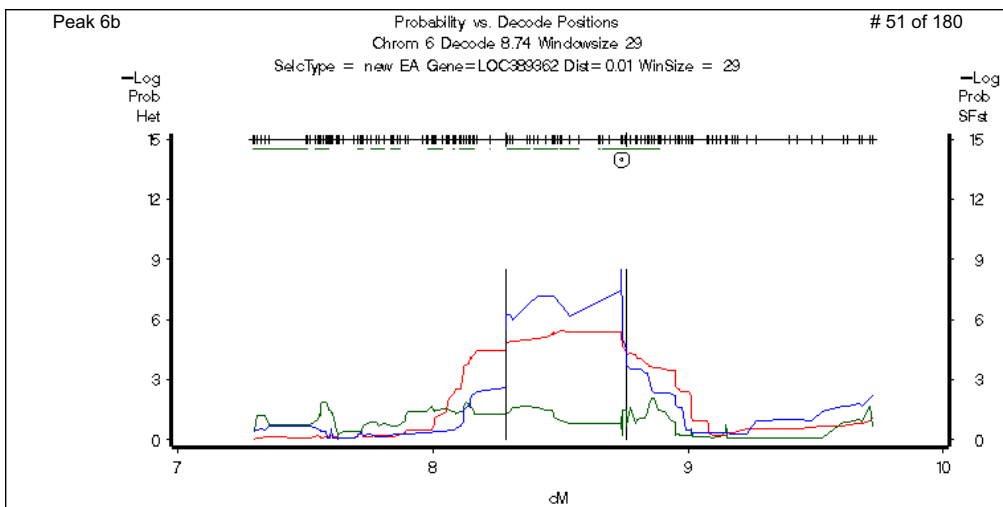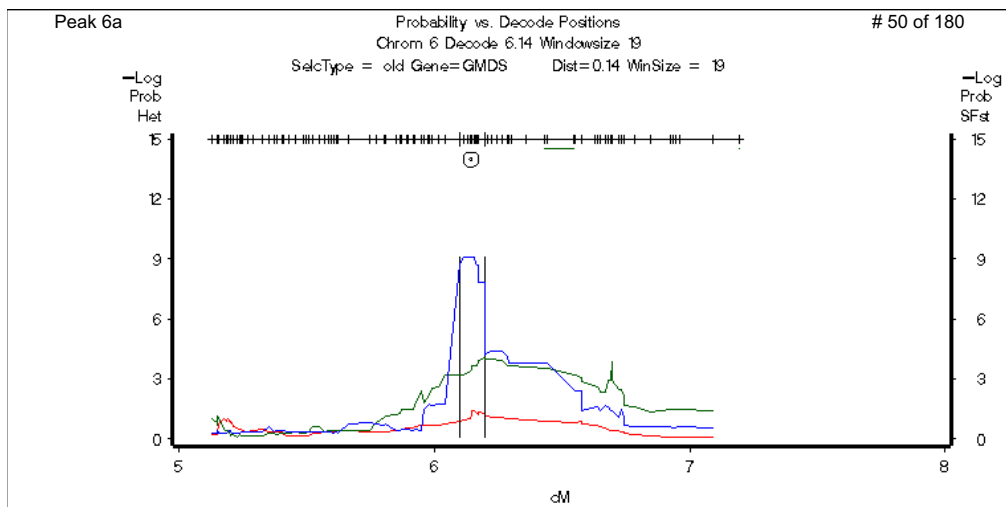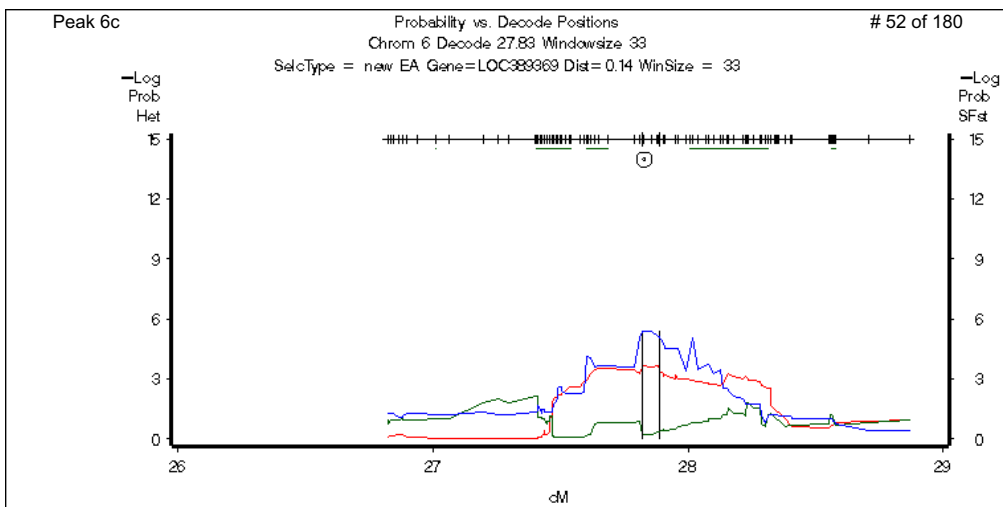

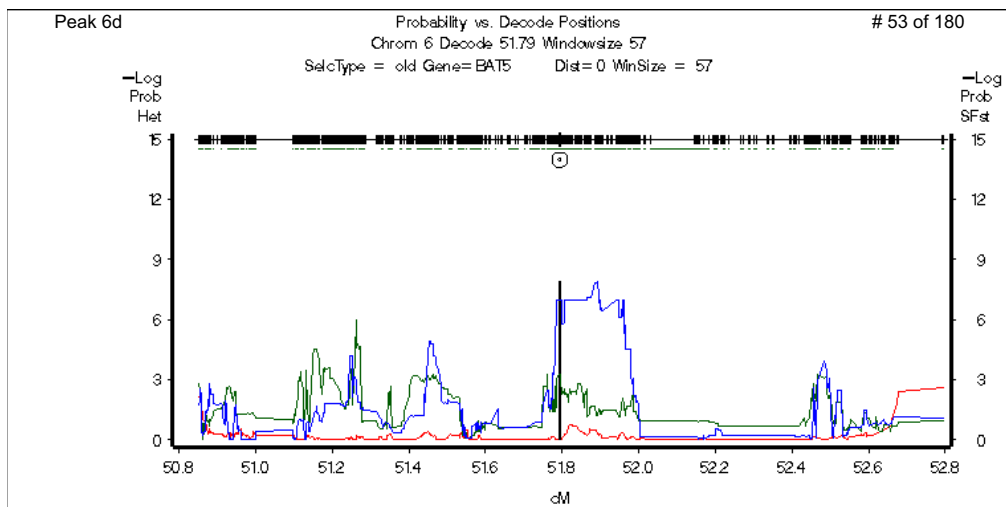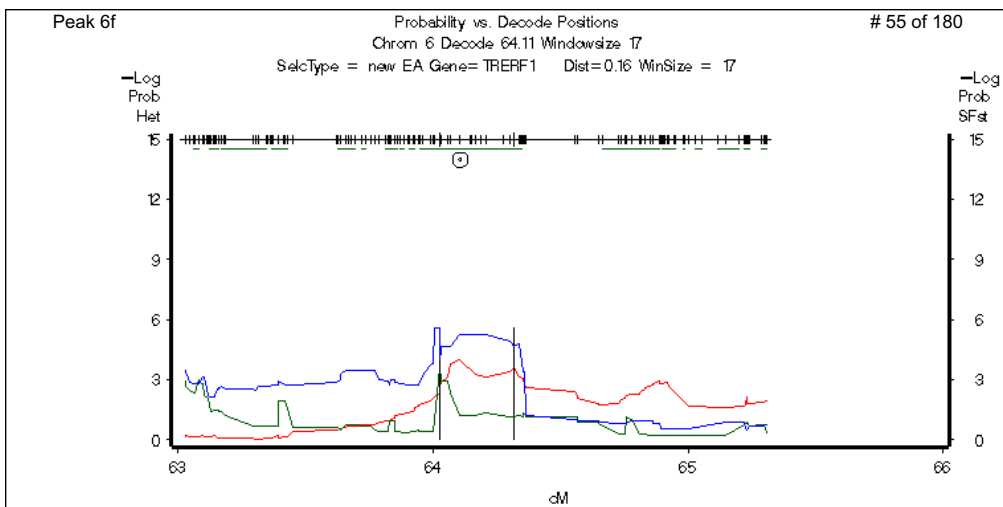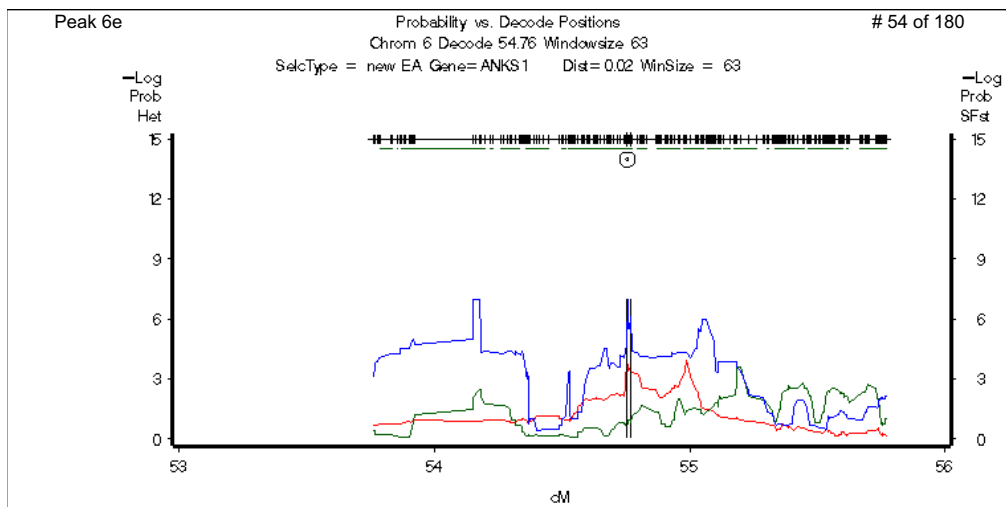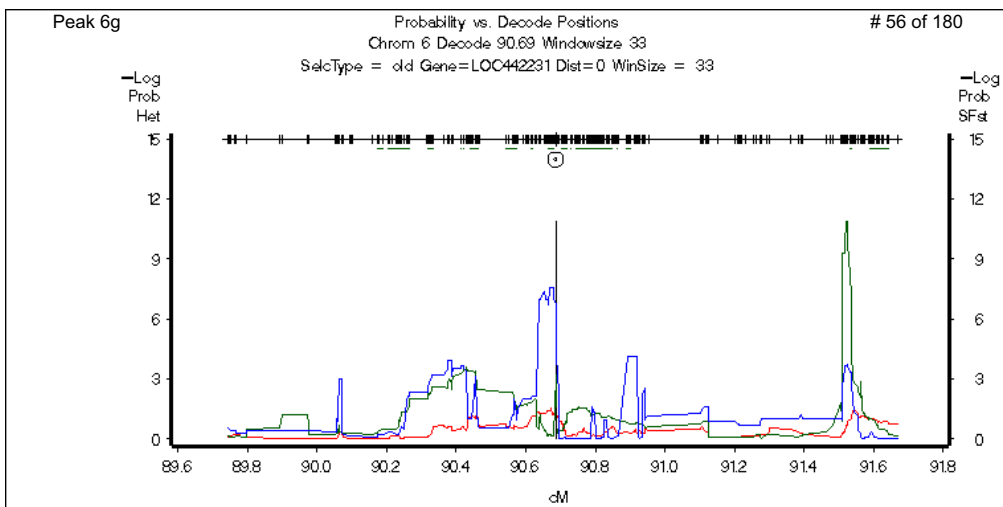

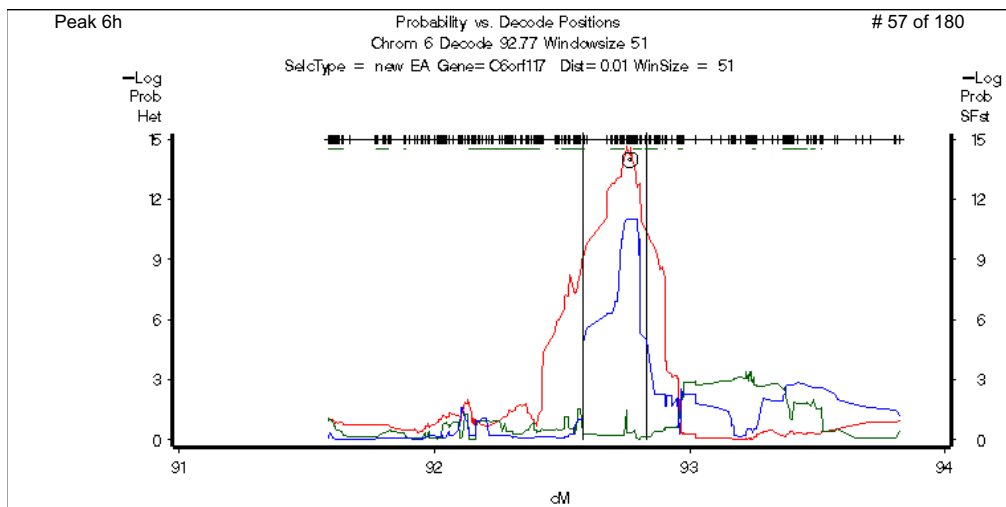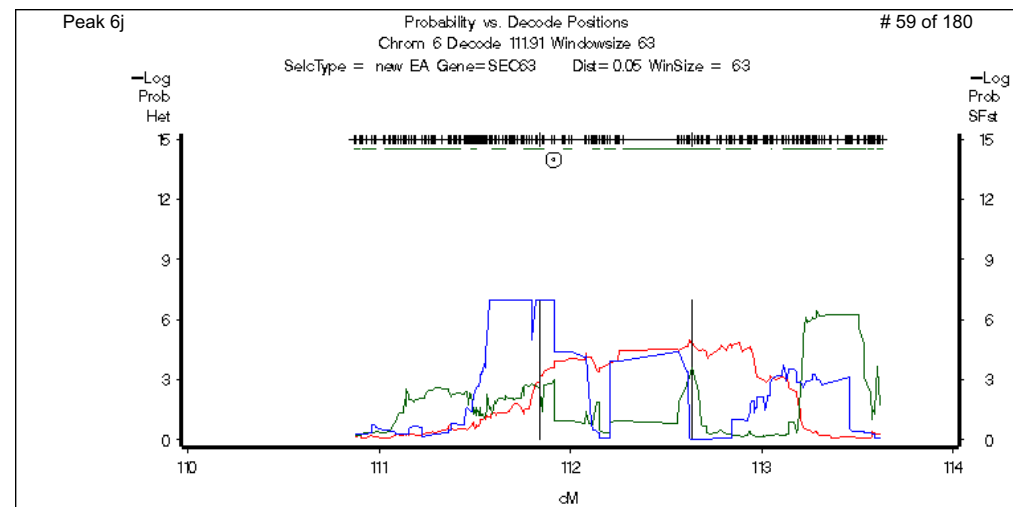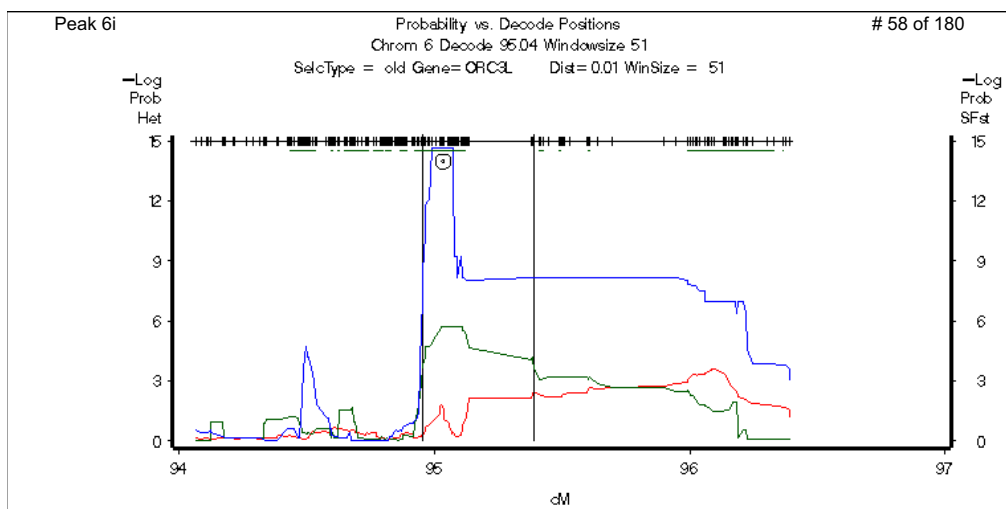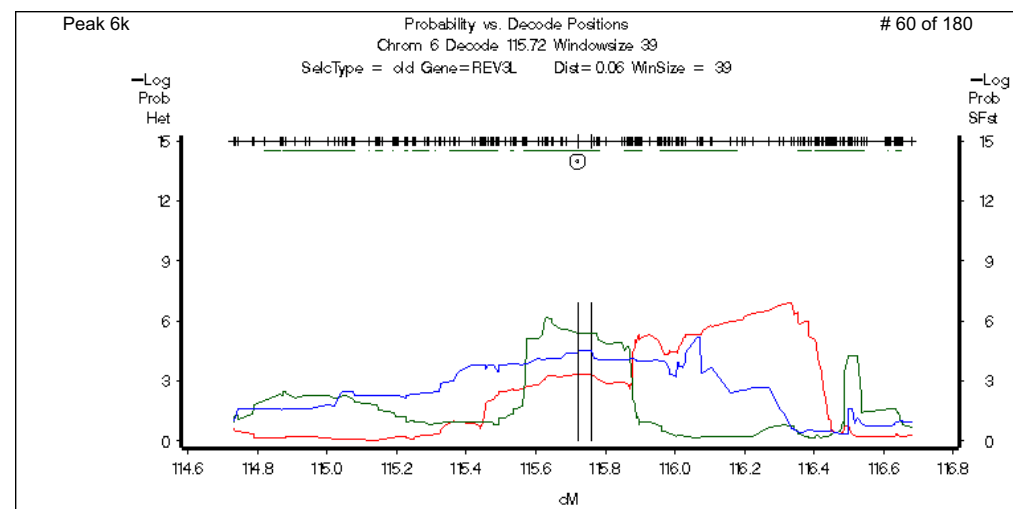

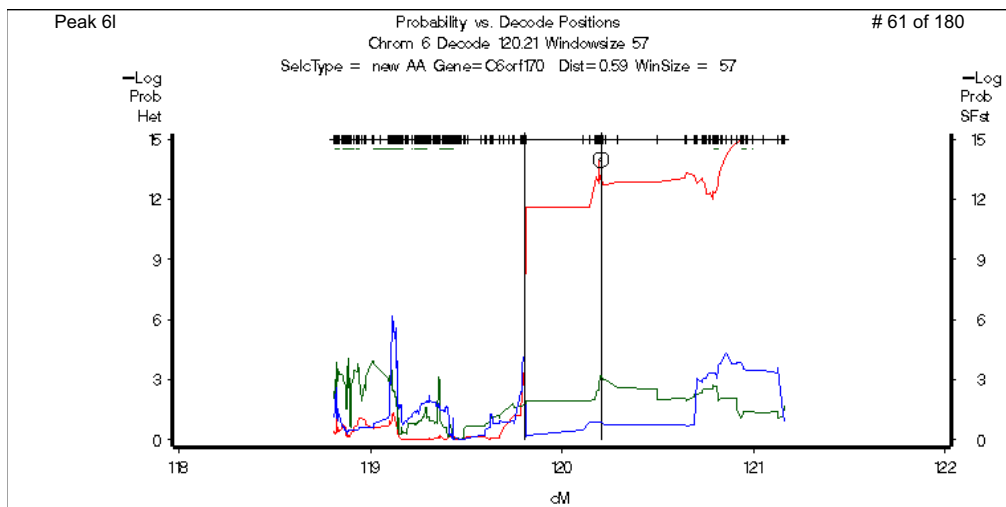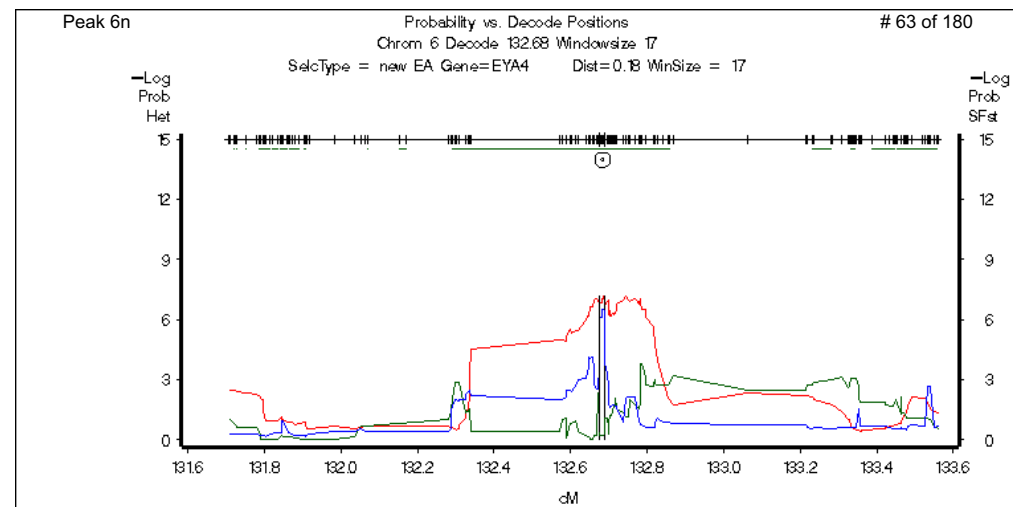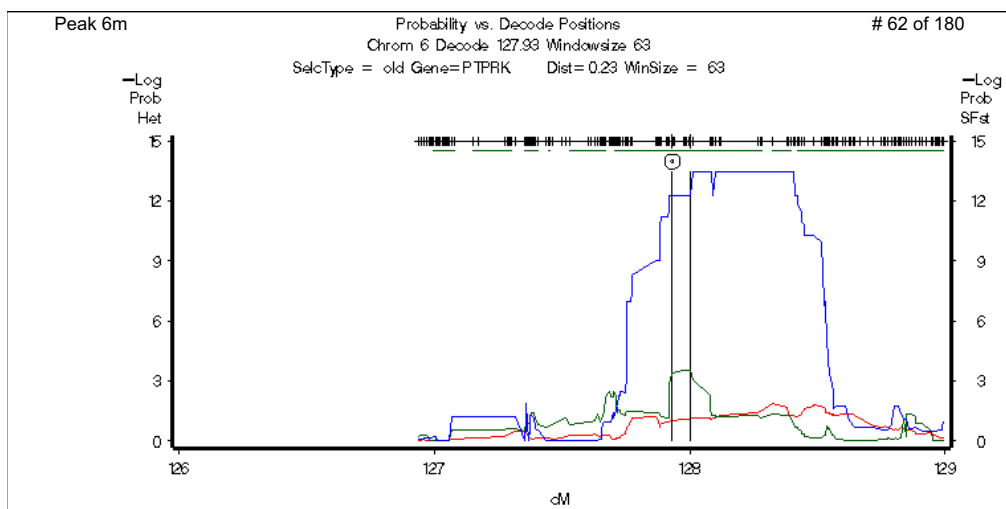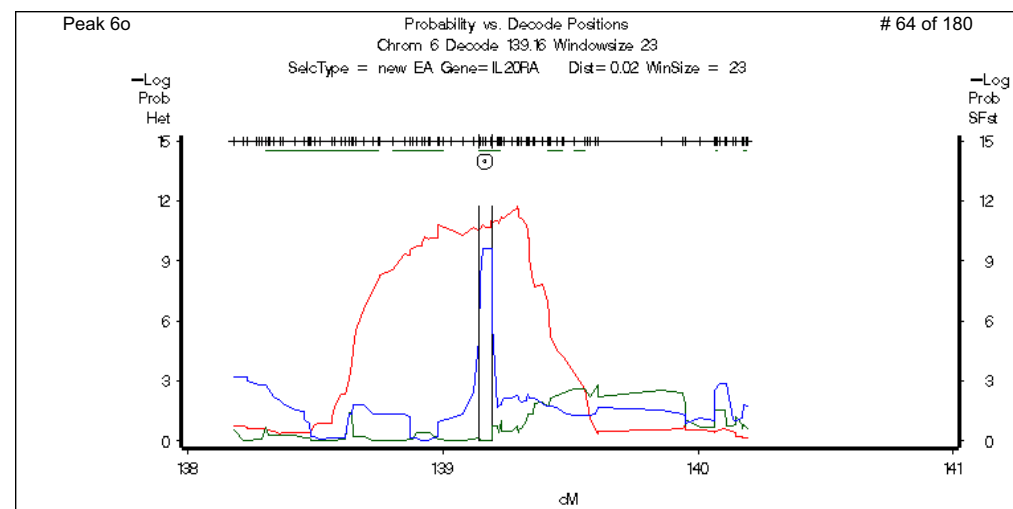



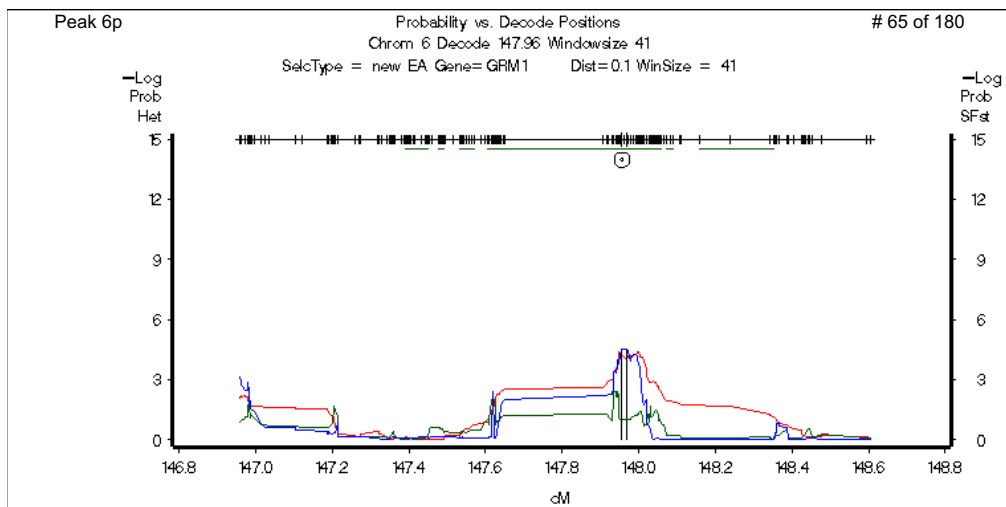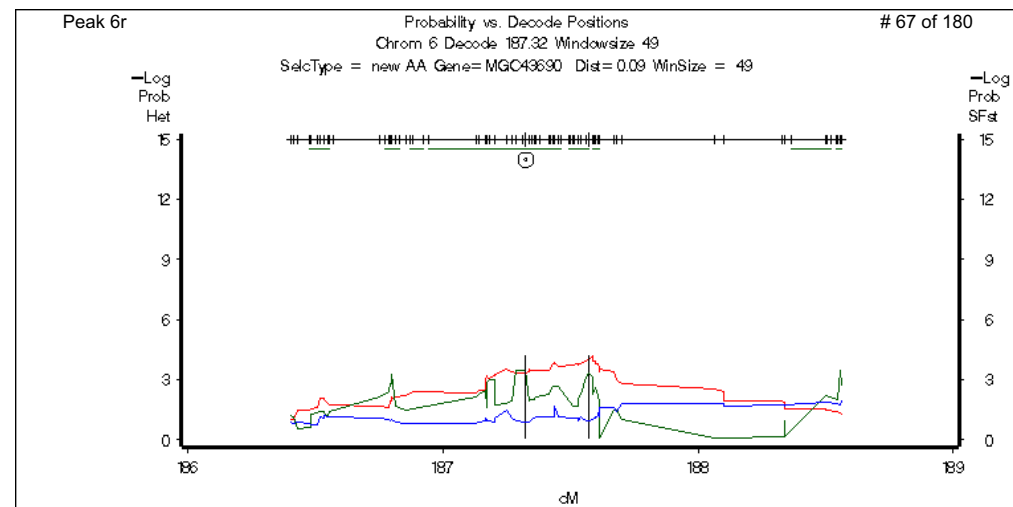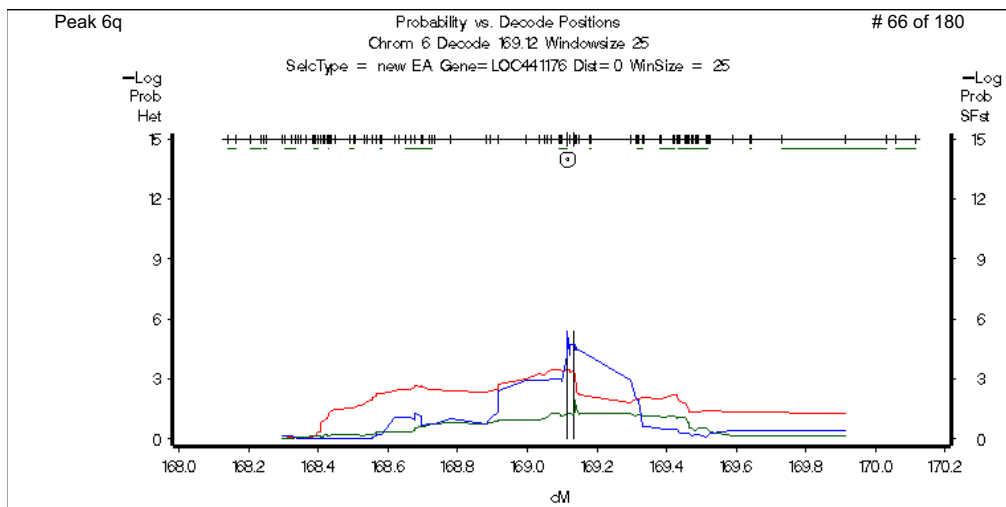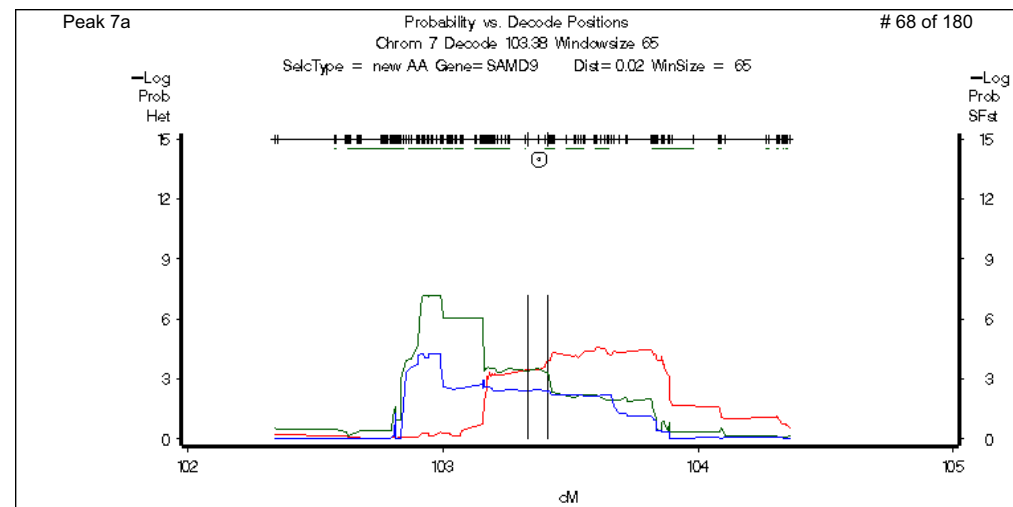

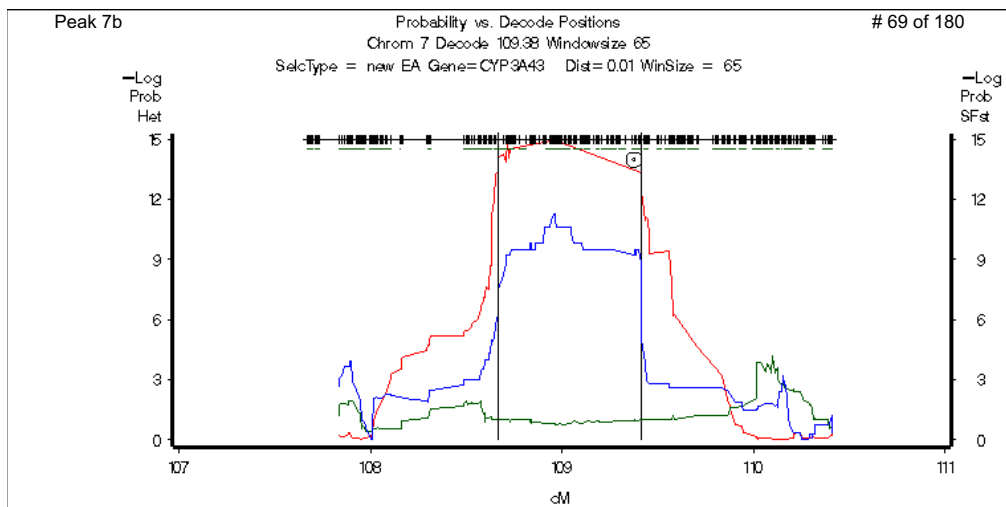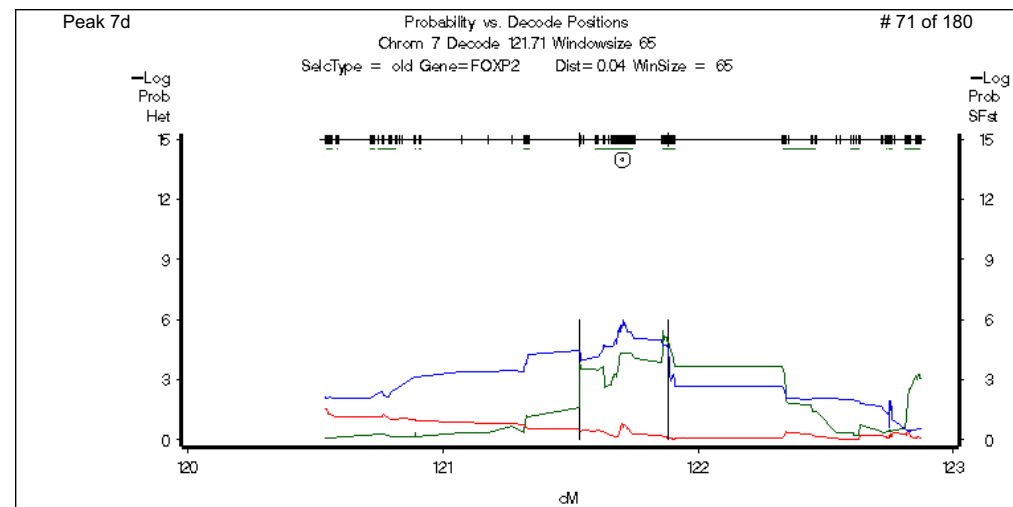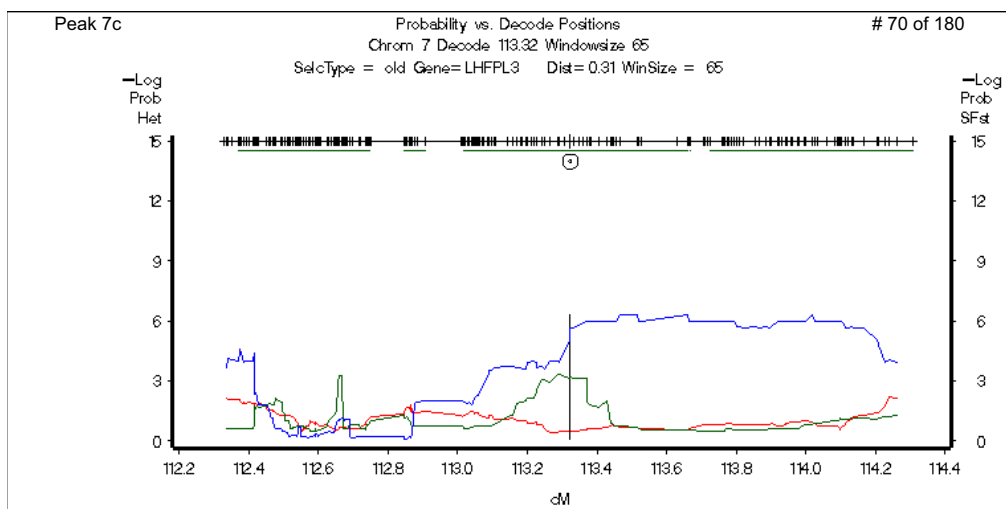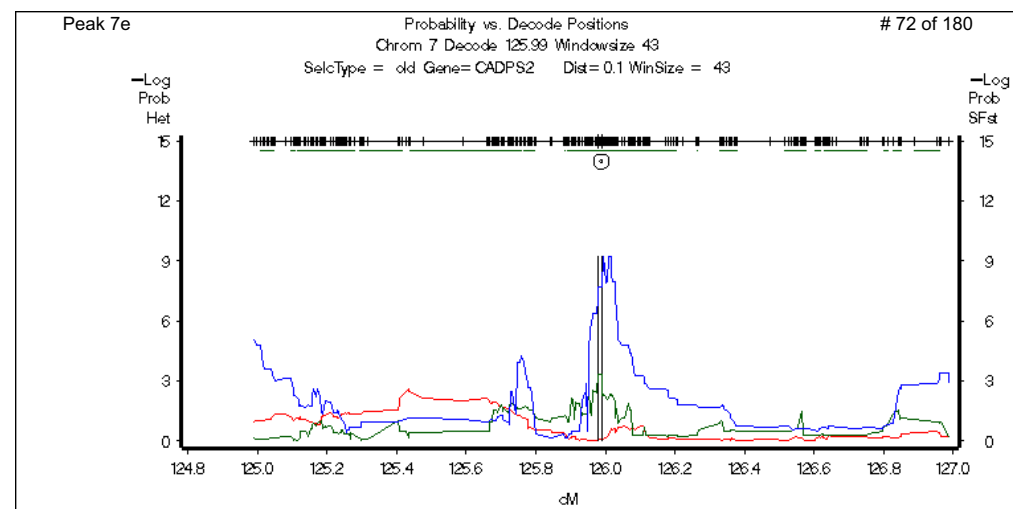

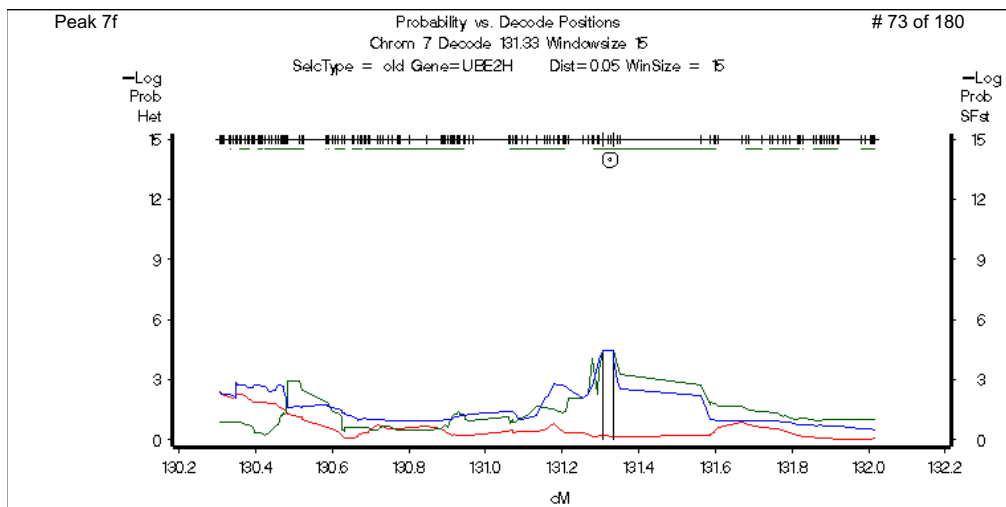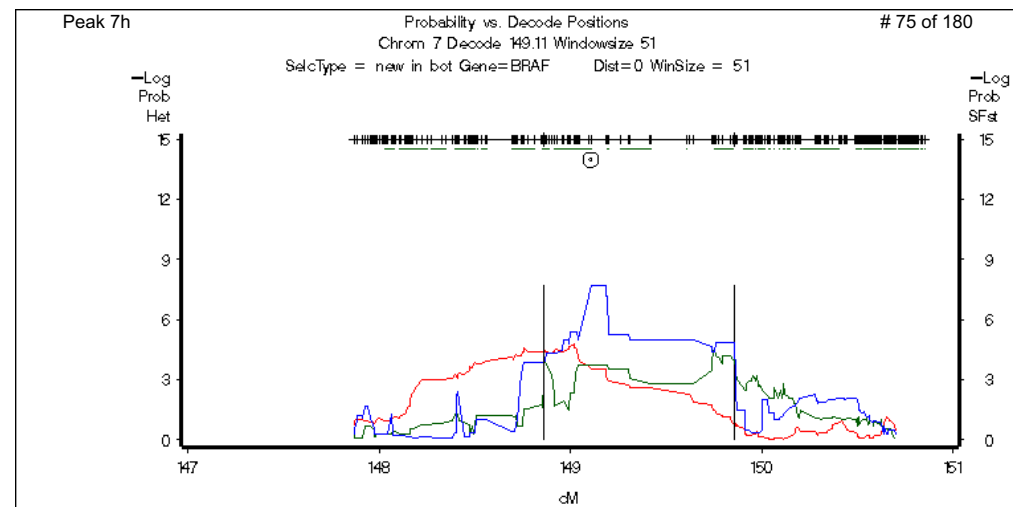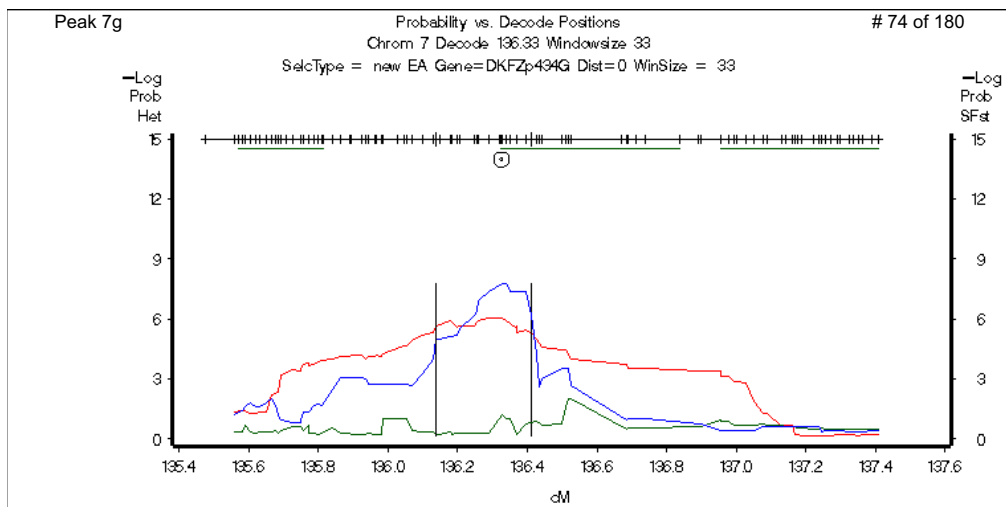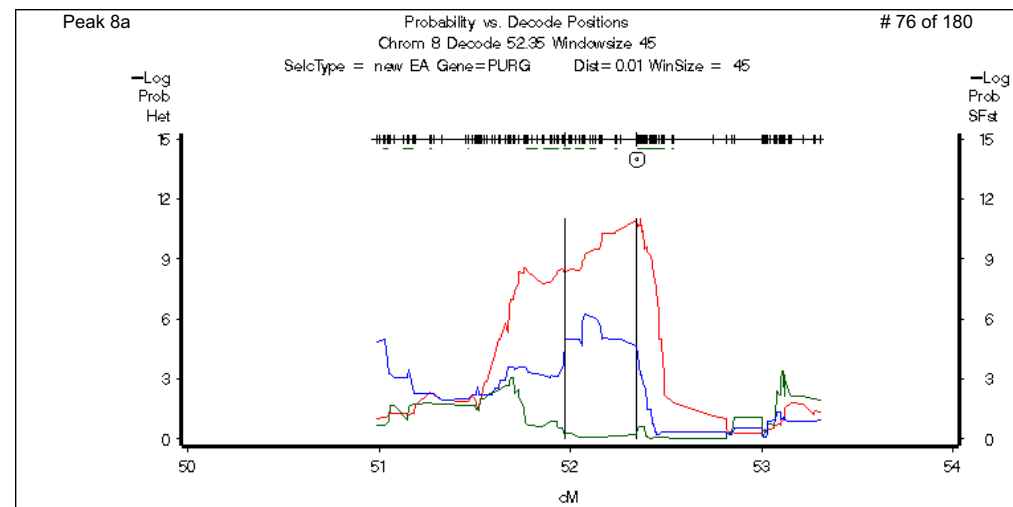

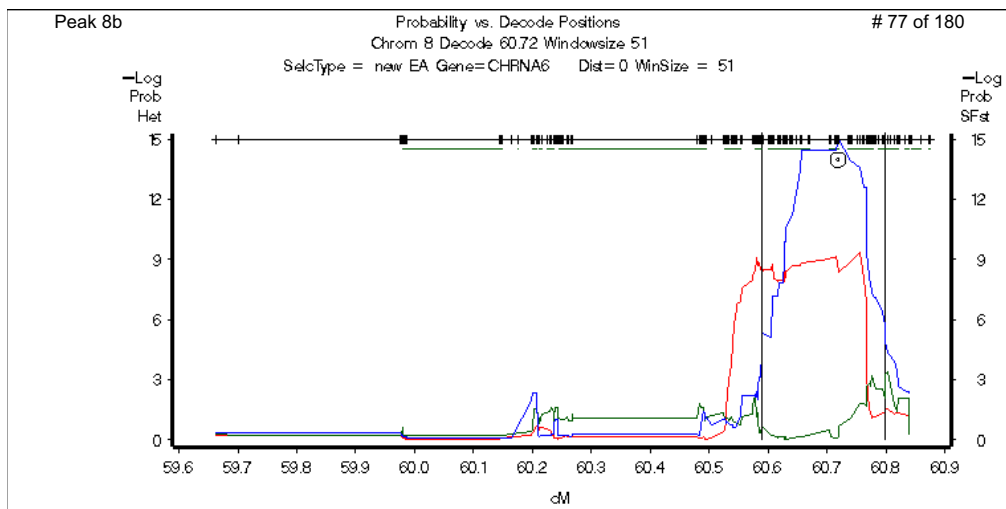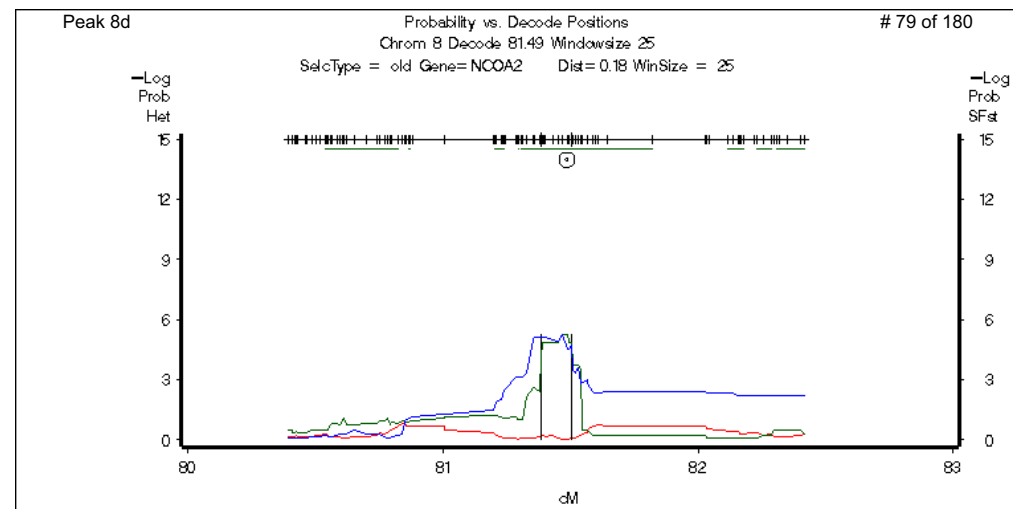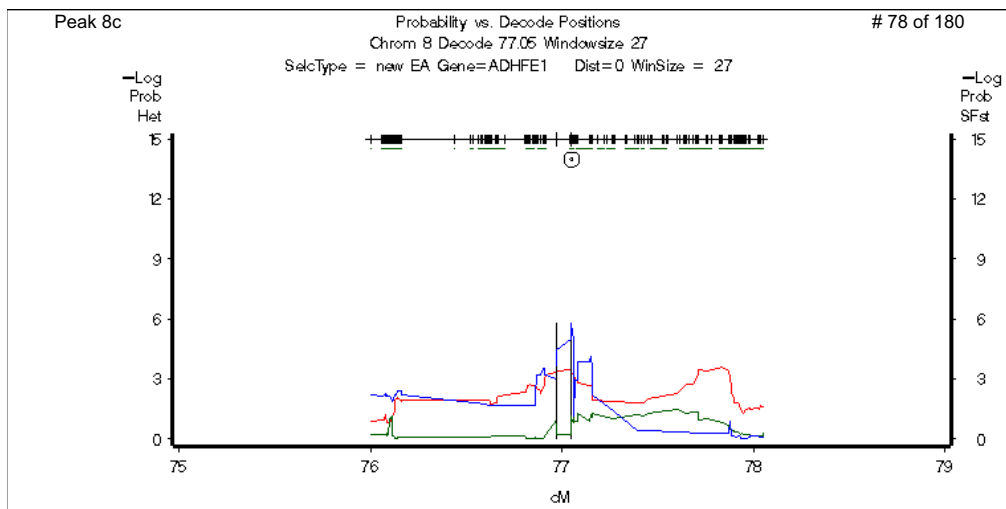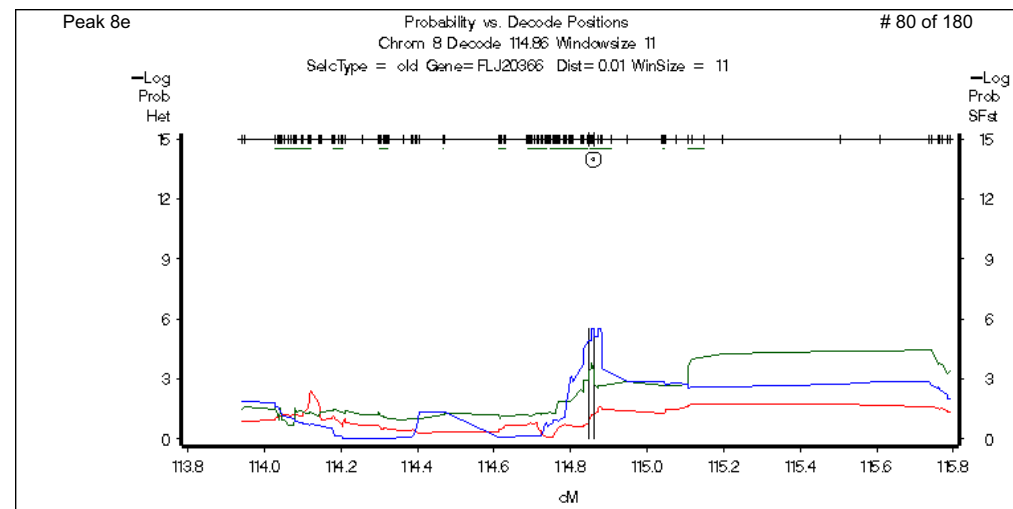

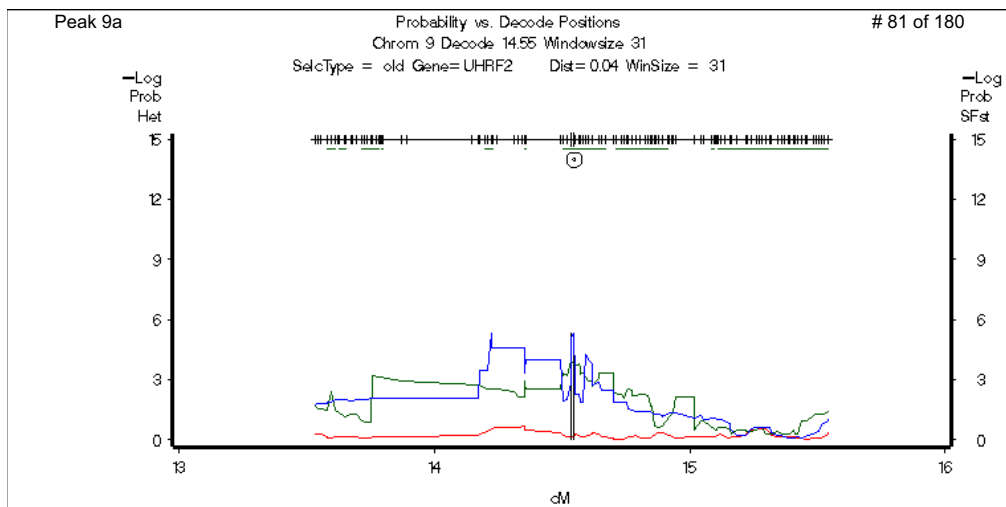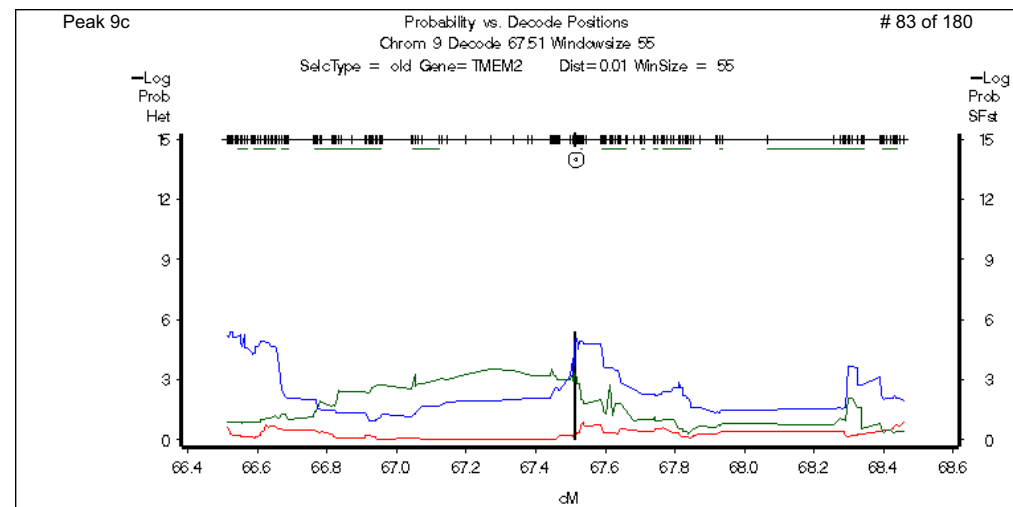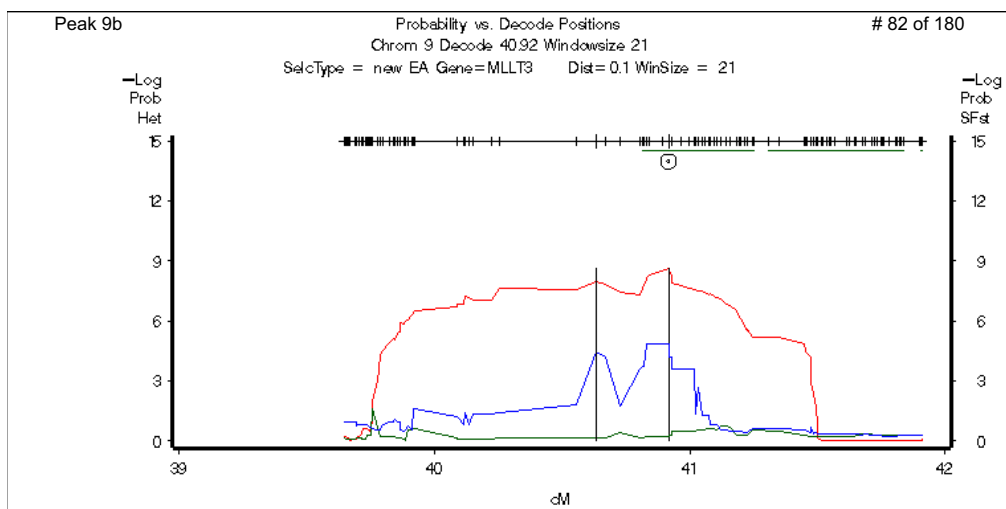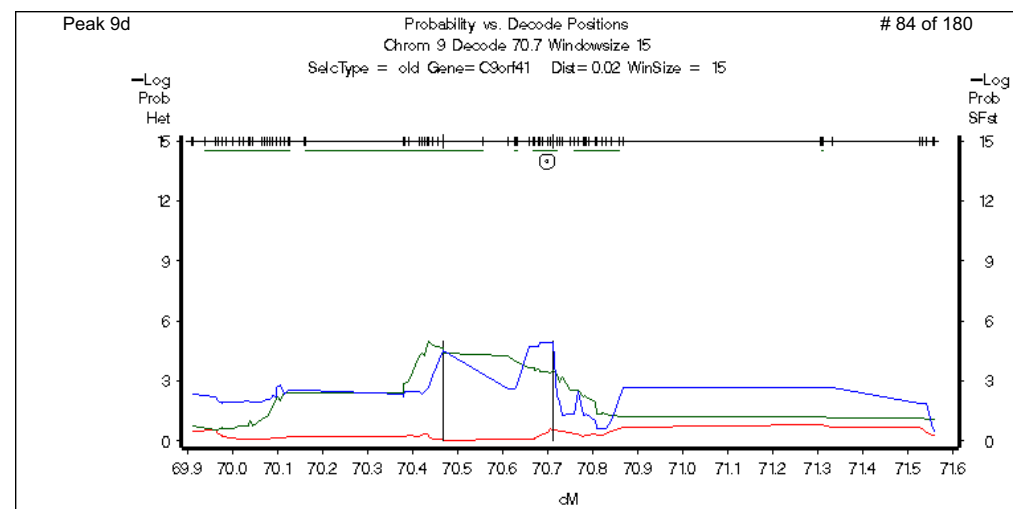

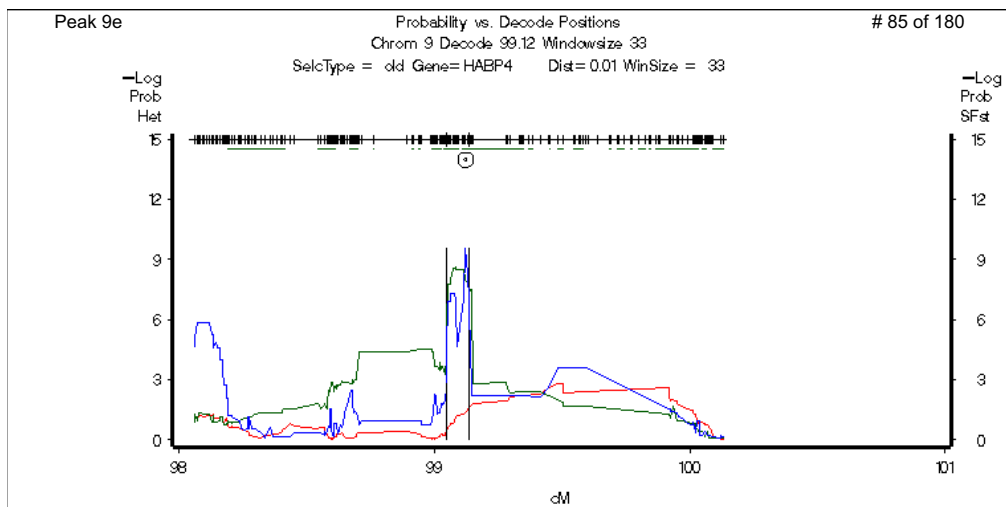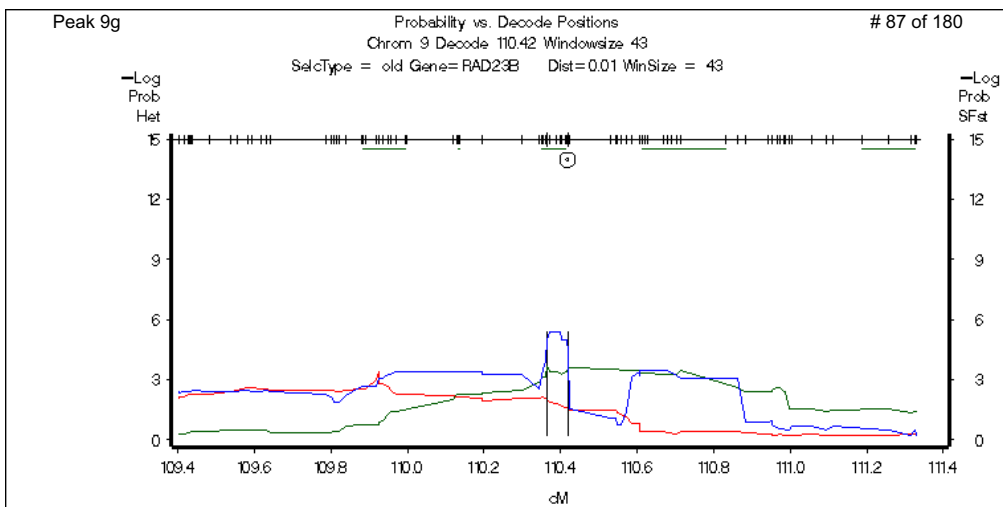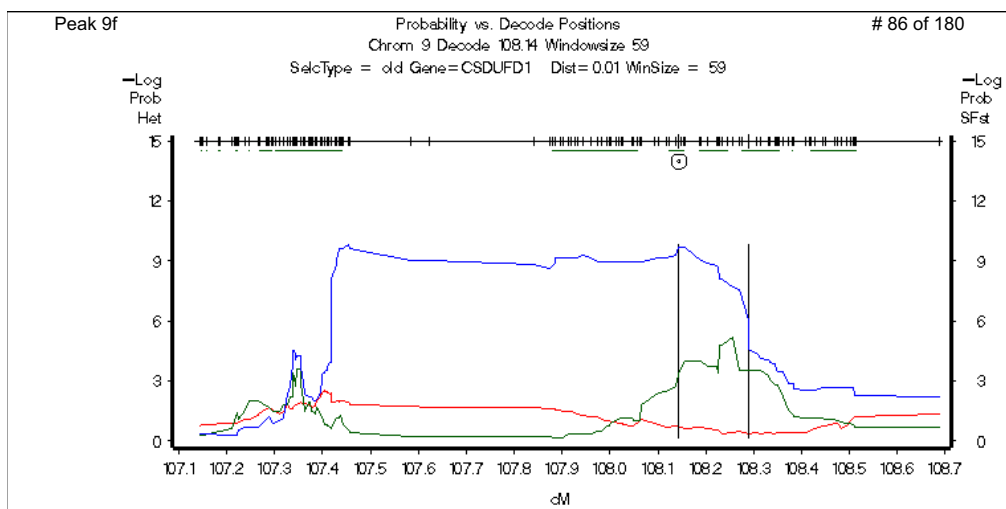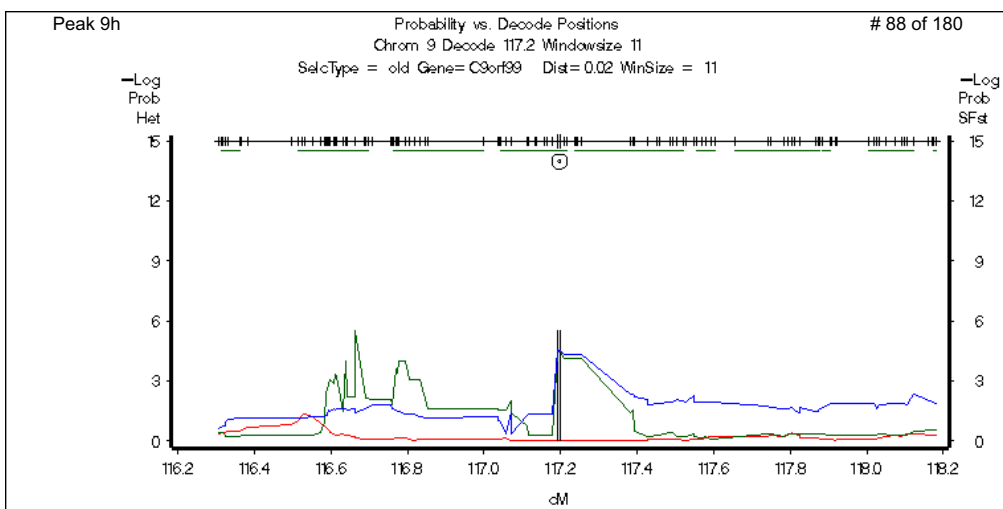

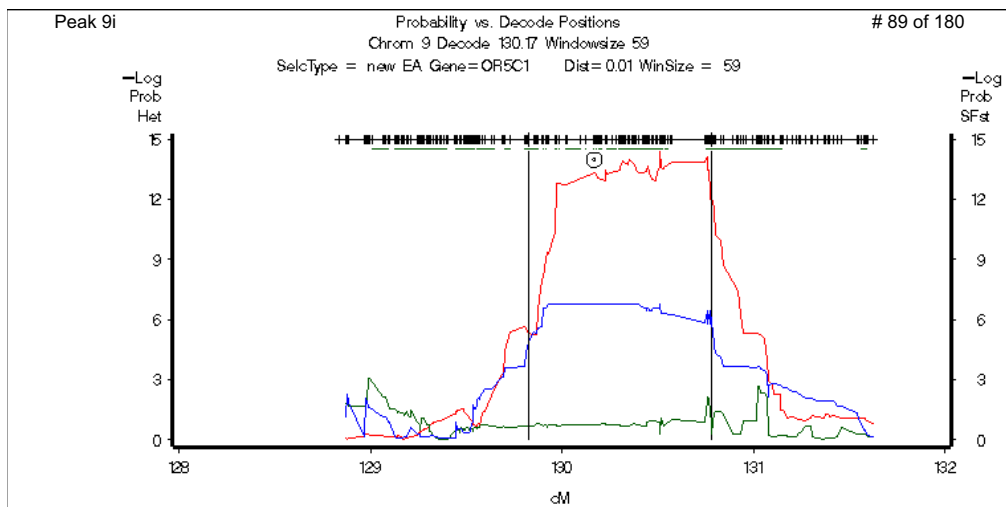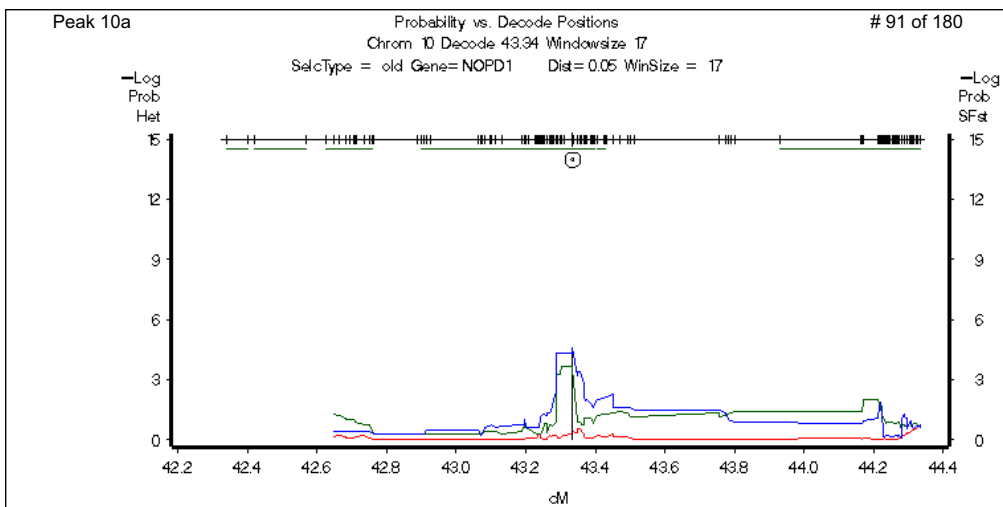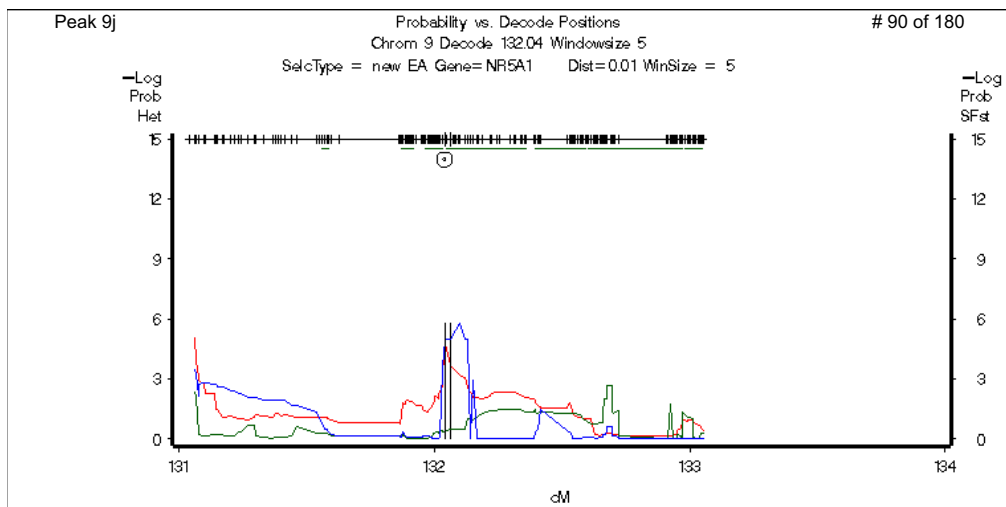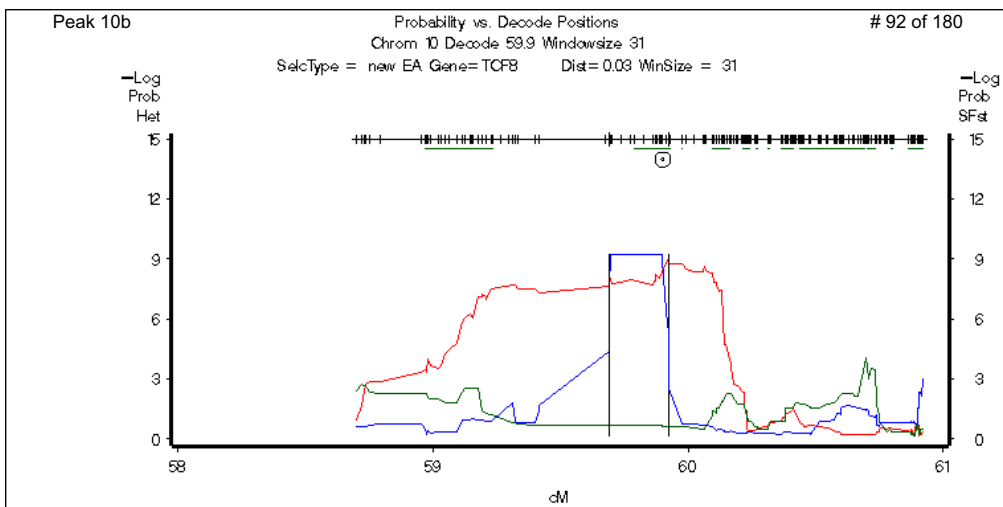

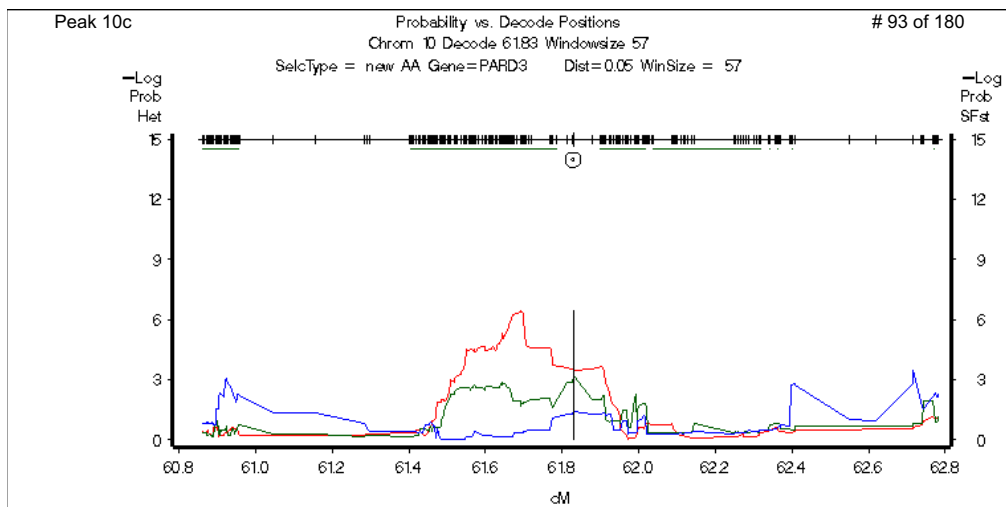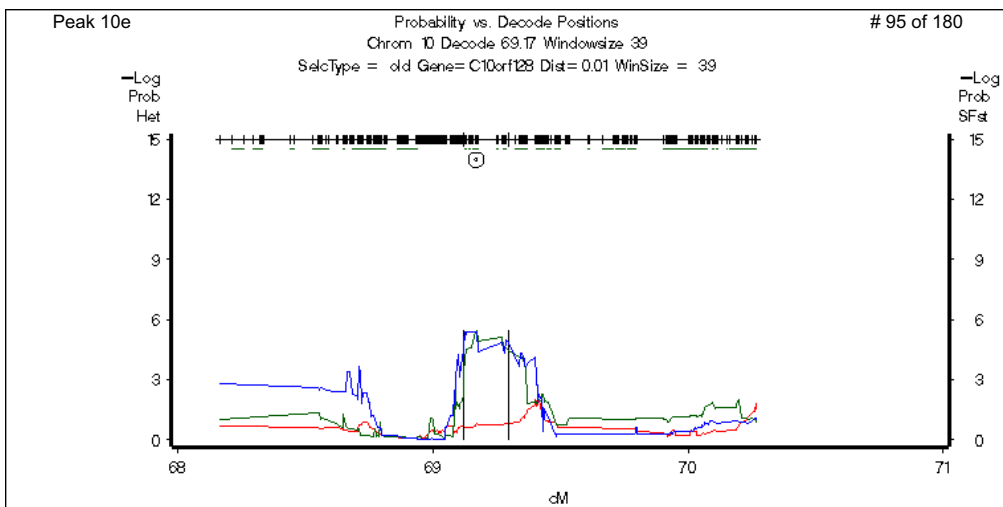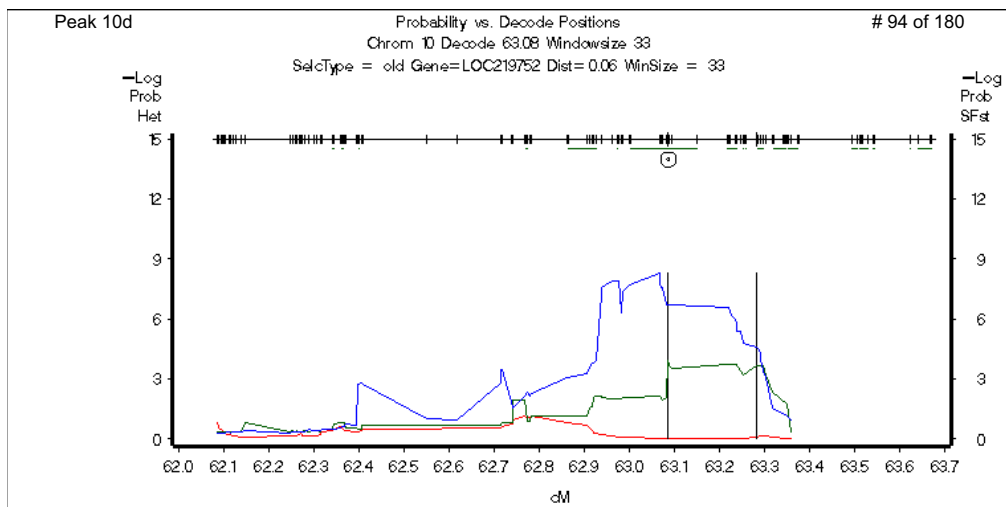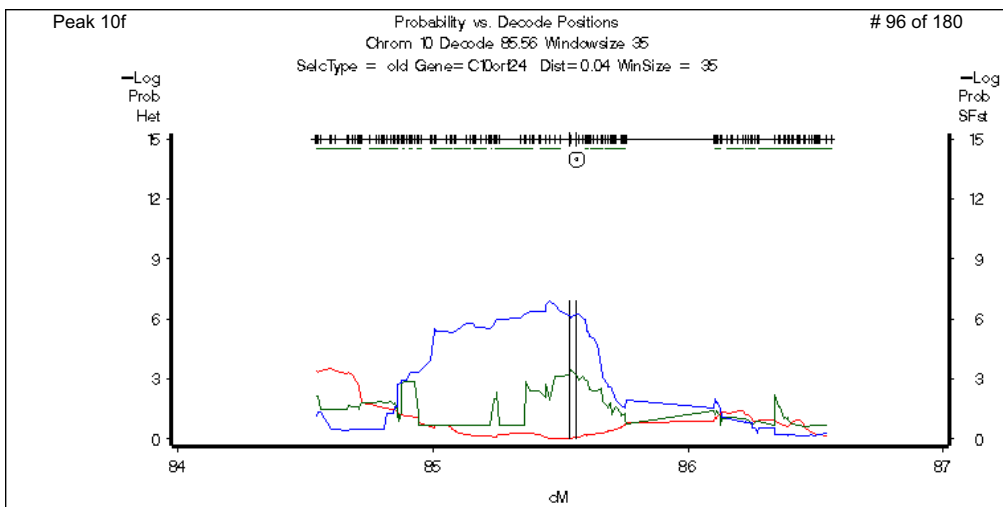



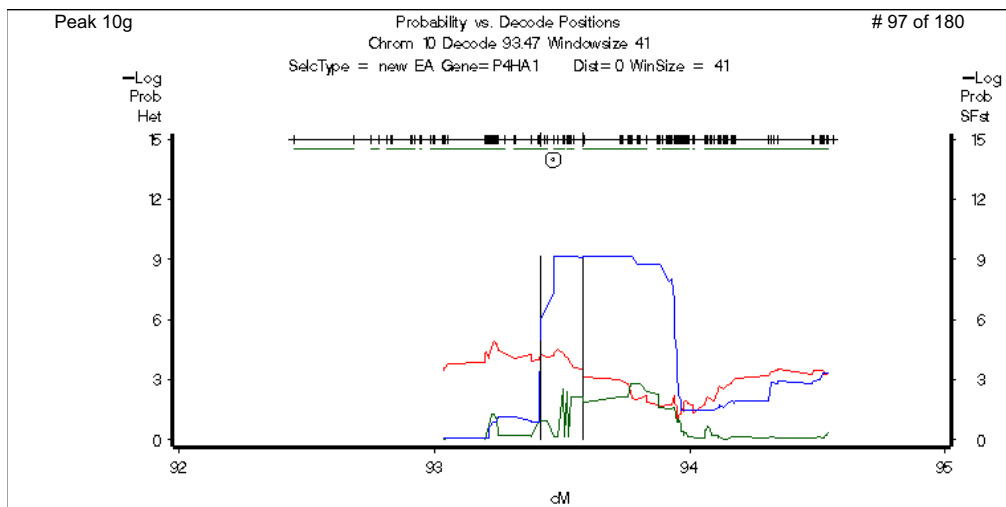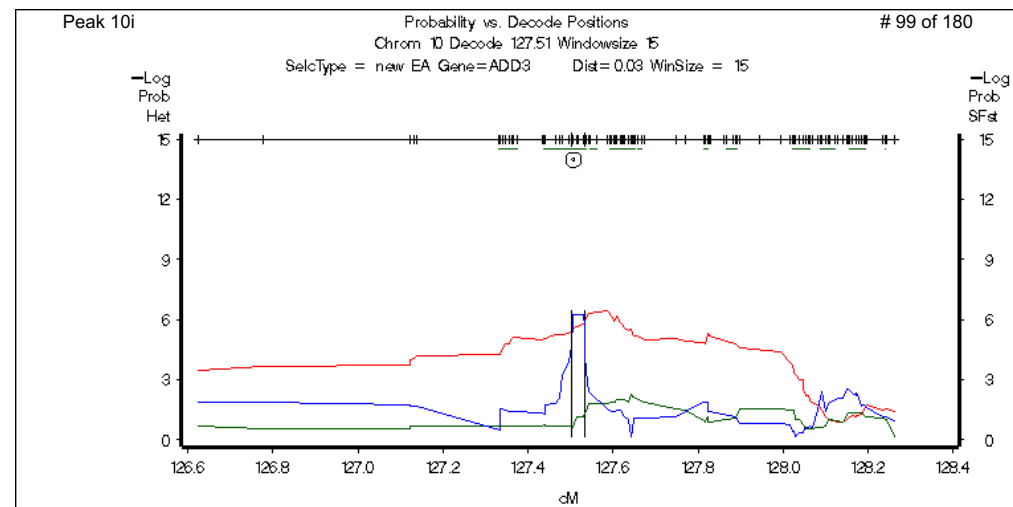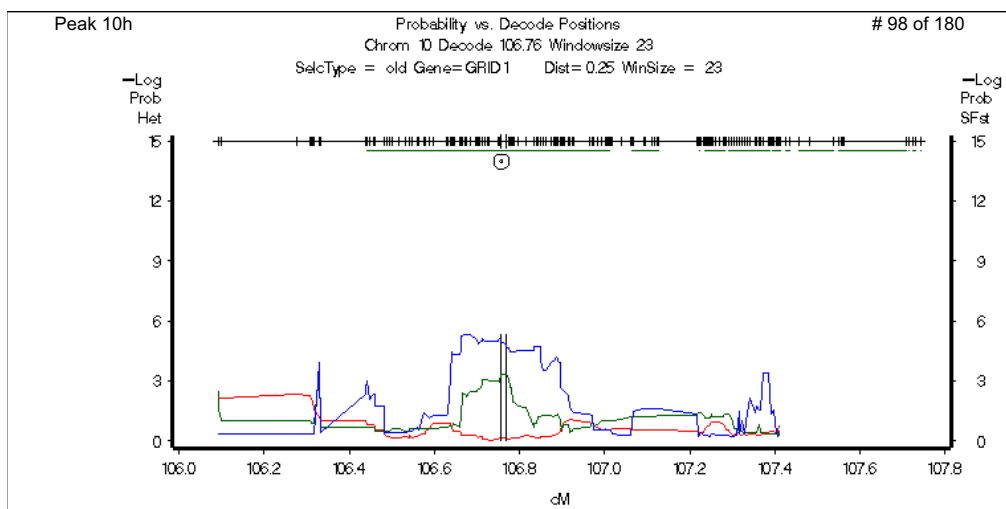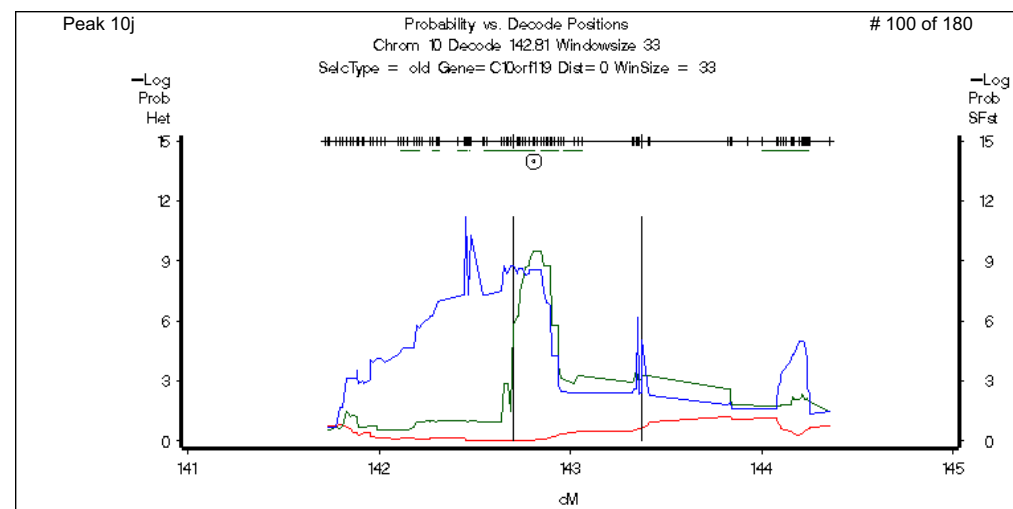

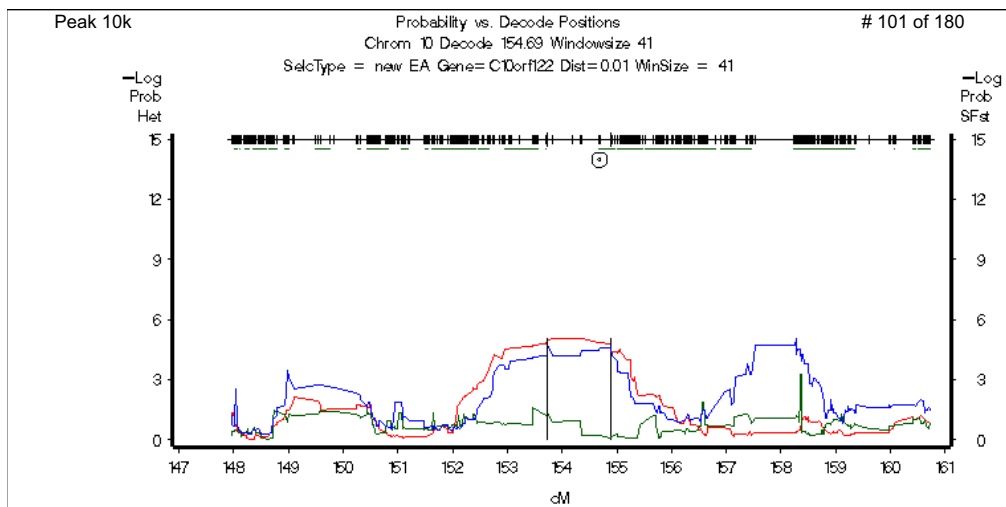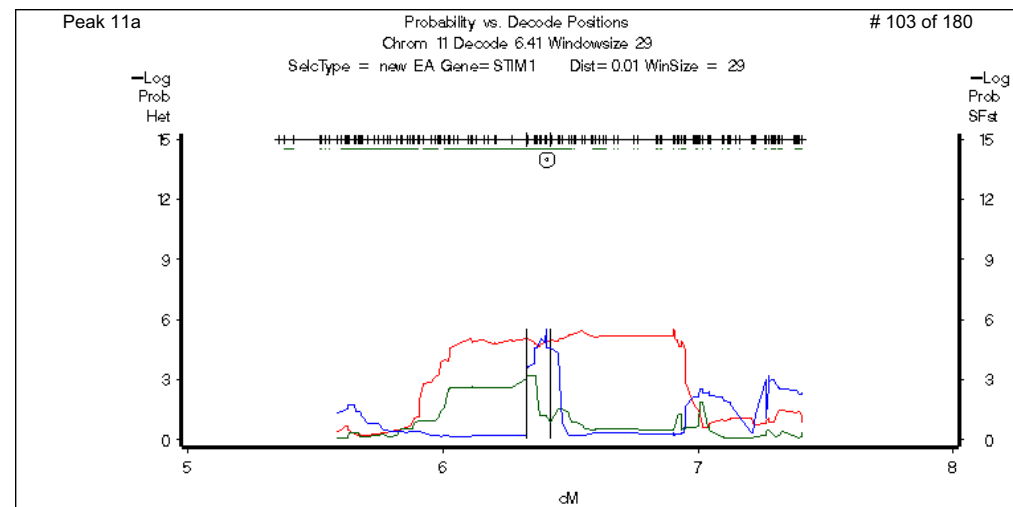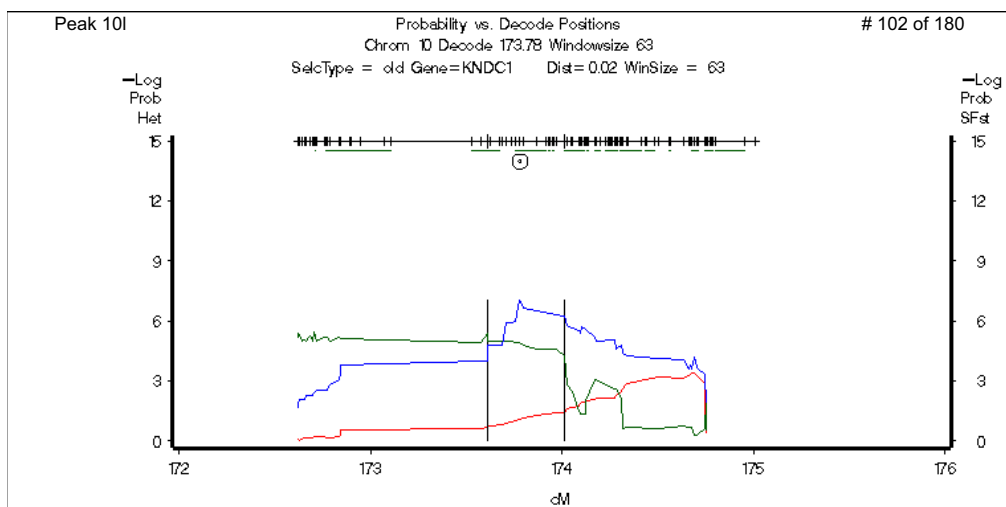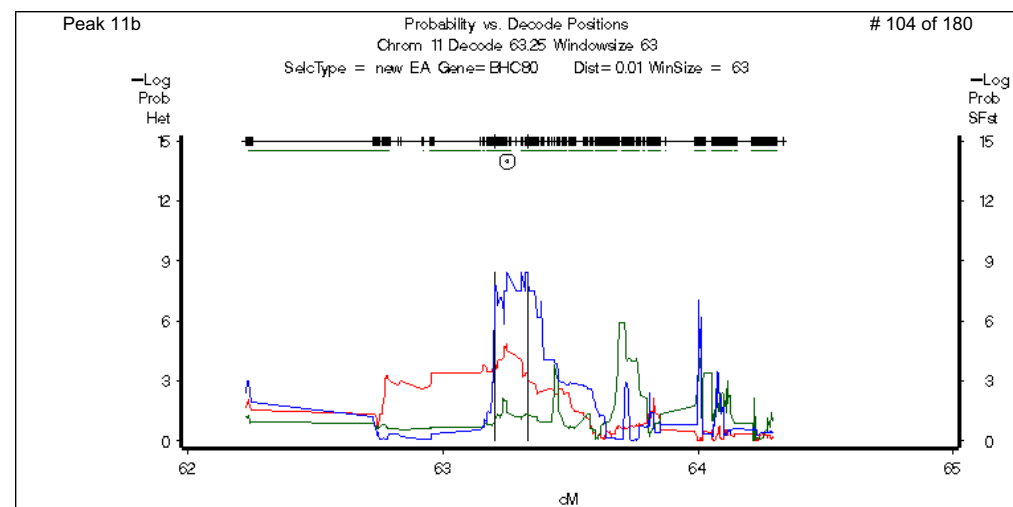

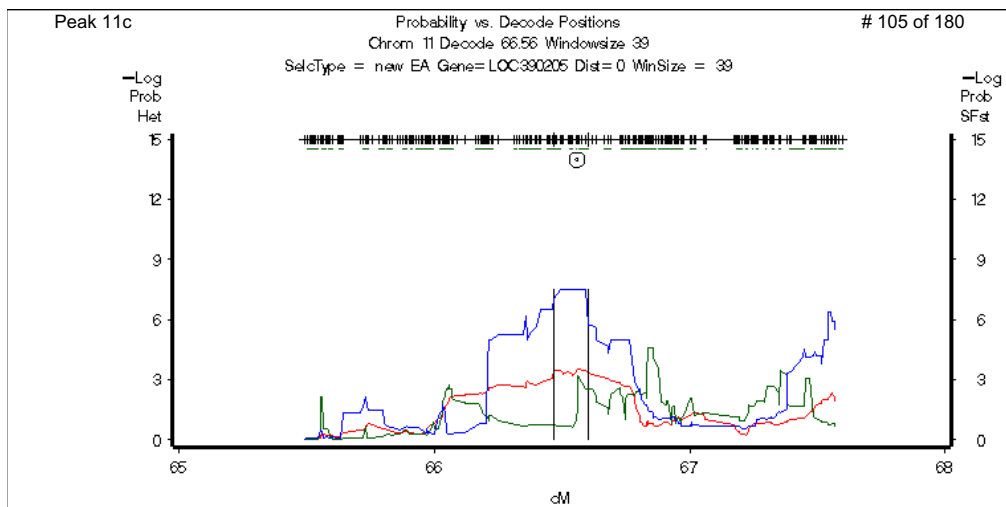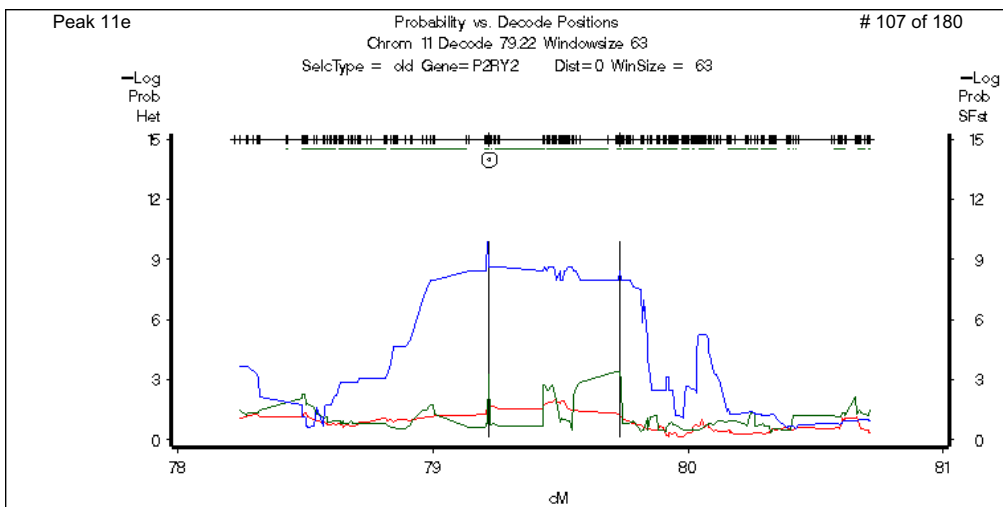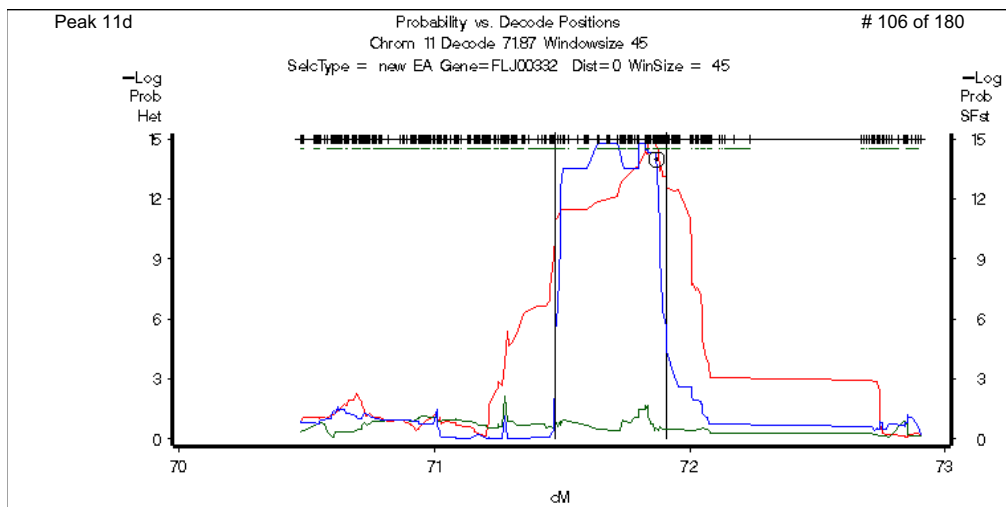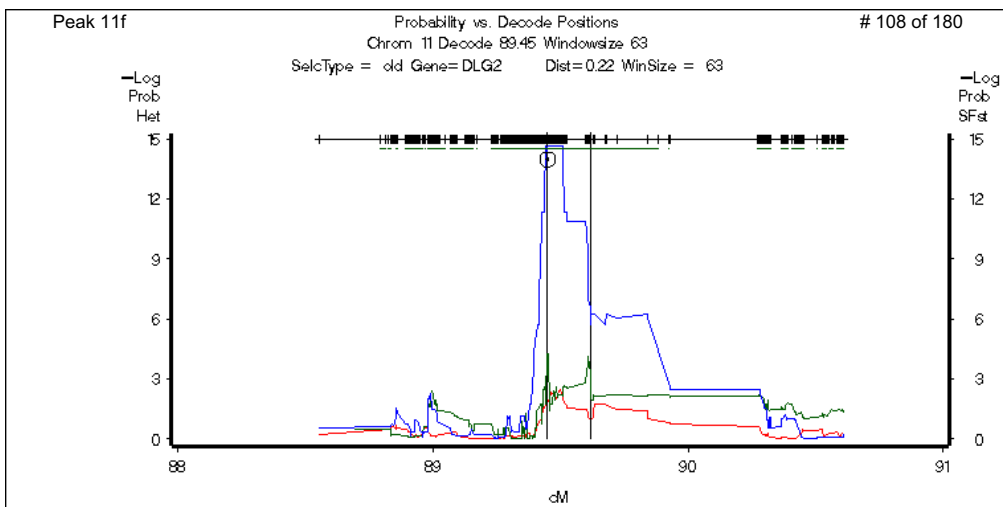

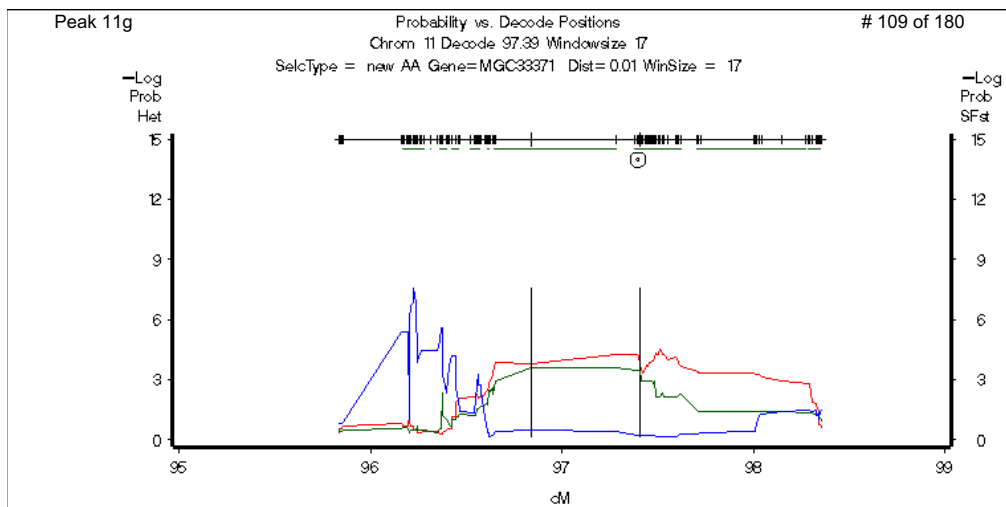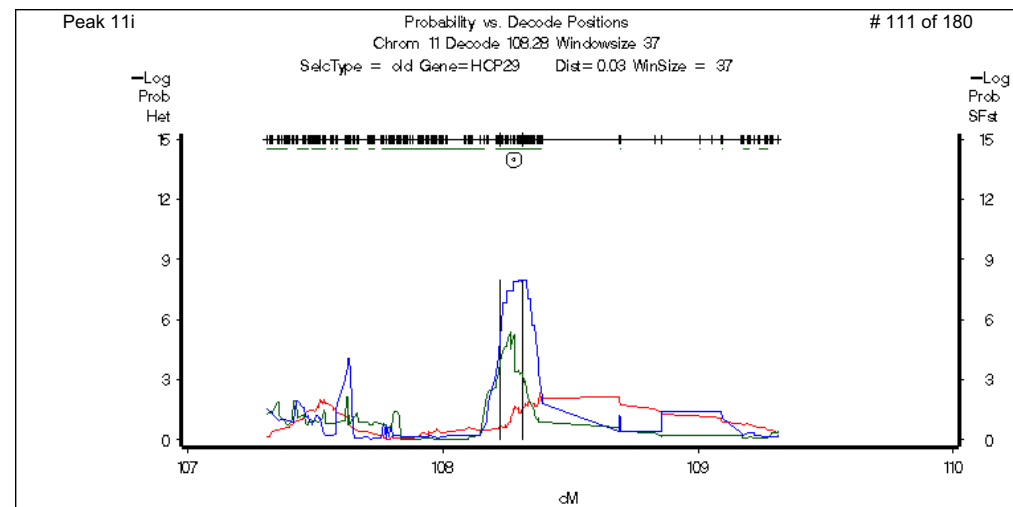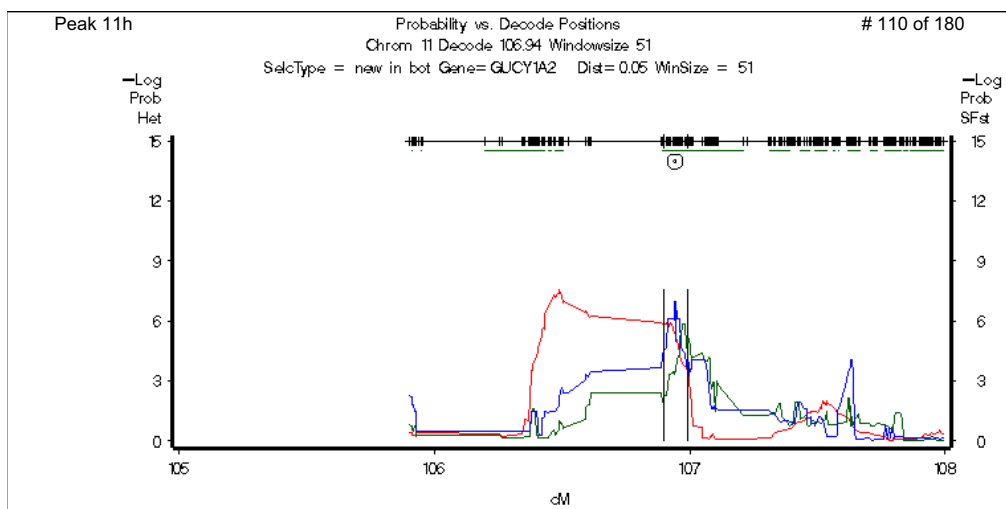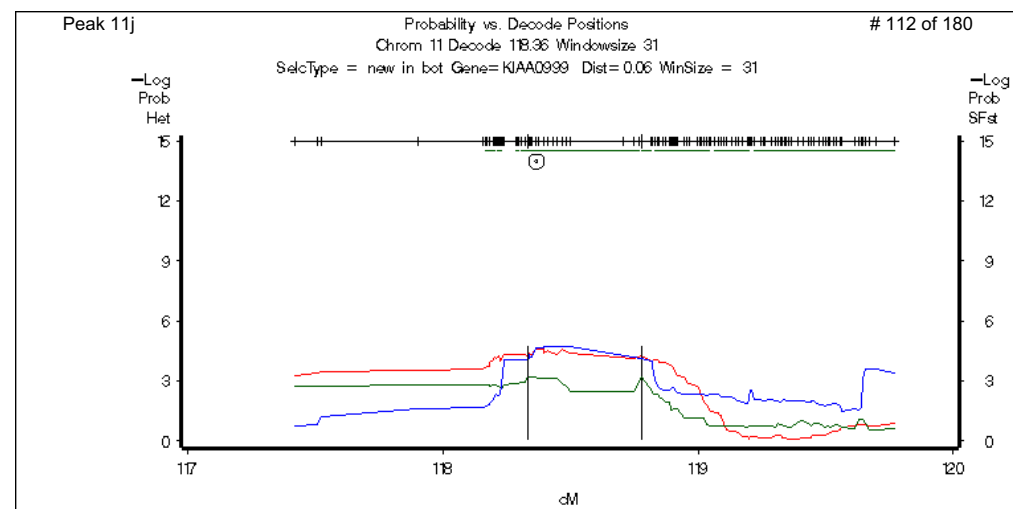

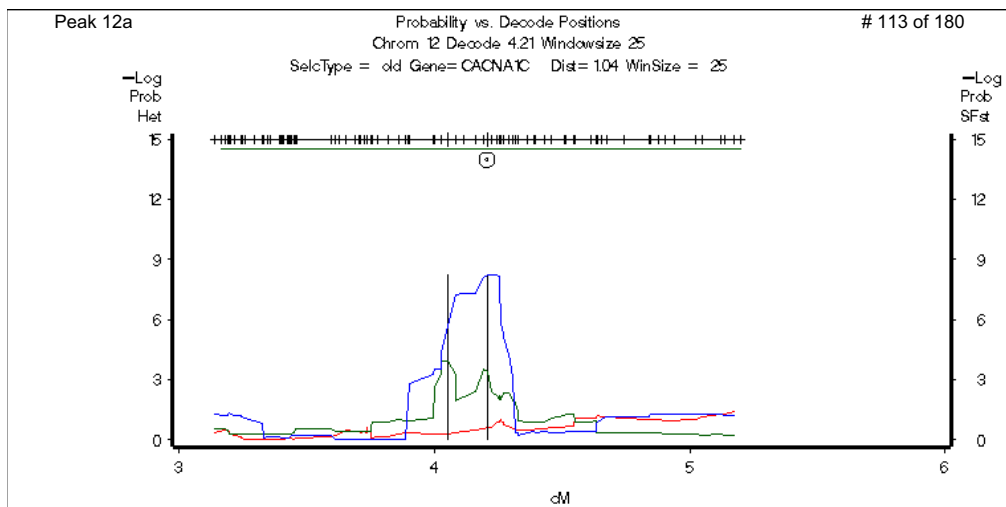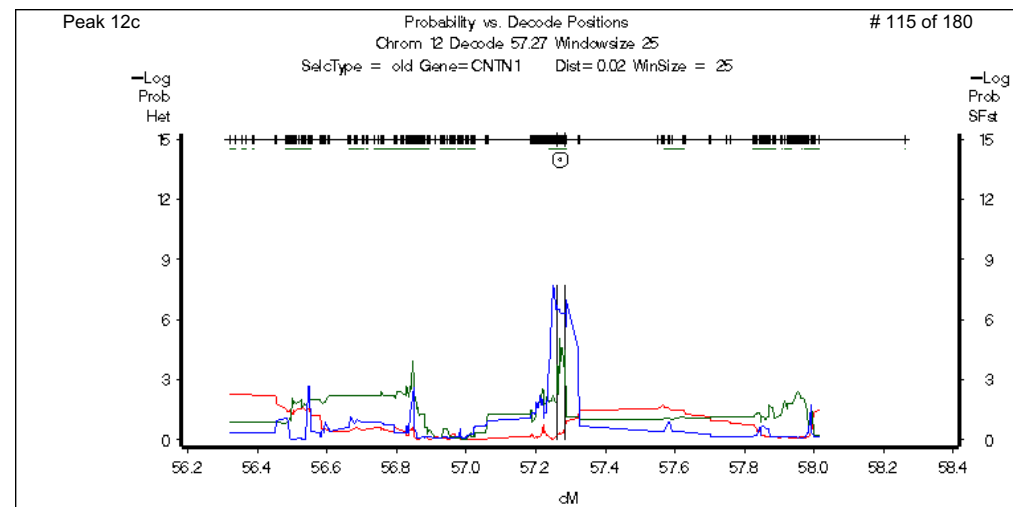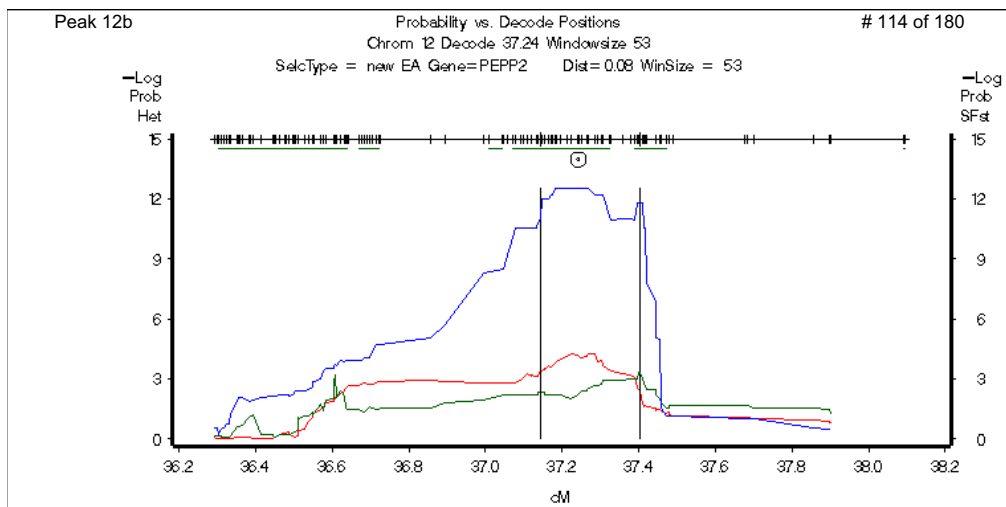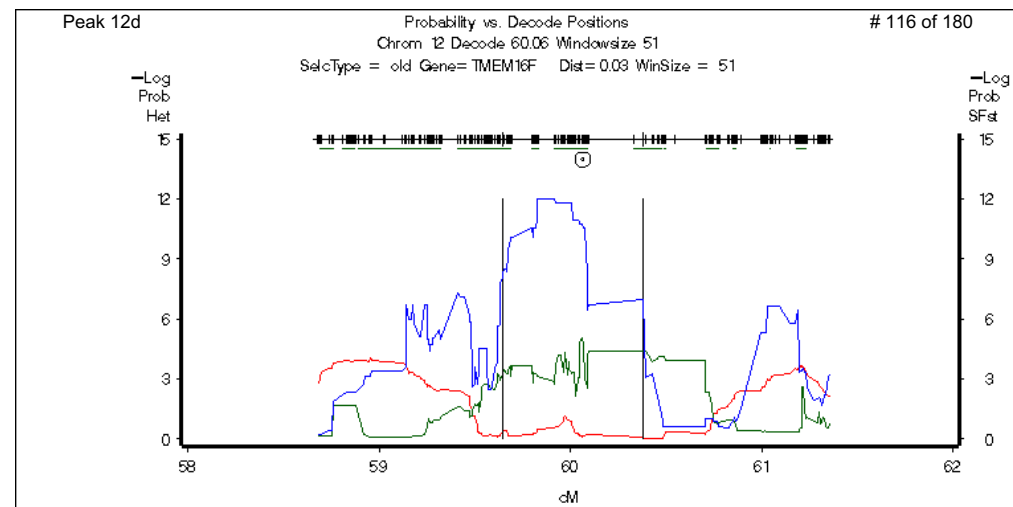

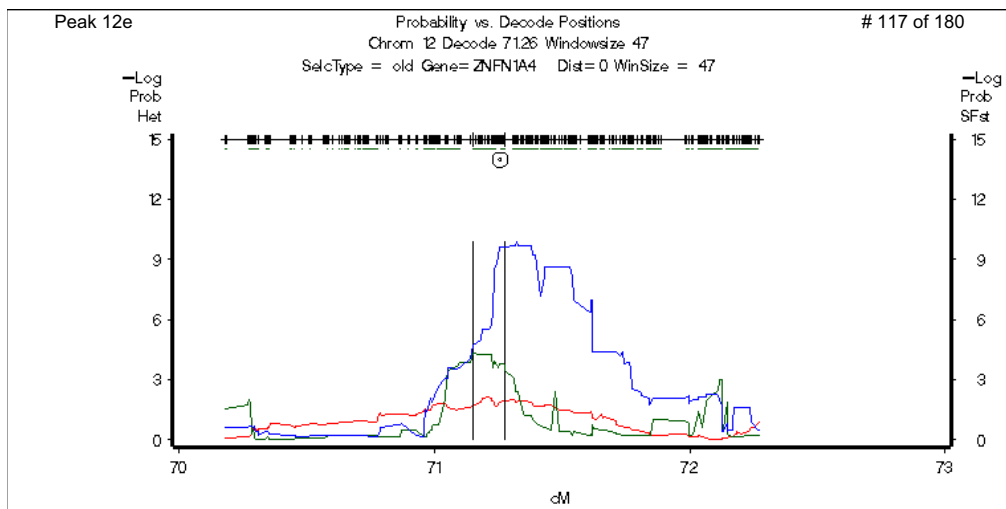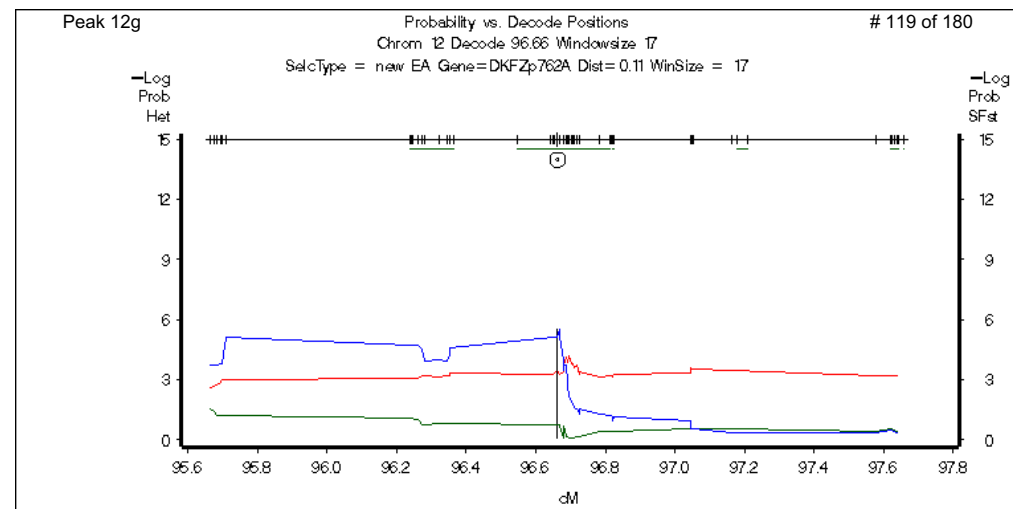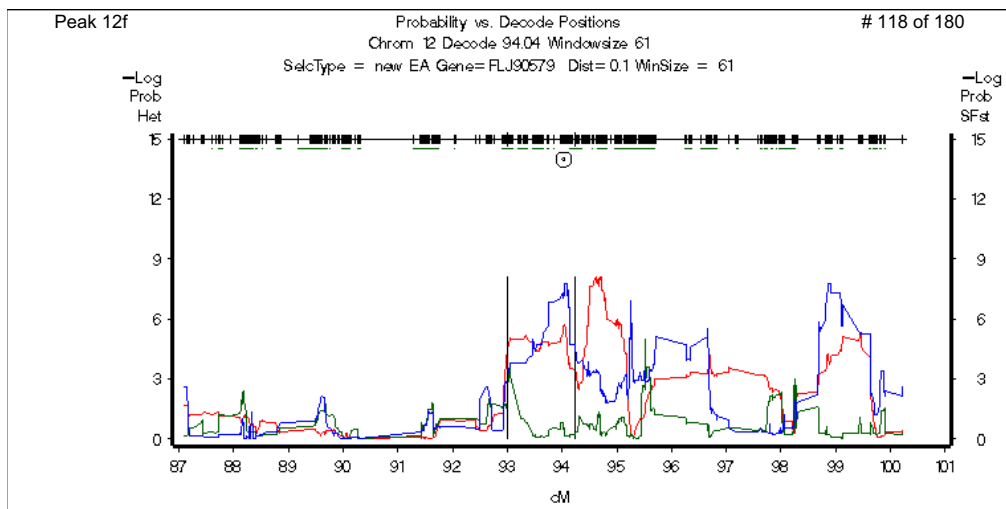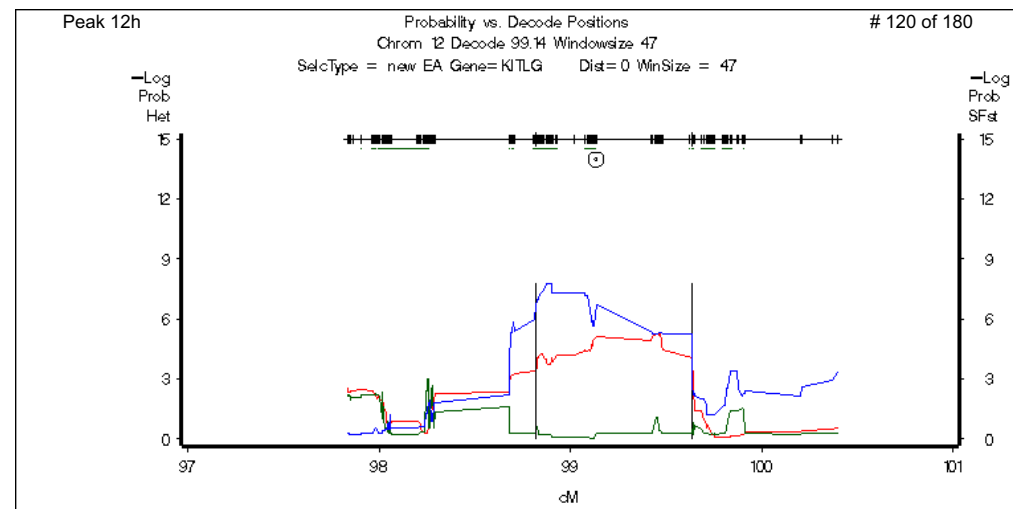

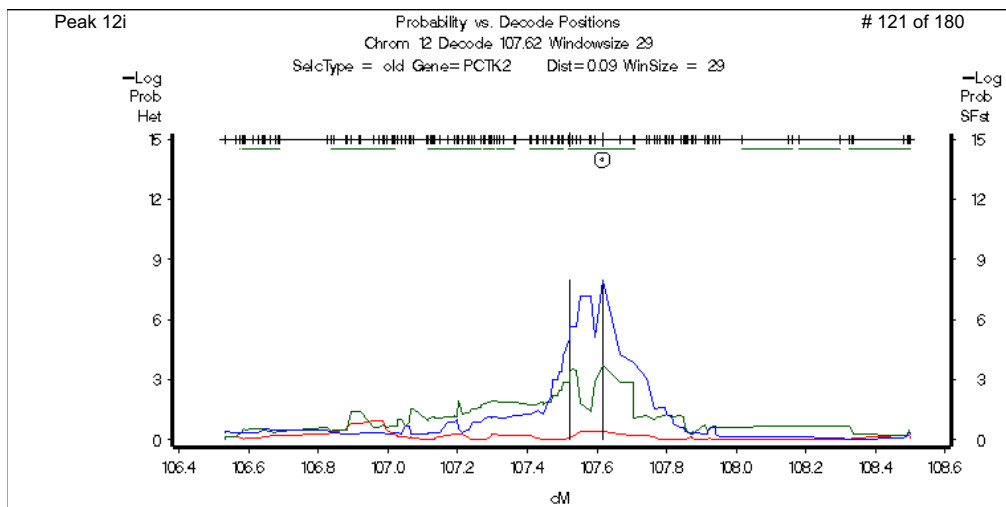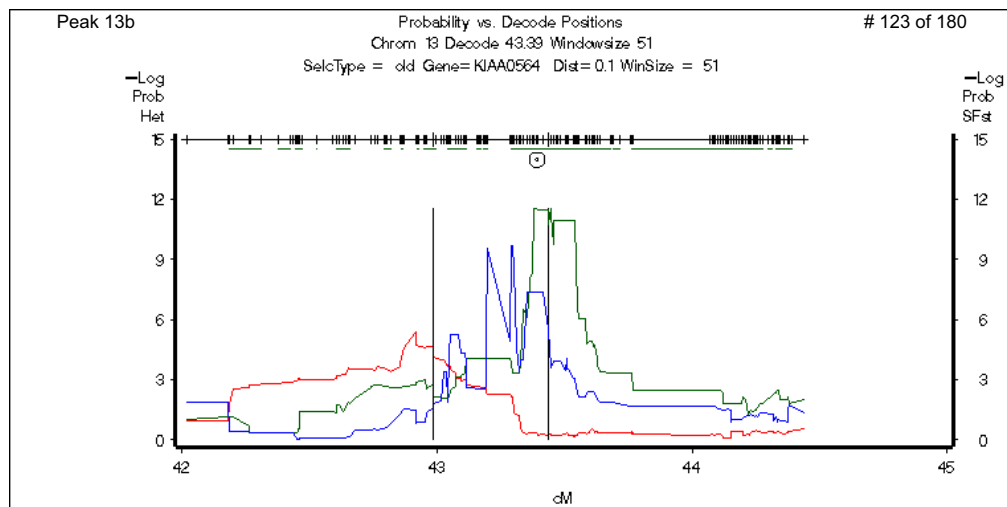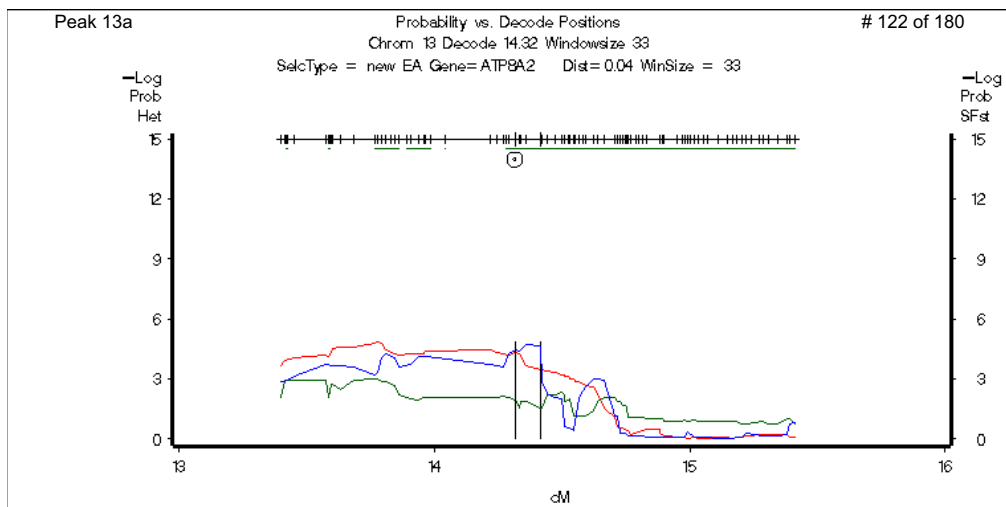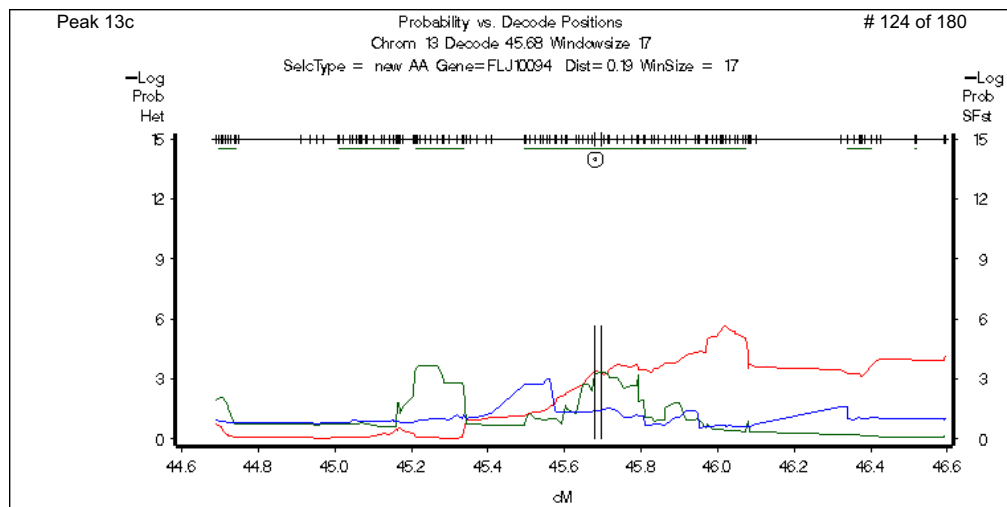

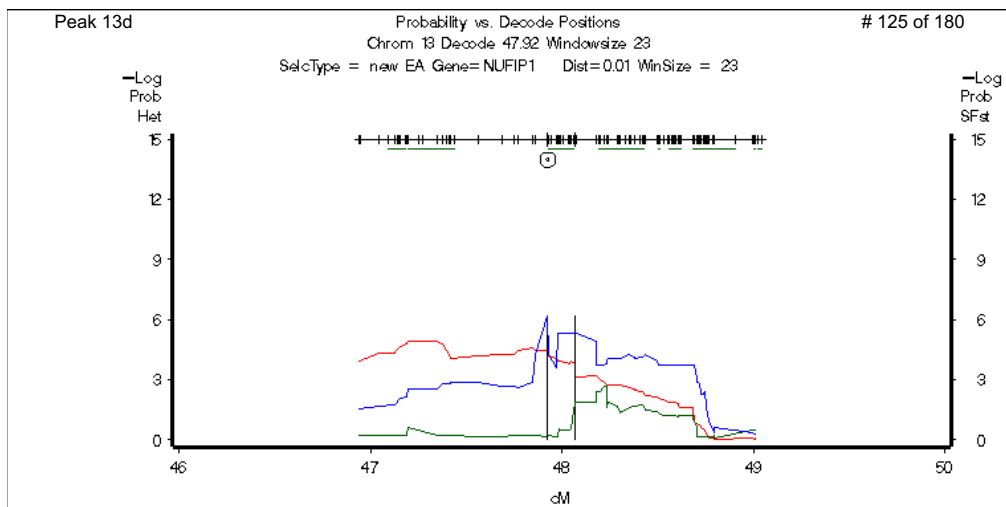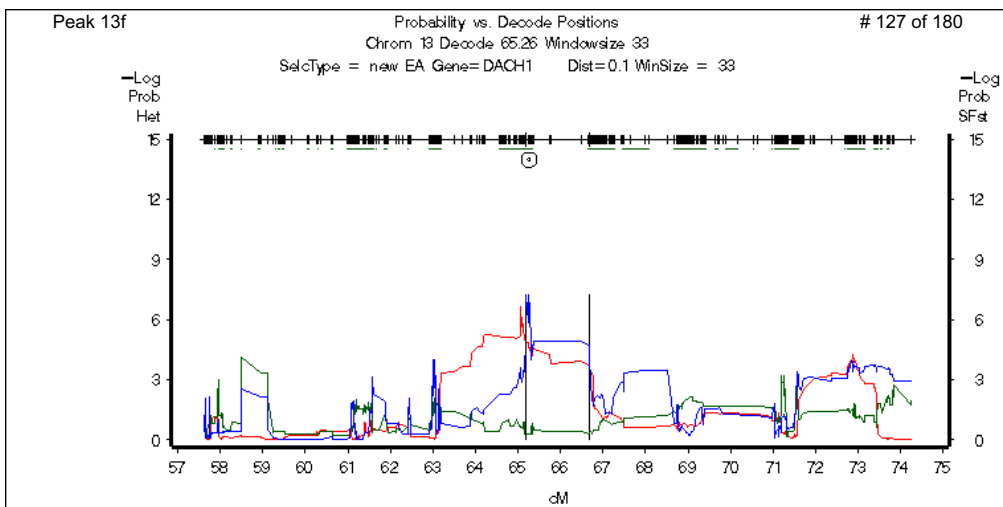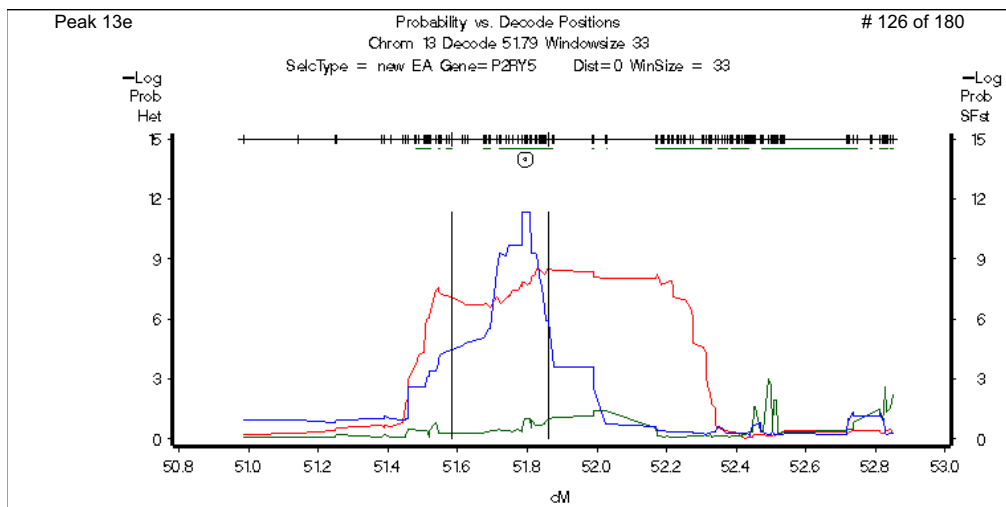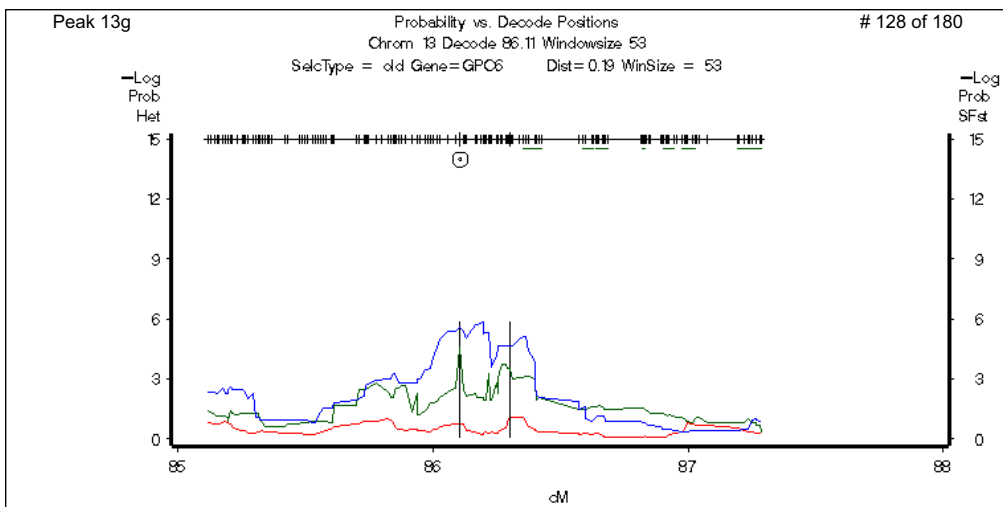



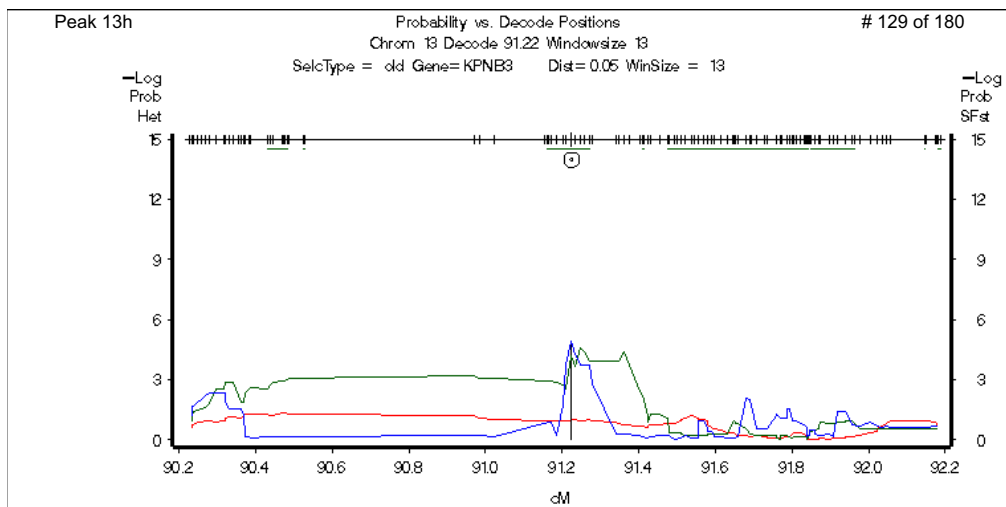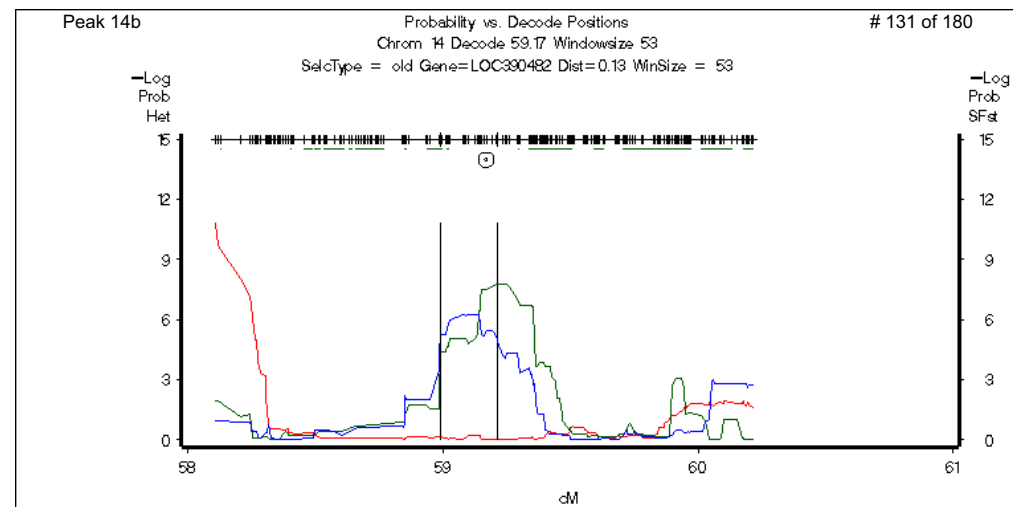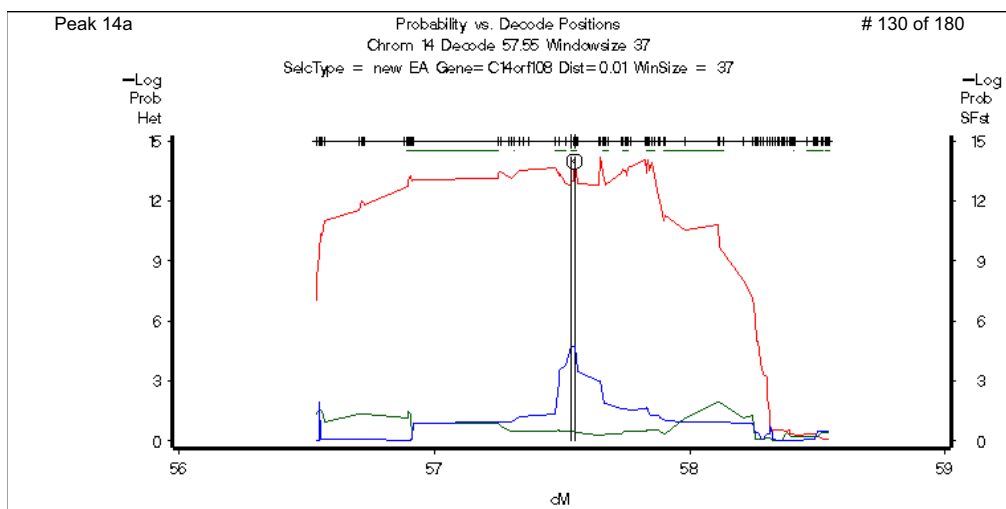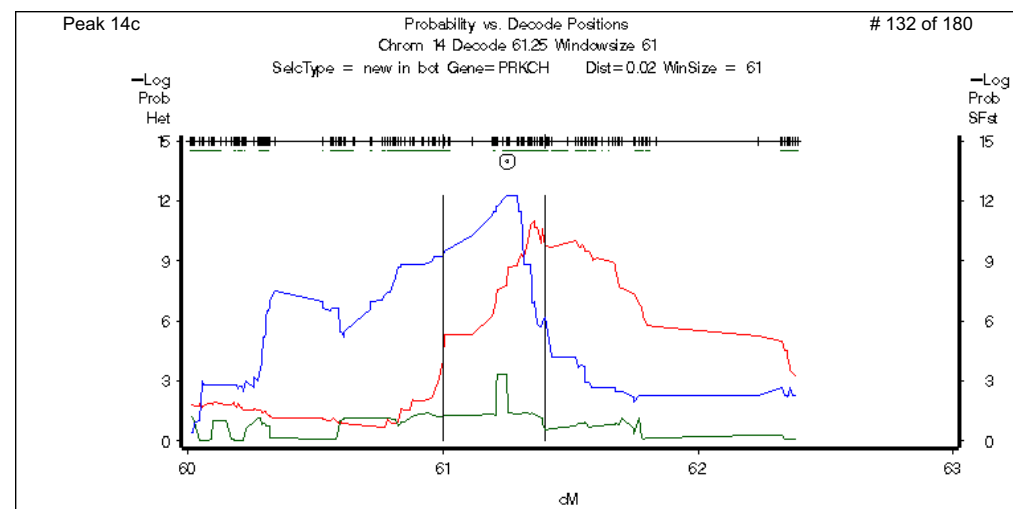

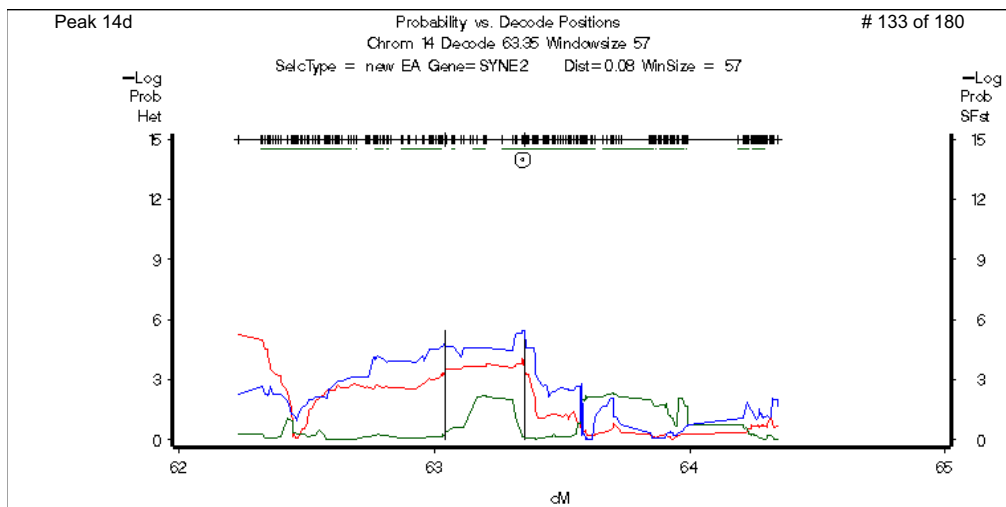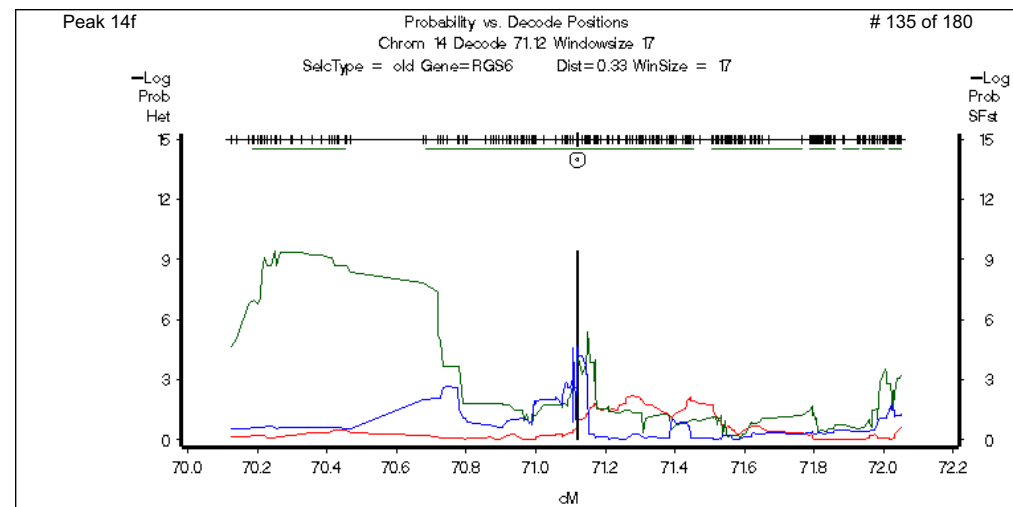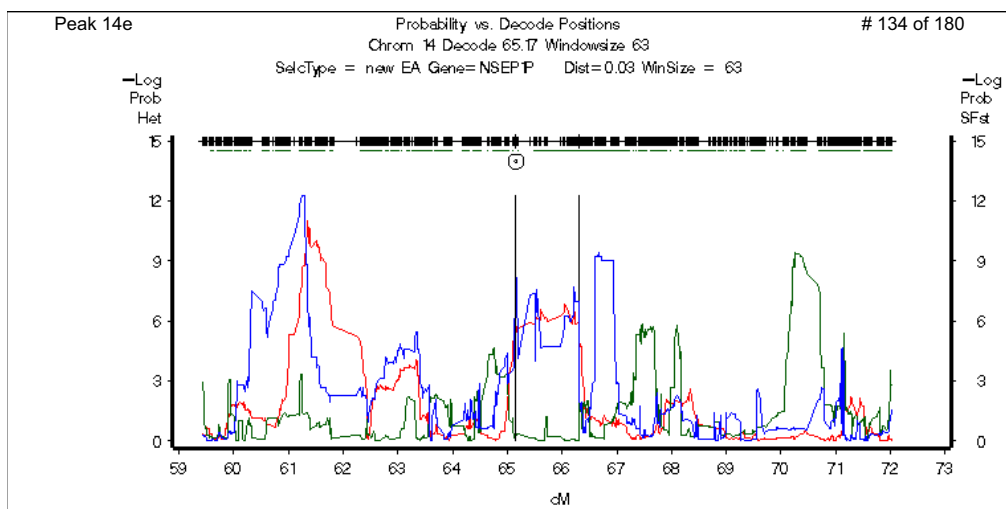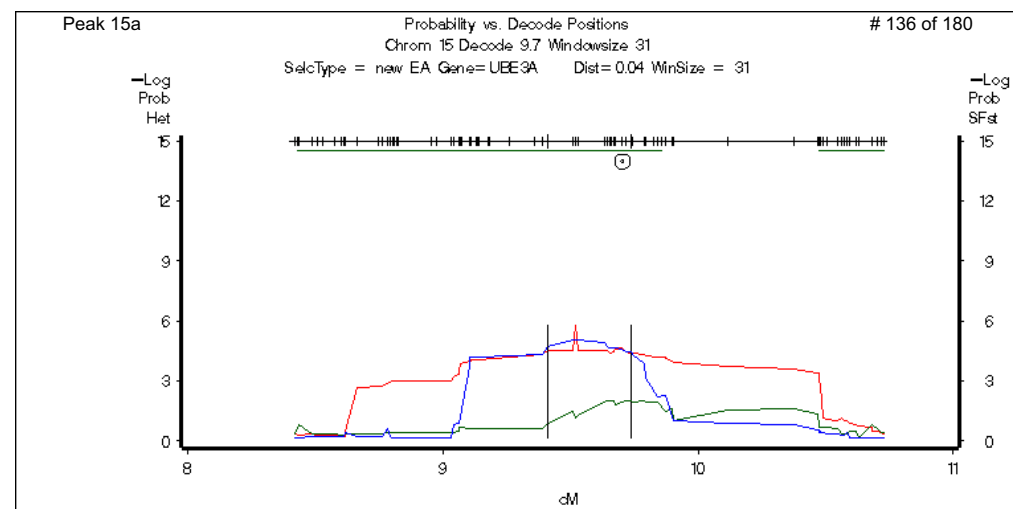

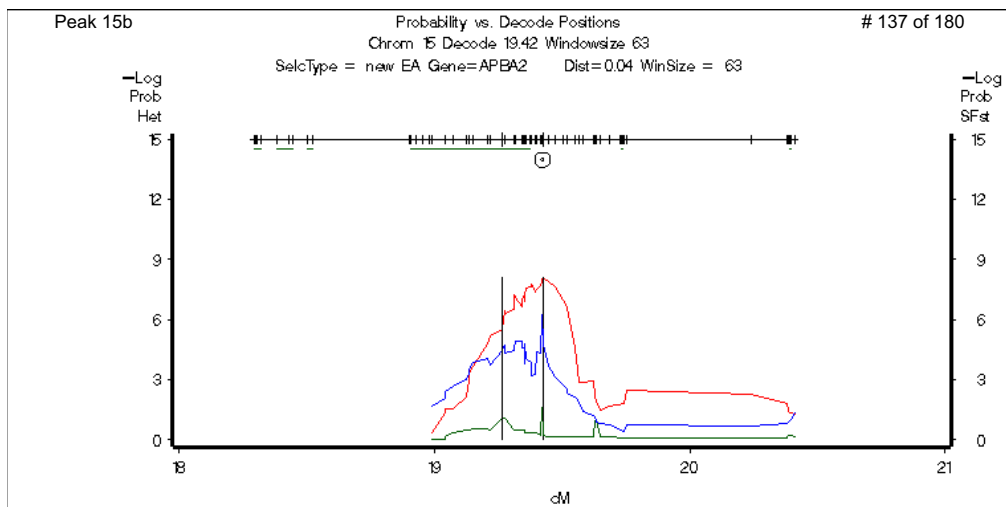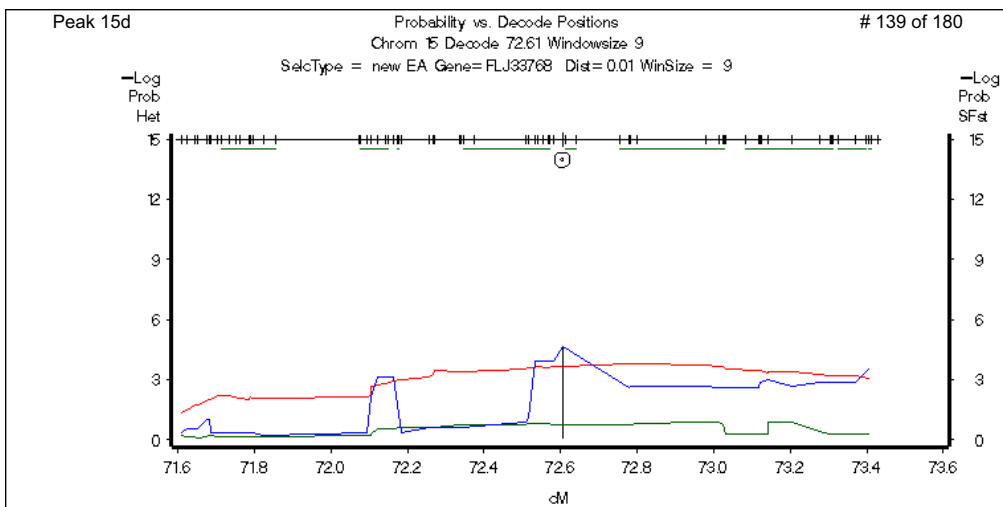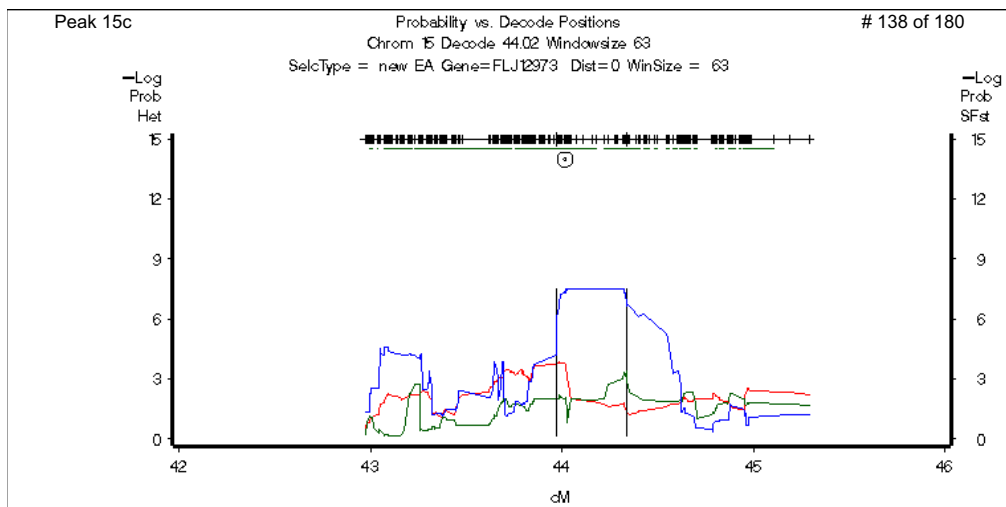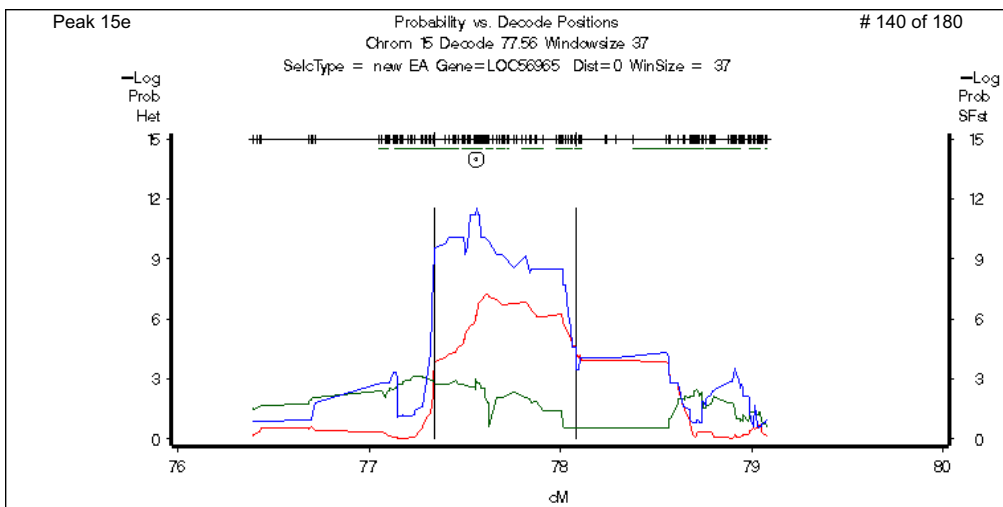

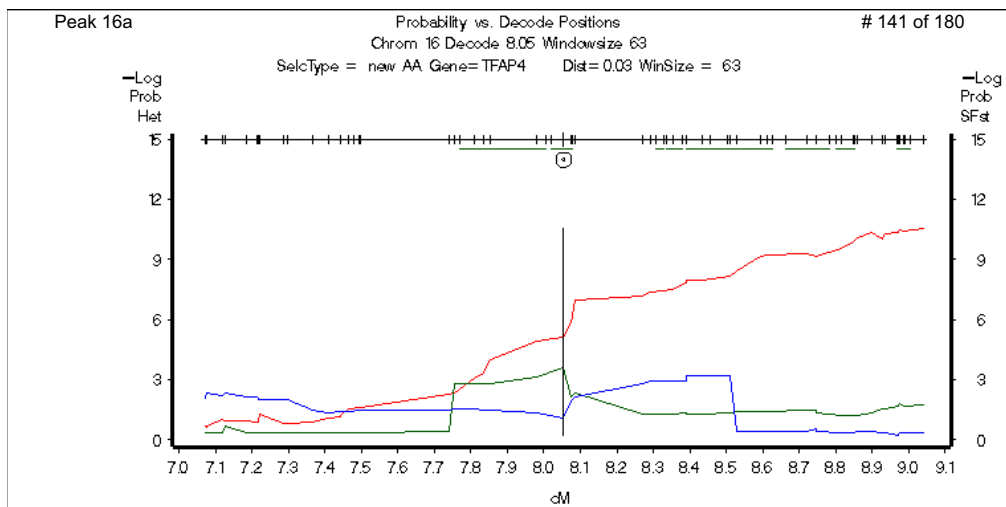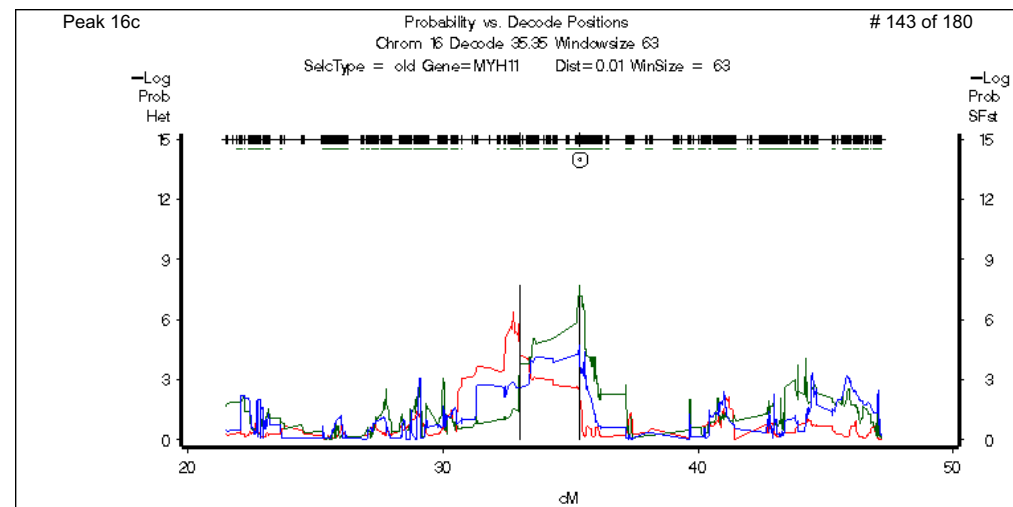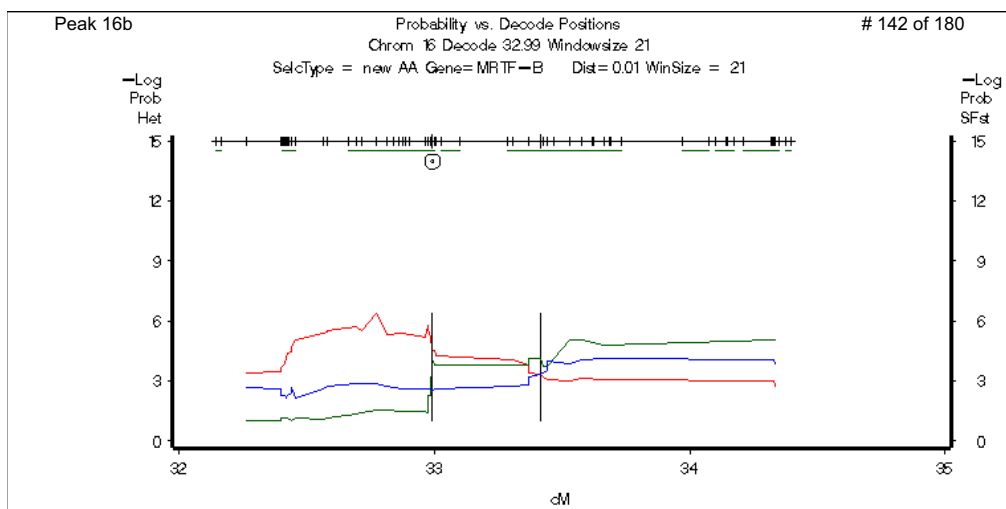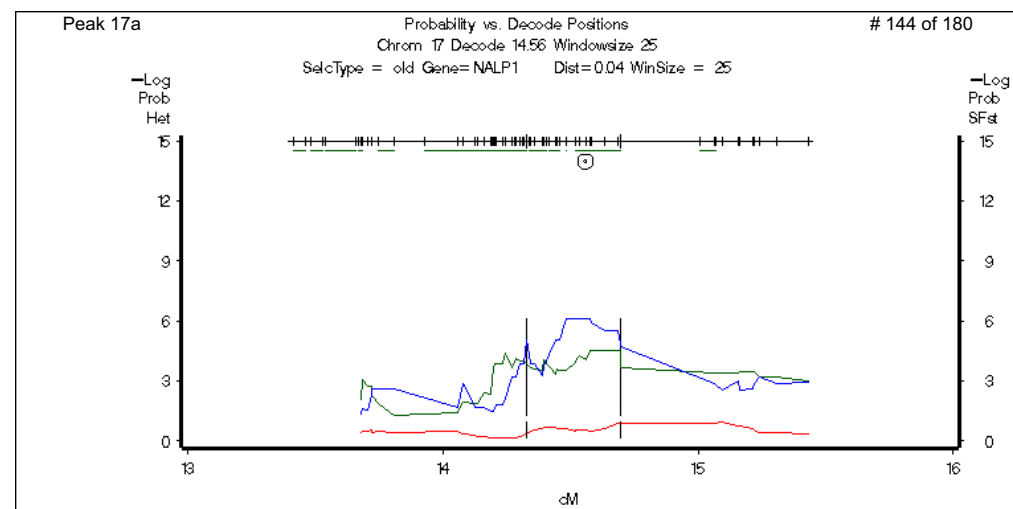

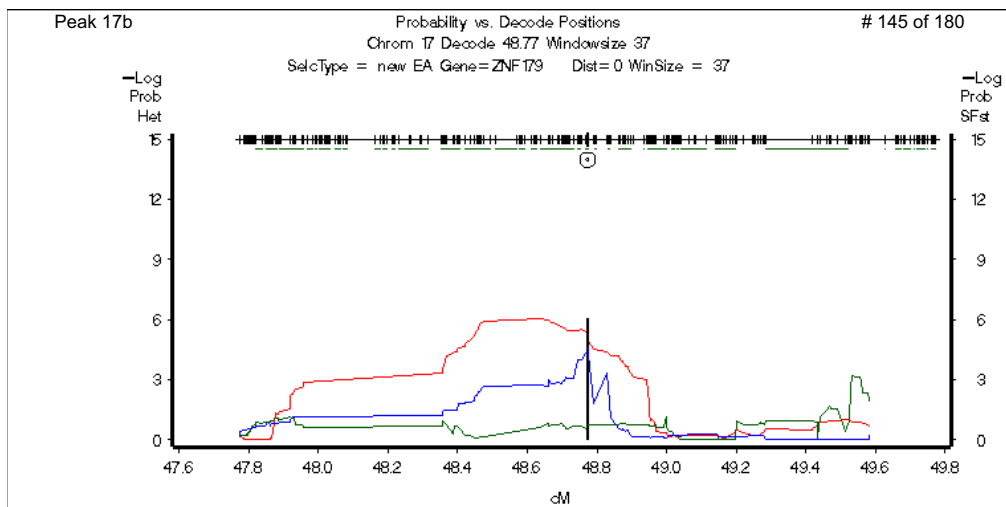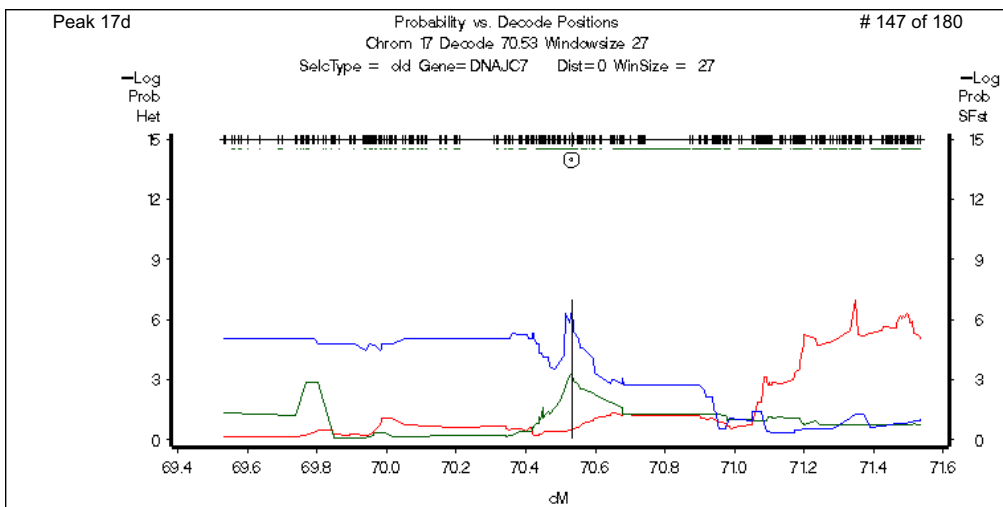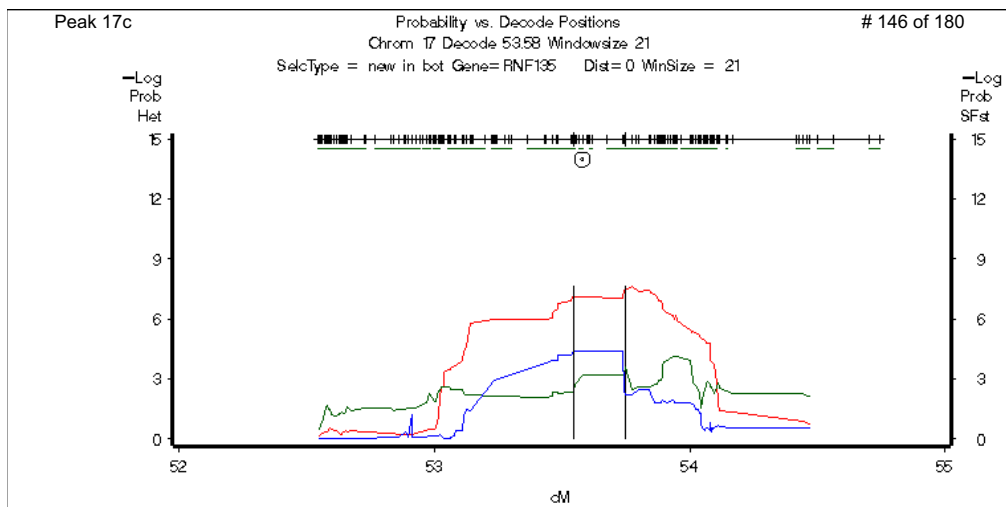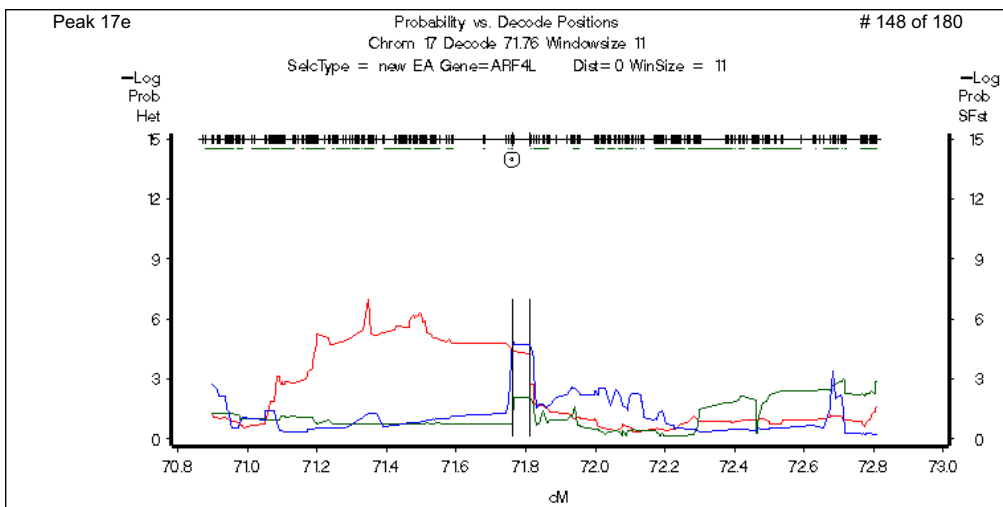

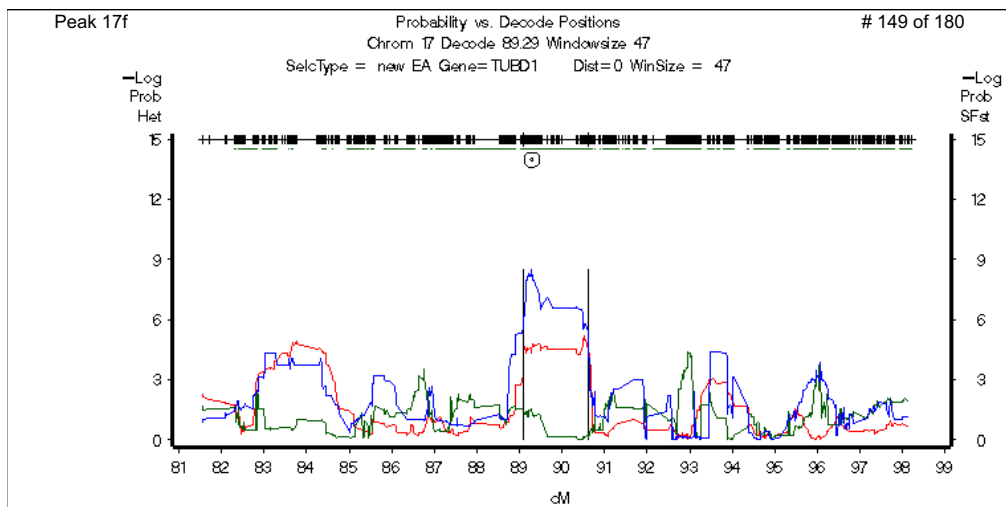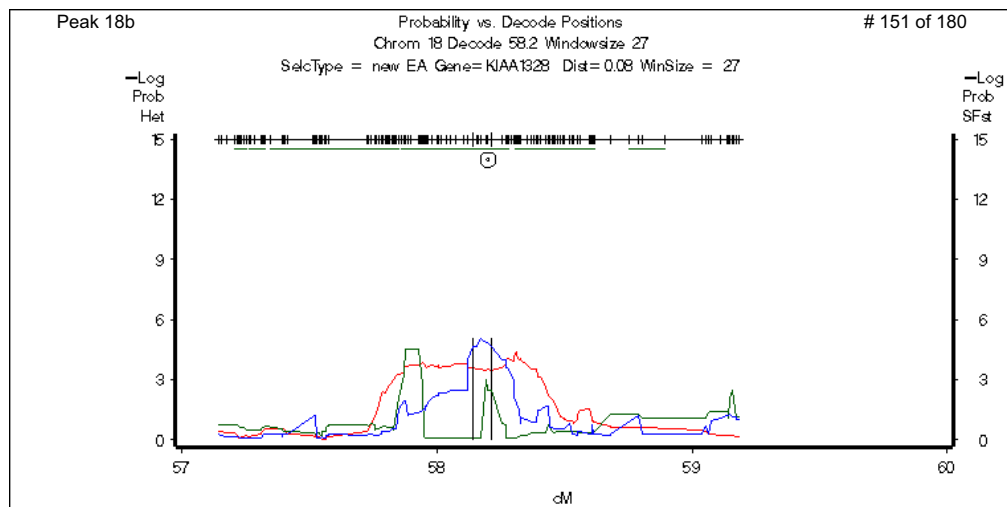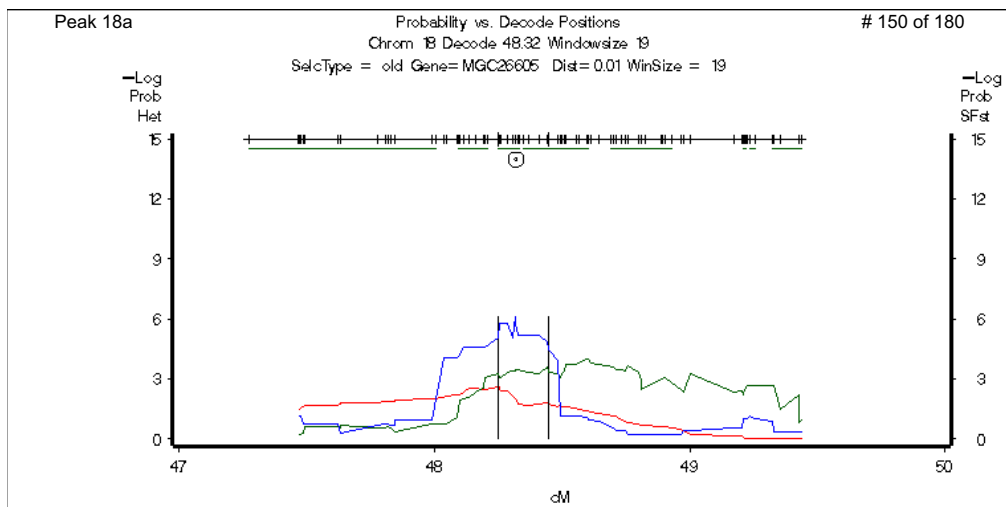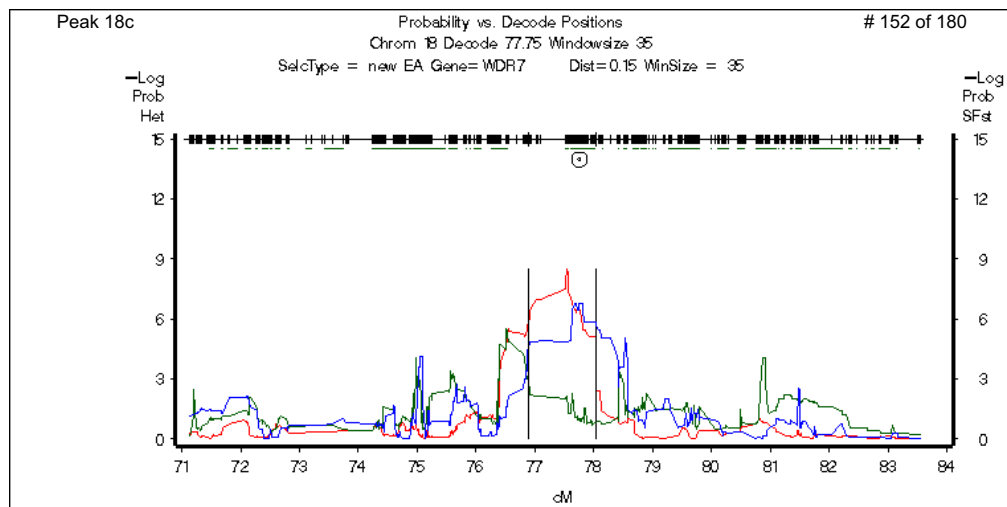

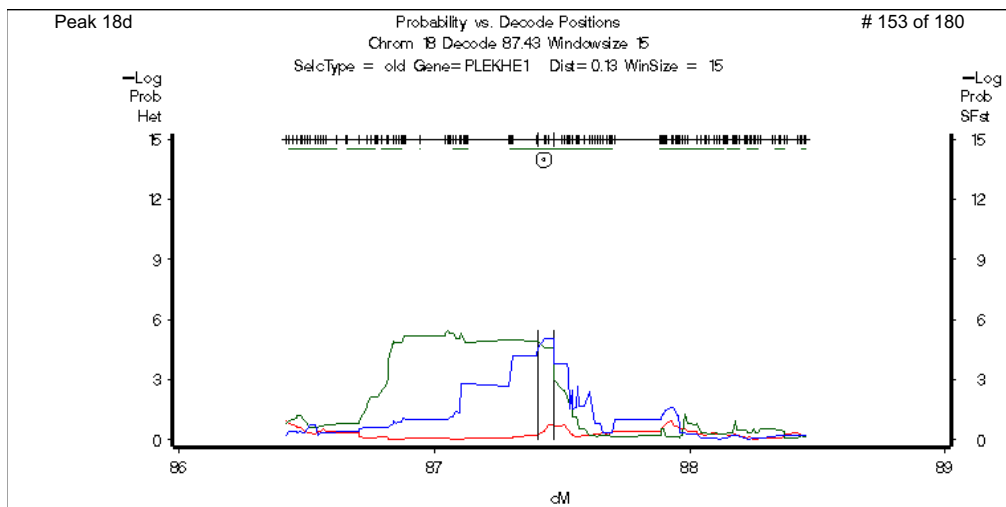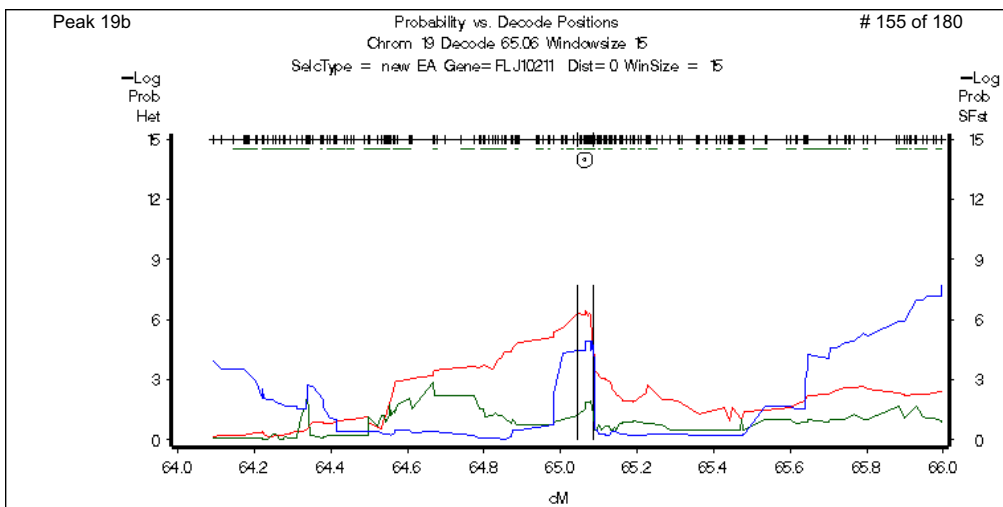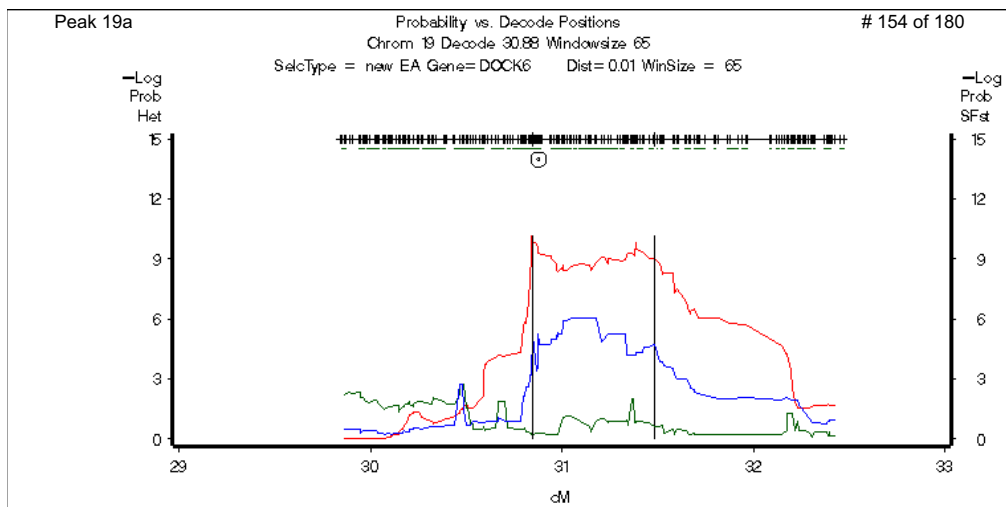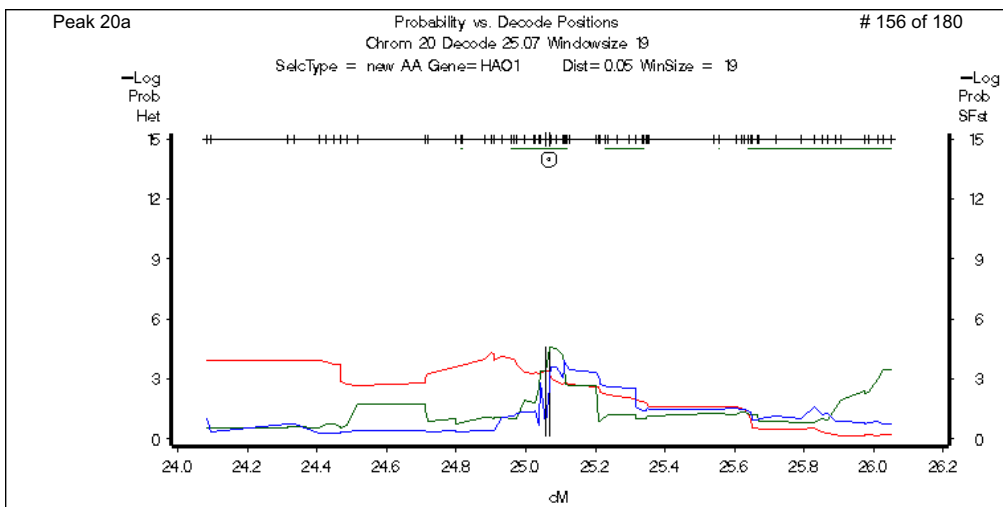

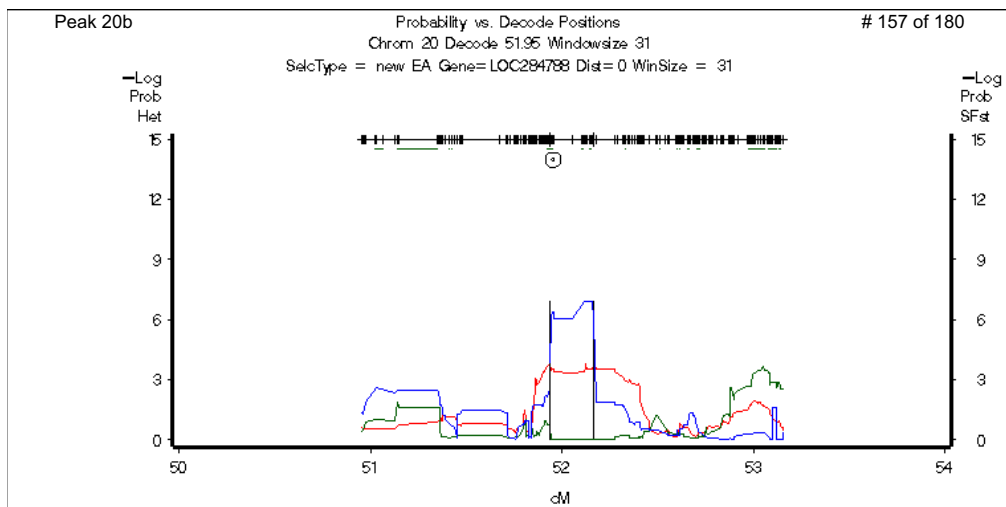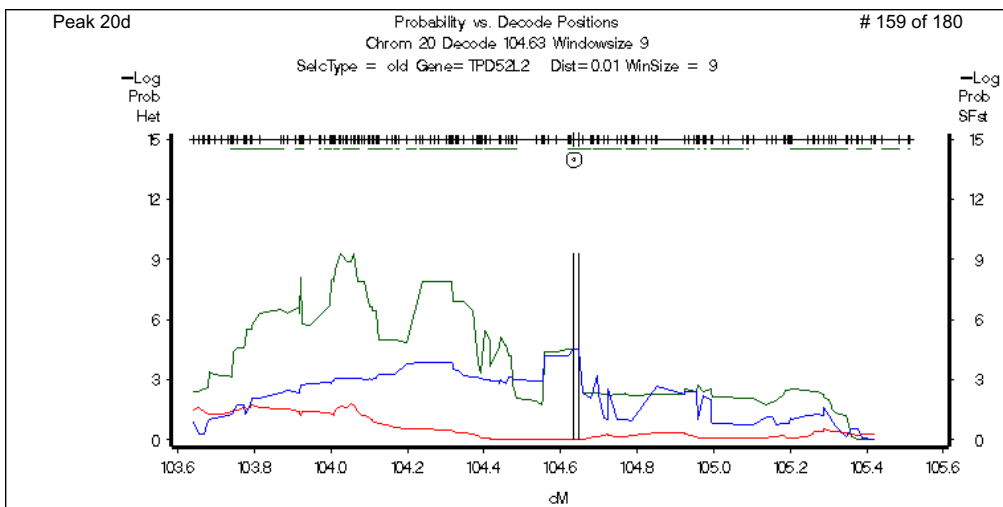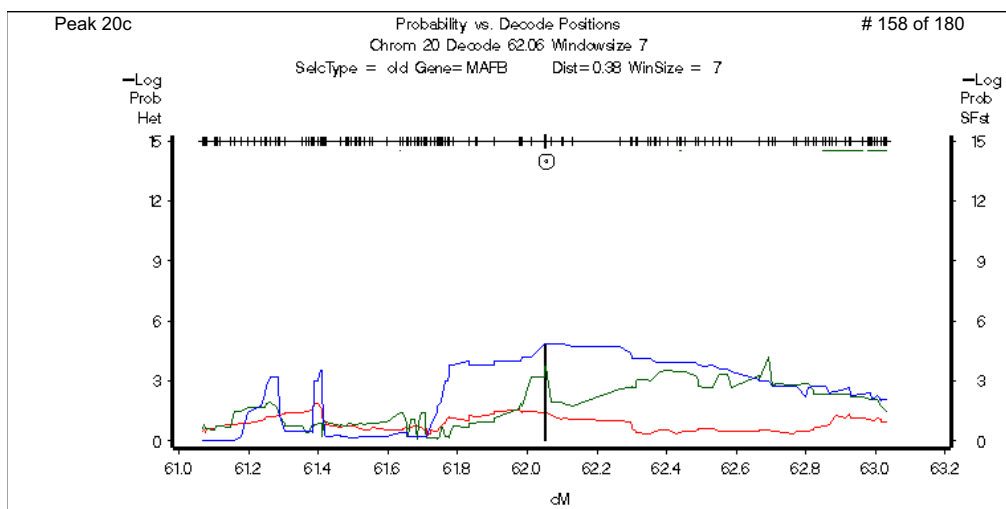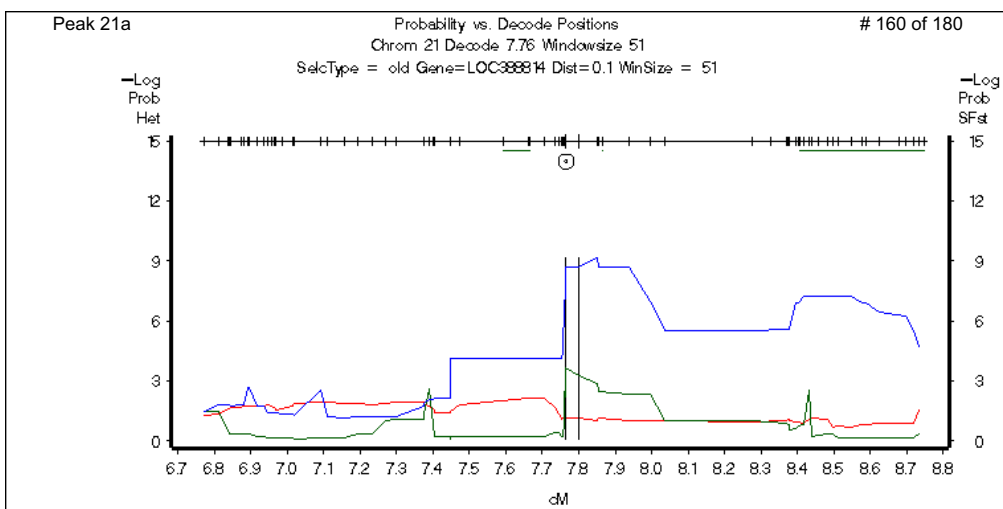



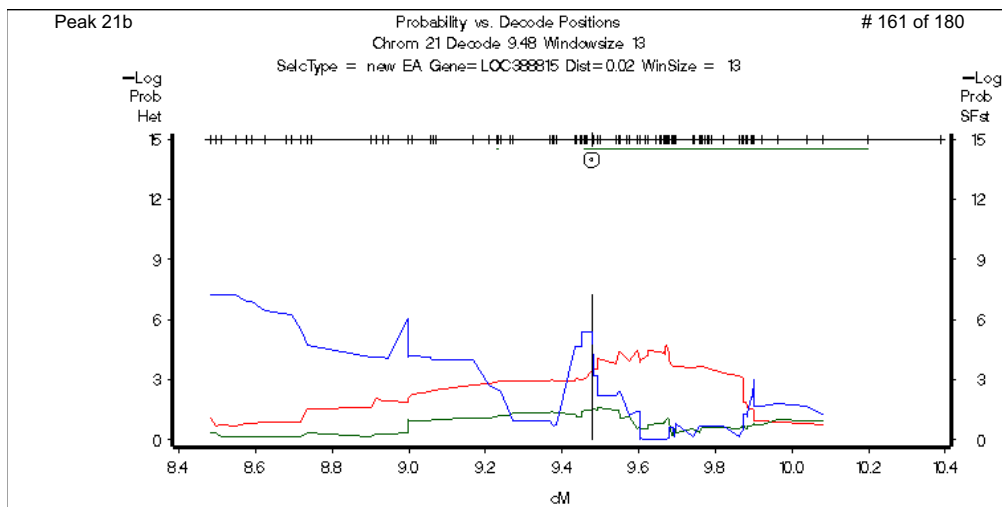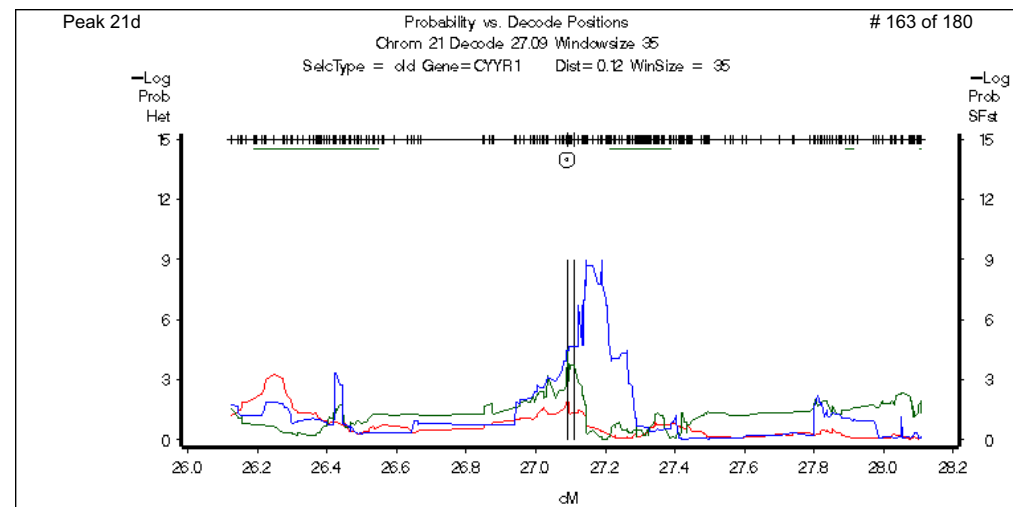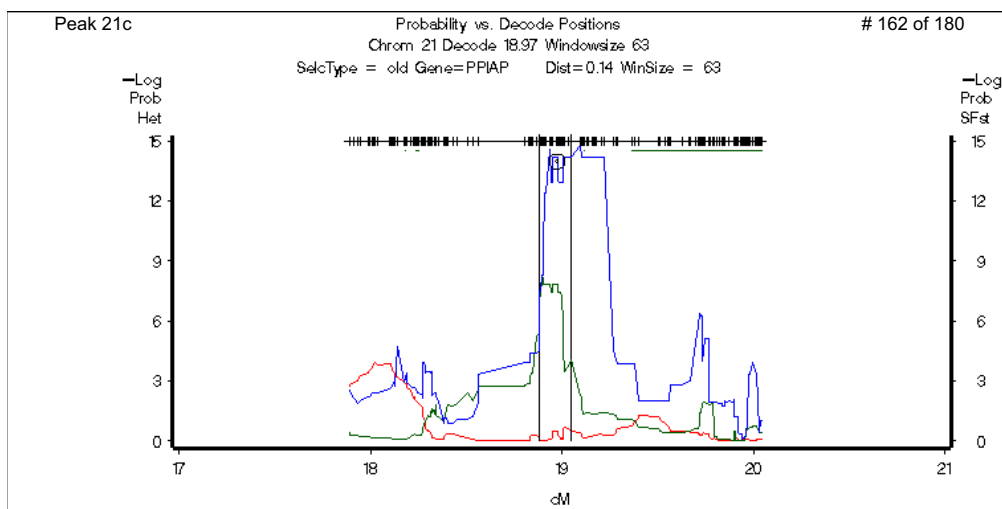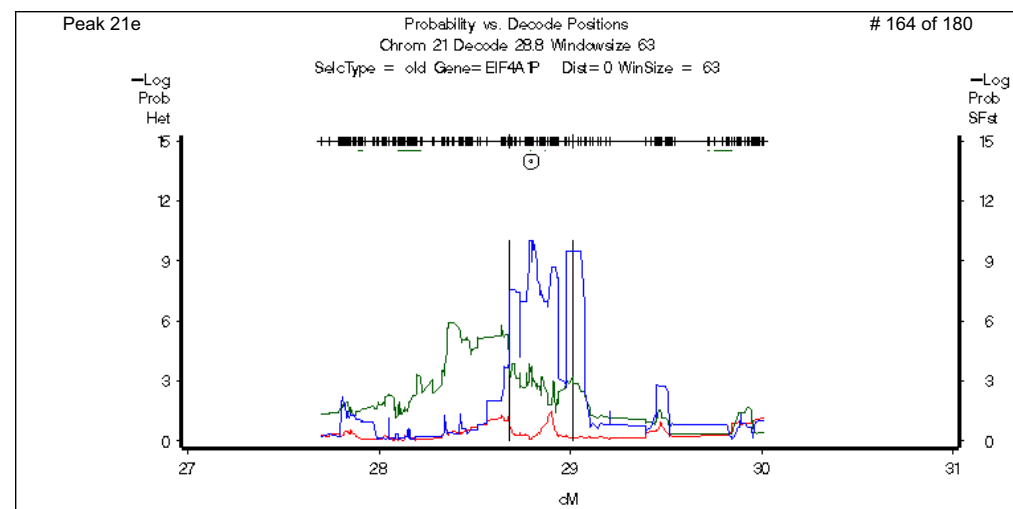

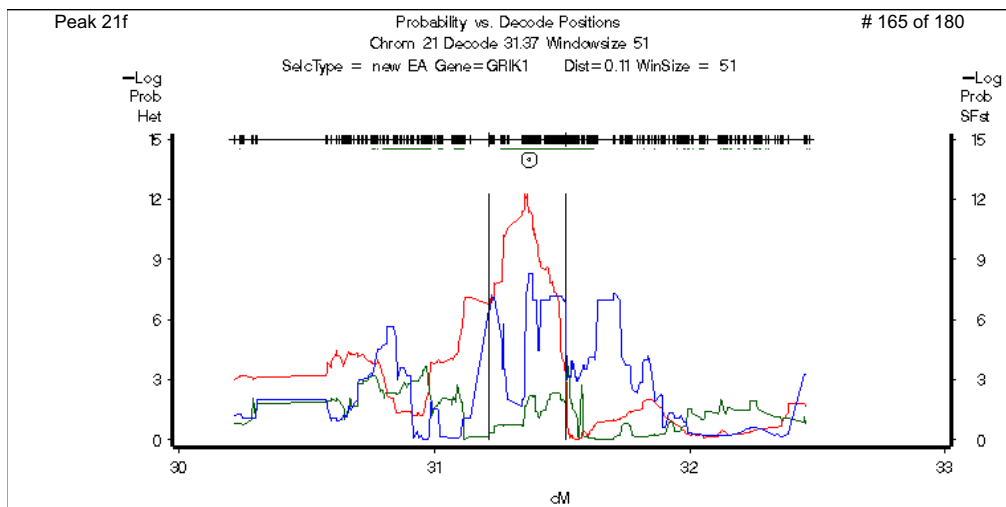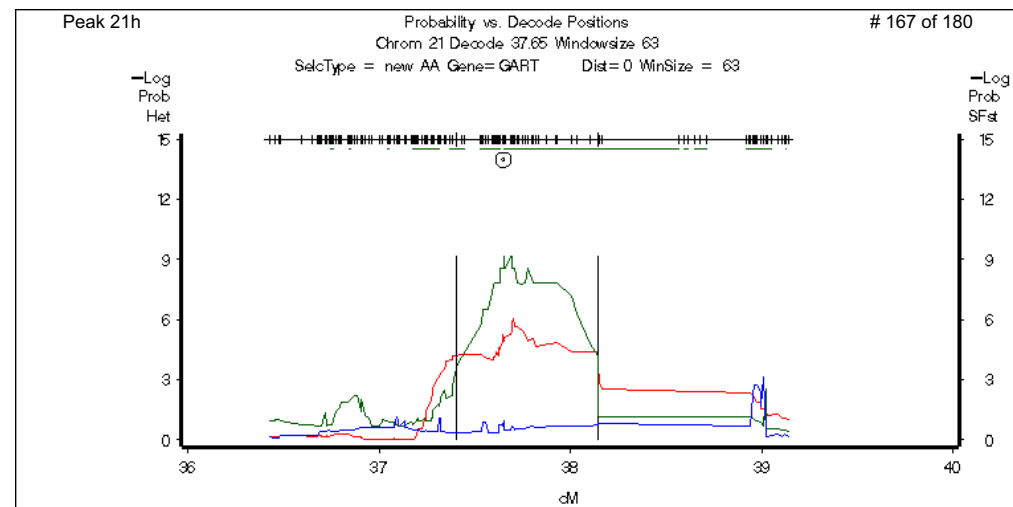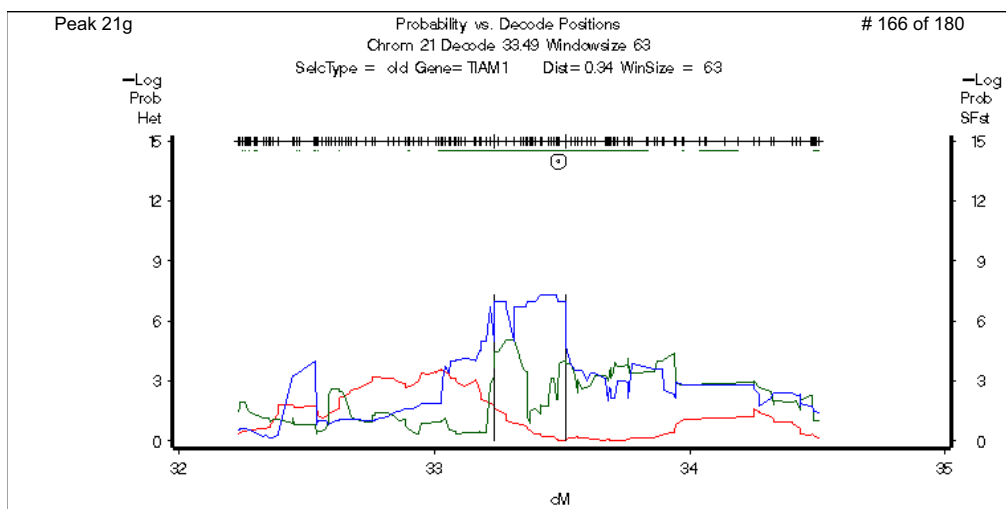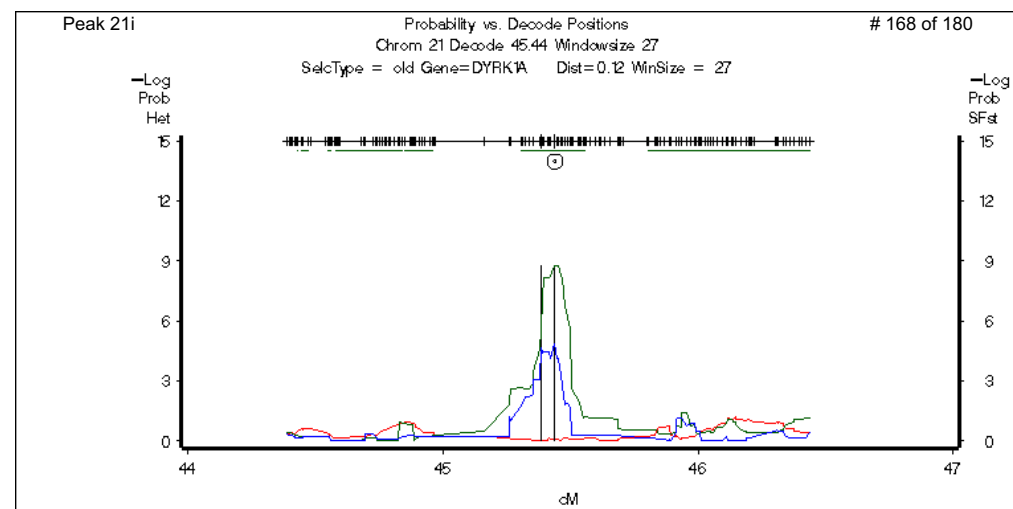

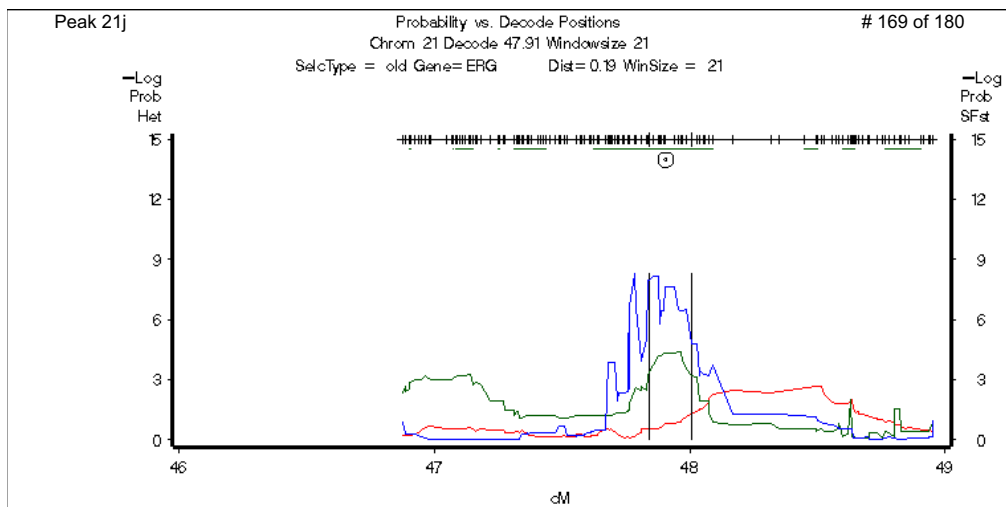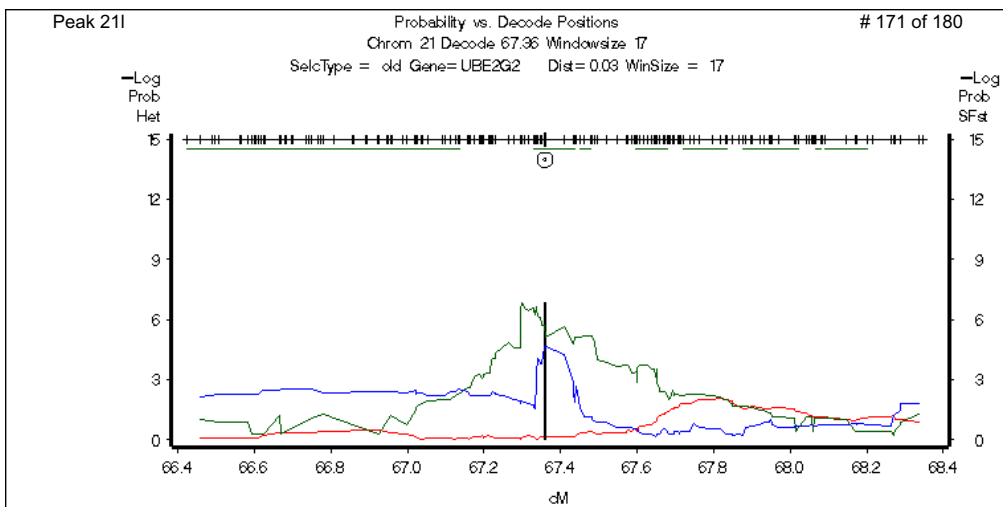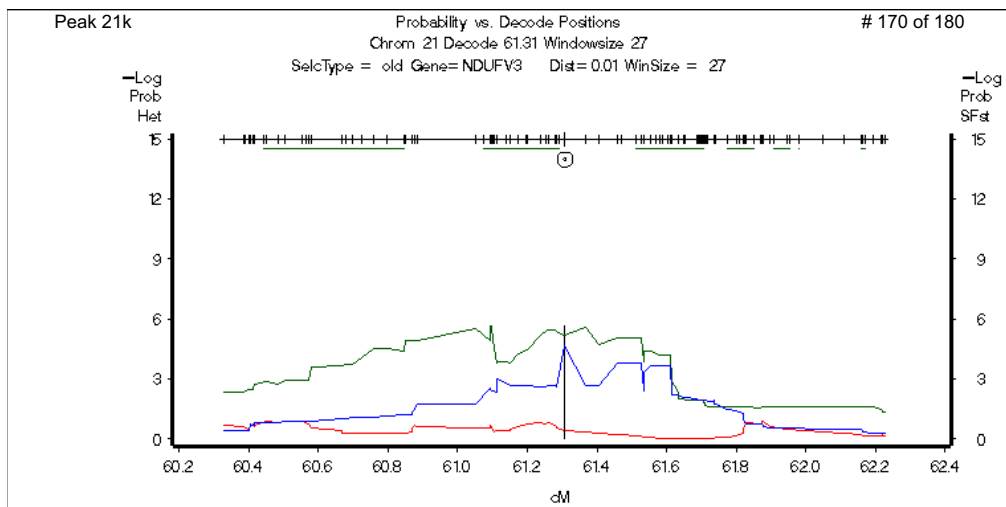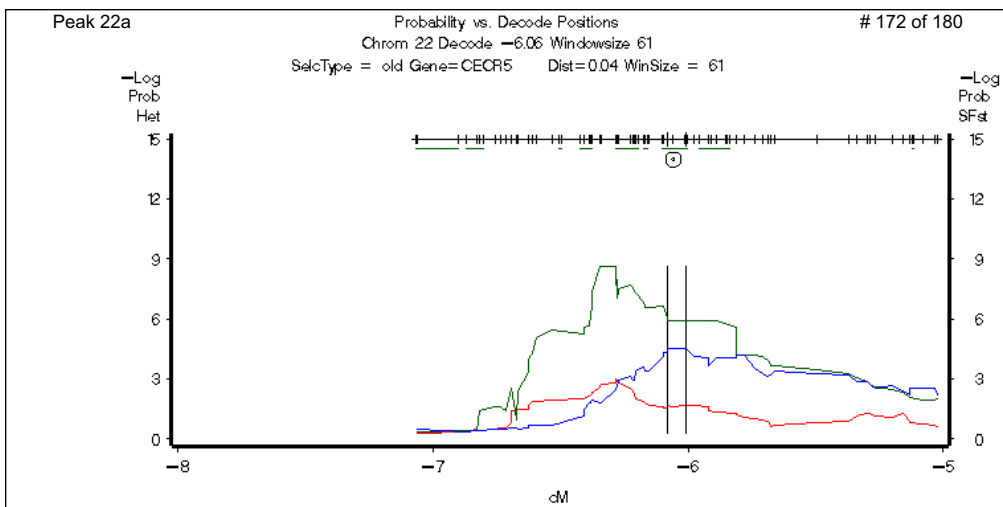

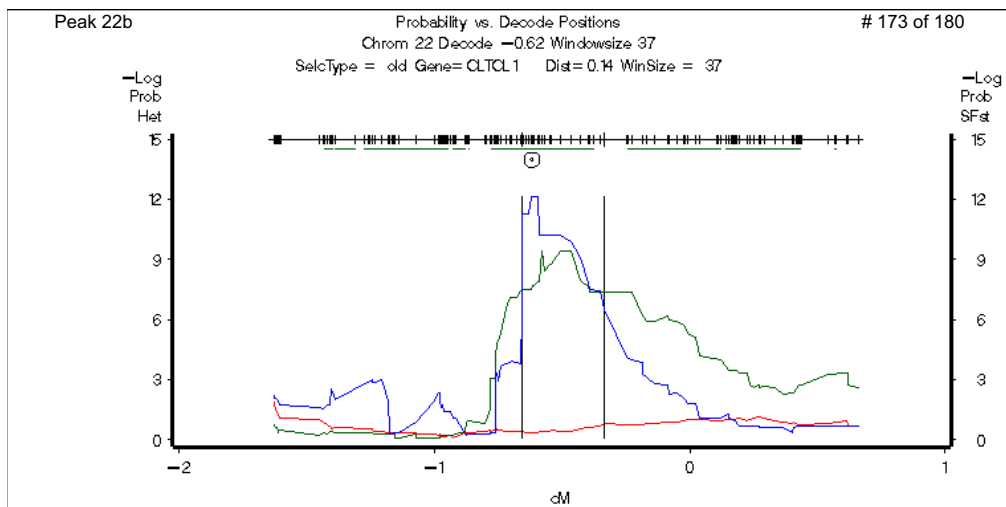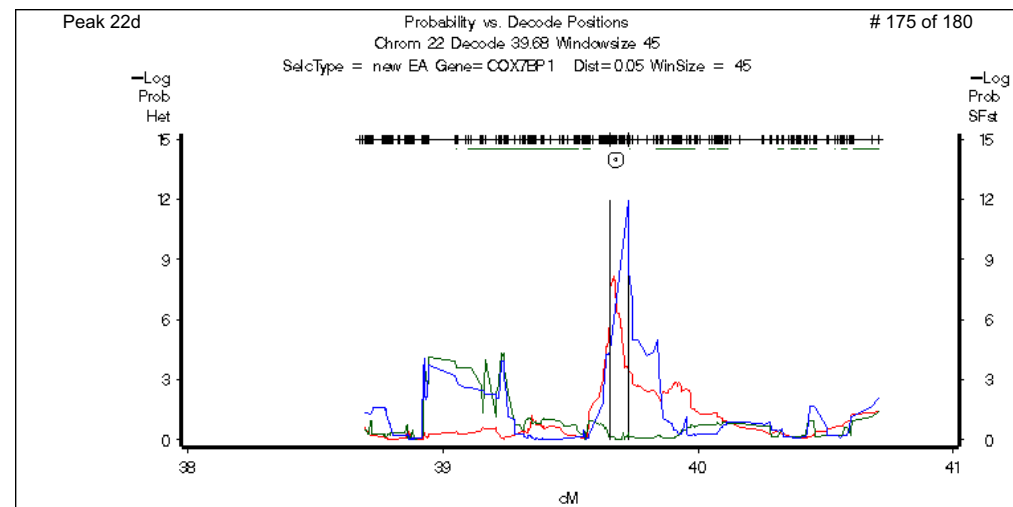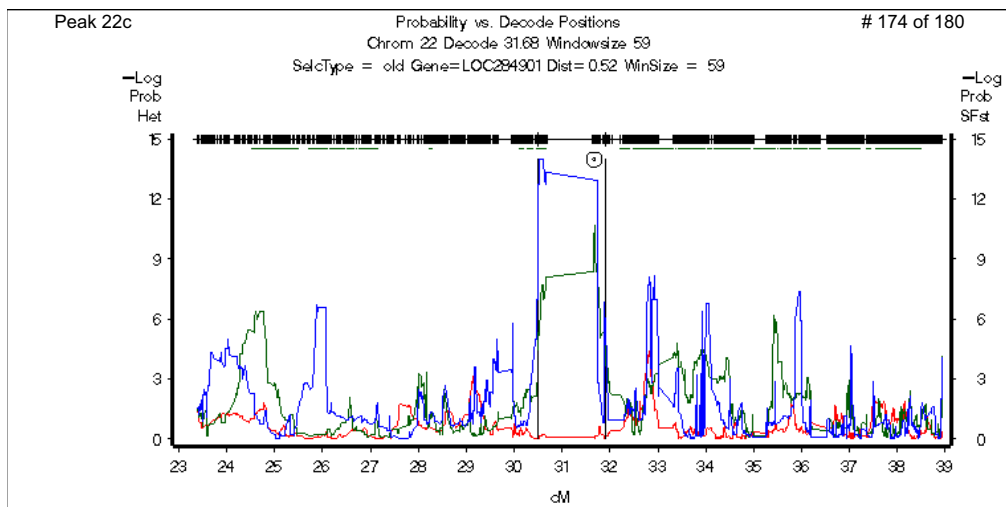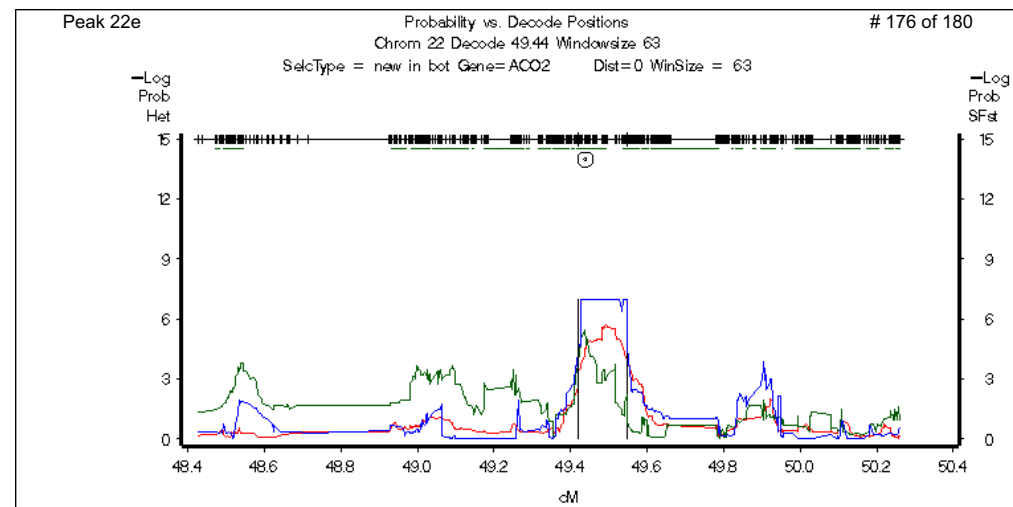

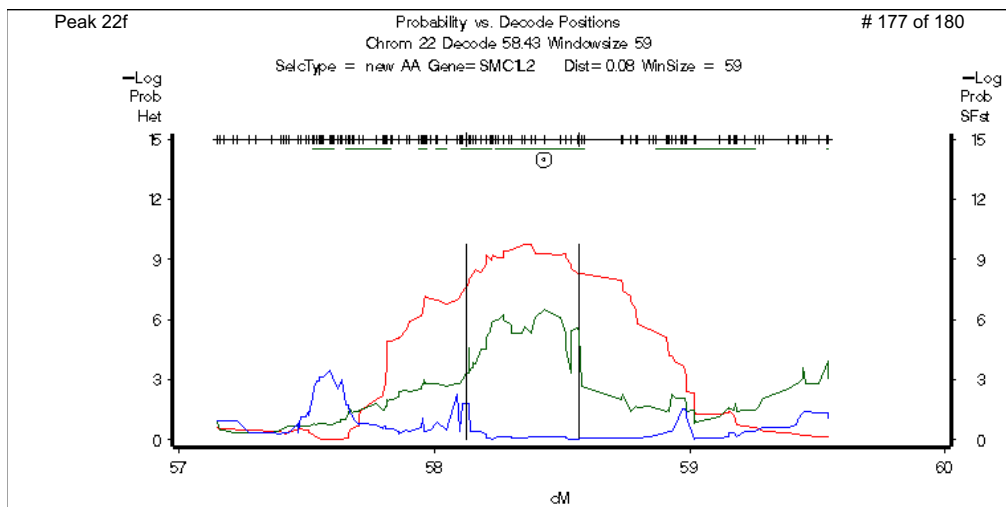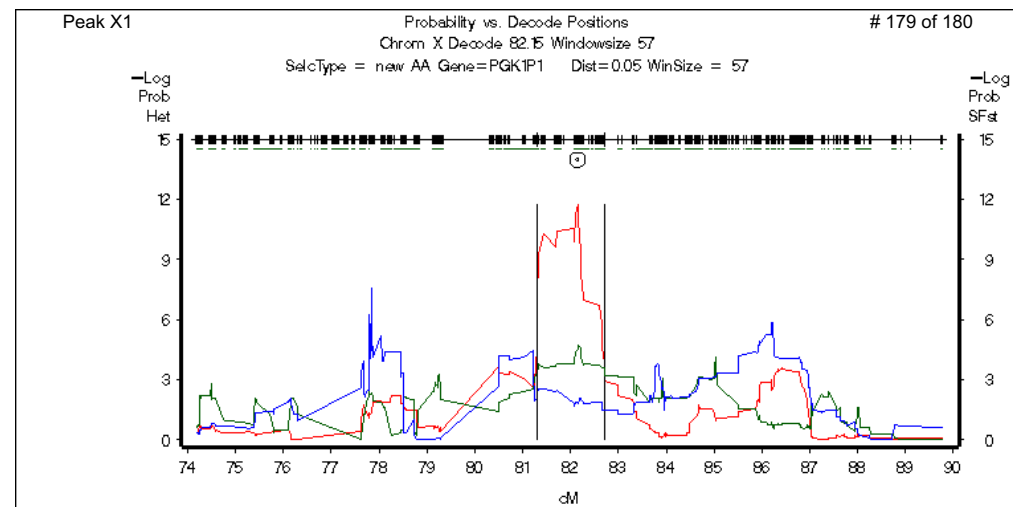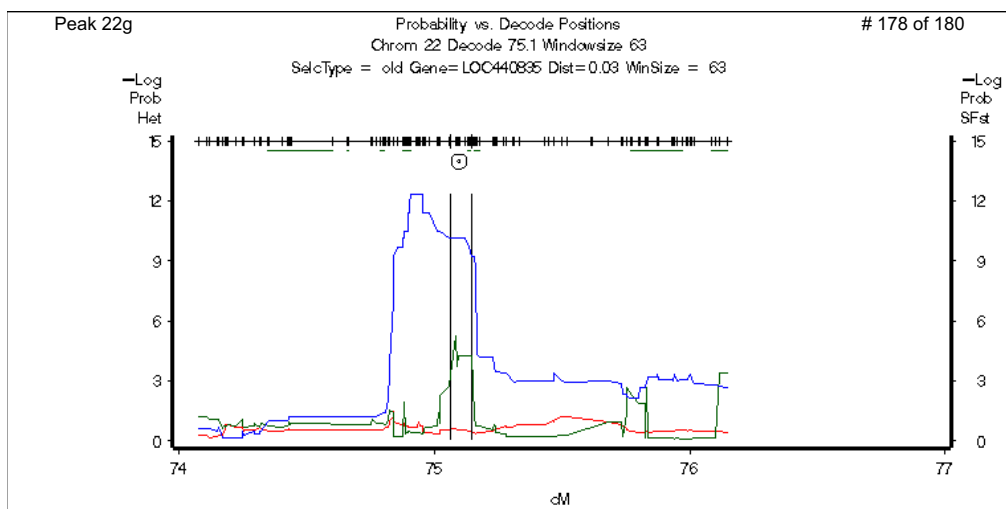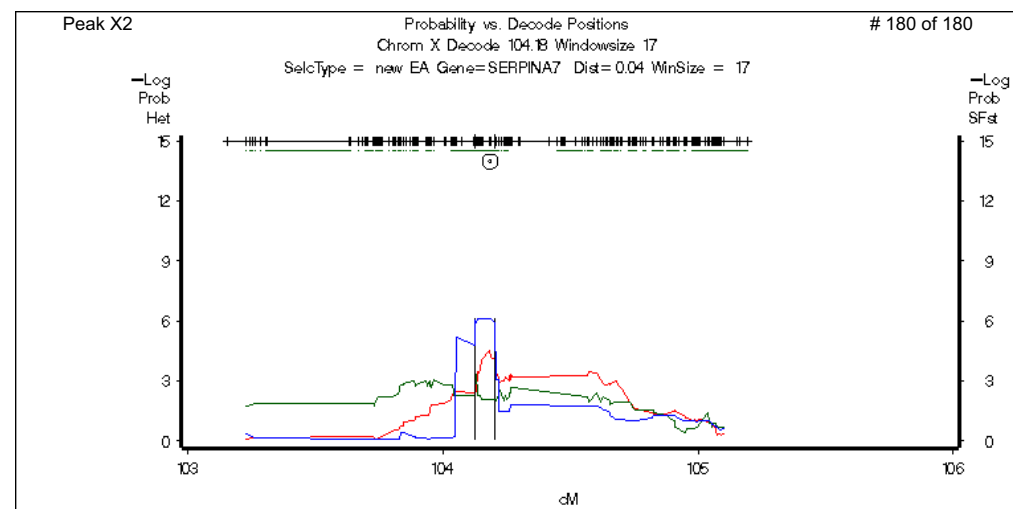

Supplement: pone.0001712.s007.pdf [file pone.0001712.s007.pdf]
